# Supplementary material
Source: PubMed Central journal article supplement (PMC9903937)
Supplement: mmc1.pdf [file mmc1.pdf]

## **Content**

1. Supplementary Table 1. Caesarean section rates by region, province and year.
2. Supplementary Figure 1. Flow chart of the participants included in the analysis
3. Supplementary Figure 2. Caesarean section rates by region and year.
4. Supplementary Figure 3. Geographic and temporal profiles of caesarean section rates in Peru between 2012 and 2020.
5. Strengthening the Reporting of Observational studies in Epidemiology (STROBE) checklist.

**Supplementary Table 1.** C-section rate region, natural region, province and year.

| Year | Natural region | Natural region C-section rate (%; 95% CI) | Region      | Region C-section rate (%; 95% CI) | Province      | Number of births | Province C-section rate (%; 95% CI) |
|------|----------------|-------------------------------------------|-------------|-----------------------------------|---------------|------------------|-------------------------------------|
| 2012 | Amazon         | 22 (20 - 25)                              | AMAZONAS    | 22 (19 - 26)                      | BAGUA         | 181              | 43 (35 - 50)                        |
| 2012 | Amazon         | 22 (20 - 25)                              | AMAZONAS    | 22 (19 - 26)                      | CHACHAPOYAS   | 227              | 15 (11 - 20)                        |
| 2012 | Amazon         | 22 (20 - 25)                              | AMAZONAS    | 22 (19 - 26)                      | LUYA          | 45               | 0                                   |
| 2012 | Amazon         | 22 (20 - 25)                              | SAN MARTIN  | 57 (47 - 67)                      | SAN MARTIN    | 101              | 57 (47 - 67)                        |
| 2012 | Coast          | 41 (40 - 41)                              | CALLAO      | 30 (29 - 31)                      | CALLAO        | 6941             | 30 (29 - 31)                        |
| 2012 | Coast          | 41 (40 - 41)                              | ICA         | 32 (27 - 37)                      | CHINCHA       | 129              | 43 (34 - 52)                        |
| 2012 | Coast          | 41 (40 - 41)                              | ICA         | 32 (27 - 37)                      | ICA           | 211              | 26 (20 - 32)                        |
| 2012 | Coast          | 41 (40 - 41)                              | LA LIBERTAD | 48 (43 - 52)                      | TRUJILLO      | 523              | 48 (43 - 52)                        |
| 2012 | Coast          | 41 (40 - 41)                              | LIMA        | 42 (42 - 42)                      | HUAURA        | 1681             | 37 (34 - 39)                        |
| 2012 | Coast          | 41 (40 - 41)                              | LIMA        | 42 (42 - 42)                      | LIMA          | 48915            | 42 (42 - 43)                        |
| 2012 | Coast          | 41 (40 - 41)                              | PIURA       | 47 (45 - 49)                      | AYABACA       | 132              | 5 (2 - 10)                          |
| 2012 | Coast          | 41 (40 - 41)                              | PIURA       | 47 (45 - 49)                      | PIURA         | 2607             | 50 (48 - 52)                        |
| 2012 | Coast          | 41 (40 - 41)                              | PIURA       | 47 (45 - 49)                      | SULLANA       | 181              | 39 (32 - 46)                        |
| 2012 | Coast          | 41 (40 - 41)                              | TACNA       | 44 (39 - 48)                      | TACNA         | 448              | 44 (39 - 48)                        |
| 2012 | Highlands      | 35 (34 - 36)                              | APURIMAC    | 28 (26 - 32)                      | ABANCAY       | 740              | 28 (25 - 31)                        |
| 2012 | Highlands      | 35 (34 - 36)                              | APURIMAC    | 28 (26 - 32)                      | ANDAHUAYLAS   | 149              | 32 (24 - 40)                        |
| 2012 | Highlands      | 35 (34 - 36)                              | AREQUIPA    | 48 (45 - 51)                      | AREQUIPA      | 941              | 48 (45 - 51)                        |
| 2012 | Highlands      | 35 (34 - 36)                              | CAJAMARCA   | 39 (36 - 42)                      | CAJAMARCA     | 1151             | 39 (36 - 42)                        |
| 2012 | Highlands      | 35 (34 - 36)                              | CUSCO       | 33 (31 - 34)                      | CANCHIS       | 622              | 32 (28 - 35)                        |
| 2012 | Highlands      | 35 (34 - 36)                              | CUSCO       | 33 (31 - 34)                      | CUSCO         | 3824             | 33 (31 - 34)                        |
| 2012 | Highlands      | 35 (34 - 36)                              | HUANUCO     | 33 (31 - 35)                      | HUANUCO       | 909              | 38 (34 - 41)                        |
| 2012 | Highlands      | 35 (34 - 36)                              | HUANUCO     | 33 (31 - 35)                      | LEONCIO PRADO | 611              | 26 (23 - 30)                        |
| 2012 | Highlands      | 35 (34 - 36)                              | PUNO        | 33 (27 - 39)                      | PUNO          | 67               | 33 (22 - 45)                        |
| 2012 | Highlands      | 35 (34 - 36)                              | PUNO        | 33 (27 - 39)                      | SAN ROMAN     | 161              | 33 (26 - 41)                        |
| 2013 | Amazon         | 33 (32 - 34)                              | AMAZONAS    | 32 (30 - 34)                      | BAGUA         | 774              | 47 (43 - 50)                        |
| 2013 | Amazon         | 33 (32 - 34)                              | AMAZONAS    | 32 (30 - 34)                      | BONGARA       | 77               | 0                                   |
| 2013 | Amazon         | 33 (32 - 34)                              | AMAZONAS    | 32 (30 - 34)                      | CHACHAPOYAS   | 1203             | 30 (27 - 32)                        |

|      |        |              |               |              |                      |       |              |
|------|--------|--------------|---------------|--------------|----------------------|-------|--------------|
| 2013 | Amazon | 33 (32 - 34) | AMAZONAS      | 32 (30 - 34) | CONDORCANQUI         | 33    | 48 (31 - 66) |
| 2013 | Amazon | 33 (32 - 34) | AMAZONAS      | 32 (30 - 34) | LUYA                 | 106   | 0            |
| 2013 | Amazon | 33 (32 - 34) | AMAZONAS      | 32 (30 - 34) | RODRIGUEZ DE MENDOZA | 124   | 0            |
| 2013 | Amazon | 33 (32 - 34) | AMAZONAS      | 32 (30 - 34) | UTCUBAMBA            | 581   | 33 (29 - 37) |
| 2013 | Amazon | 33 (32 - 34) | MADRE DE DIOS | 22 (20 - 25) | TAMBOPATA            | 1080  | 22 (20 - 25) |
| 2013 | Amazon | 33 (32 - 34) | SAN MARTIN    | 46 (44 - 48) | SAN MARTIN           | 2535  | 46 (44 - 48) |
| 2013 | Amazon | 33 (32 - 34) | UCAYALI       | 19 (17 - 21) | CORONEL PORTILLO     | 756   | 29 (26 - 33) |
| 2013 | Amazon | 33 (32 - 34) | UCAYALI       | 19 (17 - 21) | PADRE ABAD           | 538   | 4 (2 - 6)    |
| 2013 | Coast  | 39 (39 - 39) | CALLAO        | 34 (33 - 34) | CALLAO               | 10239 | 34 (33 - 34) |
| 2013 | Coast  | 39 (39 - 39) | ICA           | 33 (32 - 35) | CHINCHA              | 2348  | 41 (39 - 43) |
| 2013 | Coast  | 39 (39 - 39) | ICA           | 33 (32 - 35) | ICA                  | 2738  | 27 (25 - 29) |
| 2013 | Coast  | 39 (39 - 39) | LA LIBERTAD   | 40 (39 - 41) | ASCOPE               | 165   | 0            |
| 2013 | Coast  | 39 (39 - 39) | LA LIBERTAD   | 40 (39 - 41) | CHEPEN               | 410   | 52 (47 - 57) |
| 2013 | Coast  | 39 (39 - 39) | LA LIBERTAD   | 40 (39 - 41) | GRAN CHIMU           | 46    | 0            |
| 2013 | Coast  | 39 (39 - 39) | LA LIBERTAD   | 40 (39 - 41) | OTUZCO               | 162   | 48 (40 - 56) |
| 2013 | Coast  | 39 (39 - 39) | LA LIBERTAD   | 40 (39 - 41) | PACASMAYO            | 1065  | 41 (38 - 44) |
| 2013 | Coast  | 39 (39 - 39) | LA LIBERTAD   | 40 (39 - 41) | SANCHEZ CARRION      | 102   | 30 (22 - 40) |
| 2013 | Coast  | 39 (39 - 39) | LA LIBERTAD   | 40 (39 - 41) | TRUJILLO             | 8572  | 41 (40 - 42) |
| 2013 | Coast  | 39 (39 - 39) | LA LIBERTAD   | 40 (39 - 41) | VIRU                 | 258   | 0            |
| 2013 | Coast  | 39 (39 - 39) | LAMBAYEQUE    | 32 (30 - 33) | CHICLAYO             | 1657  | 43 (41 - 45) |
| 2013 | Coast  | 39 (39 - 39) | LAMBAYEQUE    | 32 (30 - 33) | FERREÑAFE            | 629   | 6 (4 - 8)    |
| 2013 | Coast  | 39 (39 - 39) | LAMBAYEQUE    | 32 (30 - 33) | LAMBAYEQUE           | 1536  | 30 (28 - 32) |
| 2013 | Coast  | 39 (39 - 39) | LIMA          | 39 (39 - 39) | CAÑETE               | 1644  | 35 (33 - 37) |
| 2013 | Coast  | 39 (39 - 39) | LIMA          | 39 (39 - 39) | HUARAL               | 801   | 26 (23 - 30) |
| 2013 | Coast  | 39 (39 - 39) | LIMA          | 39 (39 - 39) | HUAURA               | 2962  | 36 (34 - 38) |
| 2013 | Coast  | 39 (39 - 39) | LIMA          | 39 (39 - 39) | LIMA                 | 93763 | 39 (39 - 40) |
| 2013 | Coast  | 39 (39 - 39) | MOQUEGUA      | 40 (37 - 42) | ILO                  | 667   | 42 (38 - 45) |
| 2013 | Coast  | 39 (39 - 39) | MOQUEGUA      | 40 (37 - 42) | MARISCAL NIETO       | 696   | 38 (34 - 42) |
| 2013 | Coast  | 39 (39 - 39) | PIURA         | 45 (44 - 46) | AYABACA              | 117   | 0            |
| 2013 | Coast  | 39 (39 - 39) | PIURA         | 45 (44 - 46) | MORROPON             | 911   | 30 (27 - 33) |
| 2013 | Coast  | 39 (39 - 39) | PIURA         | 45 (44 - 46) | PIURA                | 3876  | 51 (49 - 53) |

|      |           |              |           |              |                       |       |              |
|------|-----------|--------------|-----------|--------------|-----------------------|-------|--------------|
| 2013 | Coast     | 39 (39 - 39) | PIURA     | 45 (44 - 46) | SECHURA               | 207   | 0            |
| 2013 | Coast     | 39 (39 - 39) | PIURA     | 45 (44 - 46) | SULLANA               | 4097  | 47 (46 - 49) |
| 2013 | Coast     | 39 (39 - 39) | PIURA     | 45 (44 - 46) | TALARA                | 114   | 0            |
| 2013 | Coast     | 39 (39 - 39) | TACNA     | 46 (44 - 47) | TACNA                 | 3490  | 46 (44 - 47) |
| 2013 | Coast     | 39 (39 - 39) | TUMBES    | 49 (47 - 50) | CONTRALMIRANTE VILLAR | 94    | 2 (0 - 7)    |
| 2013 | Coast     | 39 (39 - 39) | TUMBES    | 49 (47 - 50) | TUMBES                | 2993  | 55 (53 - 57) |
| 2013 | Coast     | 39 (39 - 39) | TUMBES    | 49 (47 - 50) | ZARUMILLA             | 275   | 0            |
| 2013 | Highlands | 32 (32 - 33) | ANCASH    | 49 (44 - 53) | HUAYLAS               | 136   | 26 (19 - 35) |
| 2013 | Highlands | 32 (32 - 33) | ANCASH    | 49 (44 - 53) | SANTA                 | 412   | 56 (51 - 61) |
| 2013 | Highlands | 32 (32 - 33) | APURIMAC  | 37 (35 - 39) | ABANCAY               | 1915  | 35 (33 - 38) |
| 2013 | Highlands | 32 (32 - 33) | APURIMAC  | 37 (35 - 39) | ANDAHUAYLAS           | 1065  | 40 (37 - 43) |
| 2013 | Highlands | 32 (32 - 33) | AREQUIPA  | 38 (37 - 39) | AREQUIPA              | 12503 | 40 (39 - 41) |
| 2013 | Highlands | 32 (32 - 33) | AREQUIPA  | 38 (37 - 39) | CAMANA                | 1017  | 32 (29 - 35) |
| 2013 | Highlands | 32 (32 - 33) | AREQUIPA  | 38 (37 - 39) | CASTILLA              | 53    | 45 (32 - 60) |
| 2013 | Highlands | 32 (32 - 33) | AREQUIPA  | 38 (37 - 39) | CAYLLOMA              | 290   | 9 (6 - 12)   |
| 2013 | Highlands | 32 (32 - 33) | AREQUIPA  | 38 (37 - 39) | ISLAY                 | 42    | 0            |
| 2013 | Highlands | 32 (32 - 33) | AYACUCHO  | 27 (26 - 28) | CANGALLO              | 261   | 26 (21 - 32) |
| 2013 | Highlands | 32 (32 - 33) | AYACUCHO  | 27 (26 - 28) | HUAMANGA              | 3959  | 31 (29 - 32) |
| 2013 | Highlands | 32 (32 - 33) | AYACUCHO  | 27 (26 - 28) | HUANCA SANCOS         | 61    | 0            |
| 2013 | Highlands | 32 (32 - 33) | AYACUCHO  | 27 (26 - 28) | HUANTA                | 941   | 26 (23 - 29) |
| 2013 | Highlands | 32 (32 - 33) | AYACUCHO  | 27 (26 - 28) | LA MAR                | 576   | 26 (23 - 30) |
| 2013 | Highlands | 32 (32 - 33) | AYACUCHO  | 27 (26 - 28) | LUCANAS               | 371   | 13 (10 - 17) |
| 2013 | Highlands | 32 (32 - 33) | AYACUCHO  | 27 (26 - 28) | PARINACOCHAS          | 372   | 27 (22 - 31) |
| 2013 | Highlands | 32 (32 - 33) | AYACUCHO  | 27 (26 - 28) | SUCRE                 | 63    | 0            |
| 2013 | Highlands | 32 (32 - 33) | AYACUCHO  | 27 (26 - 28) | VICTOR FAJARDO        | 43    | 0            |
| 2013 | Highlands | 32 (32 - 33) | AYACUCHO  | 27 (26 - 28) | VILCAS HUAMAN         | 149   | 0            |
| 2013 | Highlands | 32 (32 - 33) | CAJAMARCA | 28 (27 - 30) | CAJABAMBA             | 444   | 18 (15 - 22) |
| 2013 | Highlands | 32 (32 - 33) | CAJAMARCA | 28 (27 - 30) | CAJAMARCA             | 3932  | 29 (28 - 30) |
| 2013 | Highlands | 32 (32 - 33) | CAJAMARCA | 28 (27 - 30) | CHOTA                 | 390   | 28 (24 - 33) |
| 2013 | Highlands | 32 (32 - 33) | CAJAMARCA | 28 (27 - 30) | JAEN                  | 806   | 44 (41 - 48) |
| 2013 | Highlands | 32 (32 - 33) | CAJAMARCA | 28 (27 - 30) | SAN IGNACIO           | 117   | 0            |



|      |           |              |              |              |                         |      |              |
|------|-----------|--------------|--------------|--------------|-------------------------|------|--------------|
| 2013 | Highlands | 32 (32 - 33) | CAJAMARCA    | 28 (27 - 30) | SAN MARCOS              | 233  | 0            |
| 2013 | Highlands | 32 (32 - 33) | CUSCO        | 33 (32 - 34) | ANTA                    | 79   | 0            |
| 2013 | Highlands | 32 (32 - 33) | CUSCO        | 33 (32 - 34) | CALCA                   | 180  | 0            |
| 2013 | Highlands | 32 (32 - 33) | CUSCO        | 33 (32 - 34) | CANCHIS                 | 1335 | 25 (23 - 28) |
| 2013 | Highlands | 32 (32 - 33) | CUSCO        | 33 (32 - 34) | CUSCO                   | 9280 | 36 (35 - 37) |
| 2013 | Highlands | 32 (32 - 33) | CUSCO        | 33 (32 - 34) | ESPINAR                 | 533  | 16 (13 - 20) |
| 2013 | Highlands | 32 (32 - 33) | CUSCO        | 33 (32 - 34) | LA CONVENCION           | 952  | 33 (30 - 36) |
| 2013 | Highlands | 32 (32 - 33) | CUSCO        | 33 (32 - 34) | URUBAMBA                | 100  | 0            |
| 2013 | Highlands | 32 (32 - 33) | HUANCAVELICA | 23 (21 - 24) | ACOBAMBA                | 472  | 7 (5 - 10)   |
| 2013 | Highlands | 32 (32 - 33) | HUANCAVELICA | 23 (21 - 24) | ANGARAES                | 330  | 13 (10 - 17) |
| 2013 | Highlands | 32 (32 - 33) | HUANCAVELICA | 23 (21 - 24) | HUANCAVELICA            | 1135 | 28 (26 - 31) |
| 2013 | Highlands | 32 (32 - 33) | HUANCAVELICA | 23 (21 - 24) | TAYACAJA                | 664  | 29 (26 - 33) |
| 2013 | Highlands | 32 (32 - 33) | HUANUCO      | 29 (28 - 30) | HUANUCO                 | 3539 | 33 (32 - 35) |
| 2013 | Highlands | 32 (32 - 33) | HUANUCO      | 29 (28 - 30) | LEONCIO PRADO           | 2413 | 25 (23 - 26) |
| 2013 | Highlands | 32 (32 - 33) | HUANUCO      | 29 (28 - 30) | PACHITEA                | 223  | 0            |
| 2013 | Highlands | 32 (32 - 33) | JUNIN        | 33 (31 - 35) | CHANCHAMAYO             | 793  | 36 (33 - 40) |
| 2013 | Highlands | 32 (32 - 33) | JUNIN        | 33 (31 - 35) | HUANCAYO                | 1548 | 33 (31 - 36) |
| 2013 | Highlands | 32 (32 - 33) | JUNIN        | 33 (31 - 35) | JAUJA                   | 399  | 26 (21 - 30) |
| 2013 | Highlands | 32 (32 - 33) | PUNO         | 31 (30 - 33) | PUNO                    | 2102 | 25 (24 - 27) |
| 2013 | Highlands | 32 (32 - 33) | PUNO         | 31 (30 - 33) | SAN ROMAN               | 2733 | 36 (34 - 38) |
| 2014 | Amazon    | 28 (28 - 29) | AMAZONAS     | 27 (25 - 28) | BAGUA                   | 851  | 43 (39 - 46) |
| 2014 | Amazon    | 28 (28 - 29) | AMAZONAS     | 27 (25 - 28) | BONGARA                 | 143  | 0            |
| 2014 | Amazon    | 28 (28 - 29) | AMAZONAS     | 27 (25 - 28) | CHACHAPOYAS             | 1414 | 24 (22 - 27) |
| 2014 | Amazon    | 28 (28 - 29) | AMAZONAS     | 27 (25 - 28) | CONDORCANQUI            | 113  | 15 (9 - 23)  |
| 2014 | Amazon    | 28 (28 - 29) | AMAZONAS     | 27 (25 - 28) | LUYA                    | 135  | 0            |
| 2014 | Amazon    | 28 (28 - 29) | AMAZONAS     | 27 (25 - 28) | RODRIGUEZ DE MENDOZA    | 161  | 0            |
| 2014 | Amazon    | 28 (28 - 29) | AMAZONAS     | 27 (25 - 28) | UTCUBAMBA               | 1039 | 29 (27 - 32) |
| 2014 | Amazon    | 28 (28 - 29) | LORETO       | 23 (22 - 25) | ALTO AMAZONAS           | 725  | 27 (24 - 31) |
| 2014 | Amazon    | 28 (28 - 29) | LORETO       | 23 (22 - 25) | DATEM DEL MARAÑON       | 132  | 1 (0 - 4)    |
| 2014 | Amazon    | 28 (28 - 29) | LORETO       | 23 (22 - 25) | LORETO                  | 177  | 1 (0 - 3)    |
| 2014 | Amazon    | 28 (28 - 29) | LORETO       | 23 (22 - 25) | MARISCAL RAMON CASTILLA | 86   | 0            |

|      |        |              |               |              |                   |        |              |
|------|--------|--------------|---------------|--------------|-------------------|--------|--------------|
| 2014 | Amazon | 28 (28 - 29) | LORETO        | 23 (22 - 25) | MAYNAS            | 2893   | 26 (24 - 27) |
| 2014 | Amazon | 28 (28 - 29) | MADRE DE DIOS | 24 (23 - 26) | TAHUAMANU         | 100    | 19 (12 - 28) |
| 2014 | Amazon | 28 (28 - 29) | MADRE DE DIOS | 24 (23 - 26) | TAMBOPATA         | 2050   | 25 (23 - 27) |
| 2014 | Amazon | 28 (28 - 29) | SAN MARTIN    | 53 (51 - 55) | MOYOBAMBA         | 187    | 43 (36 - 51) |
| 2014 | Amazon | 28 (28 - 29) | SAN MARTIN    | 53 (51 - 55) | SAN MARTIN        | 2946   | 54 (52 - 56) |
| 2014 | Amazon | 28 (28 - 29) | UCAYALI       | 23 (22 - 24) | ATALAYA           | 242    | 11 (7 - 15)  |
| 2014 | Amazon | 28 (28 - 29) | UCAYALI       | 23 (22 - 24) | CORONEL PORTILLO  | 6563   | 25 (24 - 26) |
| 2014 | Amazon | 28 (28 - 29) | UCAYALI       | 23 (22 - 24) | PADRE ABAD        | 662    | 4 (2 - 5)    |
| 2014 | Coast  | 38 (38 - 38) | CALLAO        | 34 (33 - 35) | CALLAO            | 11595  | 34 (33 - 35) |
| 2014 | Coast  | 38 (38 - 38) | ICA           | 35 (34 - 36) | CHINCHA           | 2891   | 39 (38 - 41) |
| 2014 | Coast  | 38 (38 - 38) | ICA           | 35 (34 - 36) | ICA               | 4001   | 33 (31 - 34) |
| 2014 | Coast  | 38 (38 - 38) | ICA           | 35 (34 - 36) | PISCO             | 728    | 30 (27 - 34) |
| 2014 | Coast  | 38 (38 - 38) | LA LIBERTAD   | 36 (35 - 37) | ASCOPE            | 554    | 28 (25 - 32) |
| 2014 | Coast  | 38 (38 - 38) | LA LIBERTAD   | 36 (35 - 37) | CHEPEN            | 1189   | 48 (45 - 51) |
| 2014 | Coast  | 38 (38 - 38) | LA LIBERTAD   | 36 (35 - 37) | GRAN CHIMU        | 94     | 0            |
| 2014 | Coast  | 38 (38 - 38) | LA LIBERTAD   | 36 (35 - 37) | OTUZCO            | 340    | 35 (30 - 40) |
| 2014 | Coast  | 38 (38 - 38) | LA LIBERTAD   | 36 (35 - 37) | PACASMAYO         | 1161   | 43 (40 - 46) |
| 2014 | Coast  | 38 (38 - 38) | LA LIBERTAD   | 36 (35 - 37) | PATAZ             | 82     | 0            |
| 2014 | Coast  | 38 (38 - 38) | LA LIBERTAD   | 36 (35 - 37) | SANCHEZ CARRION   | 163    | 1 (0 - 3)    |
| 2014 | Coast  | 38 (38 - 38) | LA LIBERTAD   | 36 (35 - 37) | SANTIAGO DE CHUCO | 127    | 31 (24 - 40) |
| 2014 | Coast  | 38 (38 - 38) | LA LIBERTAD   | 36 (35 - 37) | TRUJILLO          | 10774  | 37 (36 - 38) |
| 2014 | Coast  | 38 (38 - 38) | LA LIBERTAD   | 36 (35 - 37) | VIRU              | 473    | 0            |
| 2014 | Coast  | 38 (38 - 38) | LAMBAYEQUE    | 16 (15 - 16) | CHICLAYO          | 3037   | 14 (13 - 16) |
| 2014 | Coast  | 38 (38 - 38) | LAMBAYEQUE    | 16 (15 - 16) | FERREÑAFE         | 686    | 3 (2 - 5)    |
| 2014 | Coast  | 38 (38 - 38) | LAMBAYEQUE    | 16 (15 - 16) | LAMBAYEQUE        | 3201   | 19 (18 - 21) |
| 2014 | Coast  | 38 (38 - 38) | LIMA          | 39 (39 - 40) | CAÑETE            | 2508   | 39 (37 - 41) |
| 2014 | Coast  | 38 (38 - 38) | LIMA          | 39 (39 - 40) | HUARAL            | 1943   | 25 (23 - 27) |
| 2014 | Coast  | 38 (38 - 38) | LIMA          | 39 (39 - 40) | HUAROCHIRI        | 130    | 13 (8 - 20)  |
| 2014 | Coast  | 38 (38 - 38) | LIMA          | 39 (39 - 40) | HUAURA            | 2981   | 36 (35 - 38) |
| 2014 | Coast  | 38 (38 - 38) | LIMA          | 39 (39 - 40) | LIMA              | 108248 | 40 (40 - 40) |
| 2014 | Coast  | 38 (38 - 38) | MOQUEGUA      | 41 (39 - 43) | ILO               | 1173   | 42 (39 - 45) |

|      |           |              |          |              |                       |       |              |
|------|-----------|--------------|----------|--------------|-----------------------|-------|--------------|
| 2014 | Coast     | 38 (38 - 38) | MOQUEGUA | 41 (39 - 43) | MARISCAL NIETO        | 1267  | 39 (37 - 42) |
| 2014 | Coast     | 38 (38 - 38) | PIURA    | 40 (39 - 40) | AYABACA               | 178   | 0            |
| 2014 | Coast     | 38 (38 - 38) | PIURA    | 40 (39 - 40) | HUANCABAMBA           | 38    | 0            |
| 2014 | Coast     | 38 (38 - 38) | PIURA    | 40 (39 - 40) | MORROPON              | 1702  | 32 (30 - 34) |
| 2014 | Coast     | 38 (38 - 38) | PIURA    | 40 (39 - 40) | PAITA                 | 948   | 17 (15 - 20) |
| 2014 | Coast     | 38 (38 - 38) | PIURA    | 40 (39 - 40) | PIURA                 | 7755  | 48 (47 - 49) |
| 2014 | Coast     | 38 (38 - 38) | PIURA    | 40 (39 - 40) | SECHURA               | 352   | 0            |
| 2014 | Coast     | 38 (38 - 38) | PIURA    | 40 (39 - 40) | SULLANA               | 4402  | 42 (40 - 43) |
| 2014 | Coast     | 38 (38 - 38) | PIURA    | 40 (39 - 40) | TALARA                | 705   | 16 (13 - 19) |
| 2014 | Coast     | 38 (38 - 38) | TACNA    | 45 (43 - 46) | TACNA                 | 4242  | 45 (43 - 46) |
| 2014 | Coast     | 38 (38 - 38) | TUMBES   | 46 (44 - 47) | CONTRALMIRANTE VILLAR | 107   | 0            |
| 2014 | Coast     | 38 (38 - 38) | TUMBES   | 46 (44 - 47) | TUMBES                | 3498  | 51 (49 - 53) |
| 2014 | Coast     | 38 (38 - 38) | TUMBES   | 46 (44 - 47) | ZARUMILLA             | 275   | 0            |
| 2014 | Highlands | 32 (32 - 32) | ANCASH   | 46 (45 - 47) | HUARAZ                | 374   | 44 (39 - 49) |
| 2014 | Highlands | 32 (32 - 32) | ANCASH   | 46 (45 - 47) | HUAYLAS               | 749   | 24 (21 - 27) |
| 2014 | Highlands | 32 (32 - 32) | ANCASH   | 46 (45 - 47) | RECUAY                | 91    | 18 (10 - 27) |
| 2014 | Highlands | 32 (32 - 32) | ANCASH   | 46 (45 - 47) | SANTA                 | 3592  | 52 (50 - 54) |
| 2014 | Highlands | 32 (32 - 32) | APURIMAC | 35 (33 - 36) | ABANCAY               | 2406  | 35 (34 - 37) |
| 2014 | Highlands | 32 (32 - 32) | APURIMAC | 35 (33 - 36) | ANDAHUAYLAS           | 2009  | 38 (36 - 40) |
| 2014 | Highlands | 32 (32 - 32) | APURIMAC | 35 (33 - 36) | COTABAMBAS            | 409   | 15 (11 - 18) |
| 2014 | Highlands | 32 (32 - 32) | APURIMAC | 35 (33 - 36) | GRAU                  | 33    | 0            |
| 2014 | Highlands | 32 (32 - 32) | AREQUIPA | 41 (40 - 42) | AREQUIPA              | 20045 | 44 (43 - 44) |
| 2014 | Highlands | 32 (32 - 32) | AREQUIPA | 41 (40 - 42) | CAMANA                | 957   | 33 (30 - 36) |
| 2014 | Highlands | 32 (32 - 32) | AREQUIPA | 41 (40 - 42) | CARAVELI              | 195   | 0            |
| 2014 | Highlands | 32 (32 - 32) | AREQUIPA | 41 (40 - 42) | CASTILLA              | 456   | 25 (22 - 30) |
| 2014 | Highlands | 32 (32 - 32) | AREQUIPA | 41 (40 - 42) | CAYLLOMA              | 1149  | 20 (17 - 22) |
| 2014 | Highlands | 32 (32 - 32) | AREQUIPA | 41 (40 - 42) | ISLAY                 | 262   | 17 (13 - 22) |
| 2014 | Highlands | 32 (32 - 32) | AYACUCHO | 26 (25 - 27) | CANGALLO              | 431   | 28 (24 - 33) |
| 2014 | Highlands | 32 (32 - 32) | AYACUCHO | 26 (25 - 27) | HUAMANGA              | 5348  | 32 (31 - 34) |
| 2014 | Highlands | 32 (32 - 32) | AYACUCHO | 26 (25 - 27) | HUANCA SANCOS         | 80    | 0            |
| 2014 | Highlands | 32 (32 - 32) | AYACUCHO | 26 (25 - 27) | HUANTA                | 1368  | 20 (18 - 22) |

|      |           |              |              |              |                |       |              |
|------|-----------|--------------|--------------|--------------|----------------|-------|--------------|
| 2014 | Highlands | 32 (32 - 32) | AYACUCHO     | 26 (25 - 27) | LA MAR         | 1100  | 19 (16 - 21) |
| 2014 | Highlands | 32 (32 - 32) | AYACUCHO     | 26 (25 - 27) | LUCANAS        | 455   | 15 (12 - 18) |
| 2014 | Highlands | 32 (32 - 32) | AYACUCHO     | 26 (25 - 27) | PARINACOCHAS   | 455   | 13 (10 - 17) |
| 2014 | Highlands | 32 (32 - 32) | AYACUCHO     | 26 (25 - 27) | SUCRE          | 55    | 0            |
| 2014 | Highlands | 32 (32 - 32) | AYACUCHO     | 26 (25 - 27) | VICTOR FAJARDO | 66    | 0            |
| 2014 | Highlands | 32 (32 - 32) | AYACUCHO     | 26 (25 - 27) | VILCAS HUAMAN  | 154   | 0            |
| 2014 | Highlands | 32 (32 - 32) | CAJAMARCA    | 24 (23 - 25) | CAJABAMBA      | 815   | 15 (13 - 18) |
| 2014 | Highlands | 32 (32 - 32) | CAJAMARCA    | 24 (23 - 25) | CAJAMARCA      | 4899  | 22 (21 - 24) |
| 2014 | Highlands | 32 (32 - 32) | CAJAMARCA    | 24 (23 - 25) | CELENDIN       | 438   | 3 (2 - 6)    |
| 2014 | Highlands | 32 (32 - 32) | CAJAMARCA    | 24 (23 - 25) | CHOTA          | 1431  | 29 (27 - 31) |
| 2014 | Highlands | 32 (32 - 32) | CAJAMARCA    | 24 (23 - 25) | CUTERVO        | 797   | 28 (25 - 31) |
| 2014 | Highlands | 32 (32 - 32) | CAJAMARCA    | 24 (23 - 25) | HUALGAYOC      | 35    | 6 (1 - 19)   |
| 2014 | Highlands | 32 (32 - 32) | CAJAMARCA    | 24 (23 - 25) | JAEN           | 1807  | 44 (42 - 46) |
| 2014 | Highlands | 32 (32 - 32) | CAJAMARCA    | 24 (23 - 25) | SAN IGNACIO    | 442   | 0            |
| 2014 | Highlands | 32 (32 - 32) | CAJAMARCA    | 24 (23 - 25) | SAN MARCOS     | 335   | 0            |
| 2014 | Highlands | 32 (32 - 32) | CAJAMARCA    | 24 (23 - 25) | SANTA CRUZ     | 61    | 7 (2 - 16)   |
| 2014 | Highlands | 32 (32 - 32) | CUSCO        | 31 (30 - 32) | ANTA           | 360   | 0            |
| 2014 | Highlands | 32 (32 - 32) | CUSCO        | 31 (30 - 32) | CALCA          | 622   | 0            |
| 2014 | Highlands | 32 (32 - 32) | CUSCO        | 31 (30 - 32) | CANCHIS        | 1459  | 29 (27 - 32) |
| 2014 | Highlands | 32 (32 - 32) | CUSCO        | 31 (30 - 32) | CUSCO          | 11535 | 37 (36 - 38) |
| 2014 | Highlands | 32 (32 - 32) | CUSCO        | 31 (30 - 32) | ESPINAR        | 690   | 10 (8 - 12)  |
| 2014 | Highlands | 32 (32 - 32) | CUSCO        | 31 (30 - 32) | LA CONVENCION  | 1438  | 27 (25 - 29) |
| 2014 | Highlands | 32 (32 - 32) | CUSCO        | 31 (30 - 32) | URUBAMBA       | 414   | 0            |
| 2014 | Highlands | 32 (32 - 32) | HUANCAVELICA | 21 (20 - 23) | ACOBAMBA       | 688   | 11 (8 - 13)  |
| 2014 | Highlands | 32 (32 - 32) | HUANCAVELICA | 21 (20 - 23) | ANGARAES       | 532   | 15 (12 - 18) |
| 2014 | Highlands | 32 (32 - 32) | HUANCAVELICA | 21 (20 - 23) | CHURCAMPA      | 108   | 1 (0 - 5)    |
| 2014 | Highlands | 32 (32 - 32) | HUANCAVELICA | 21 (20 - 23) | HUANCAVELICA   | 1962  | 28 (26 - 30) |
| 2014 | Highlands | 32 (32 - 32) | HUANCAVELICA | 21 (20 - 23) | TAYACAJA       | 961   | 23 (20 - 25) |
| 2014 | Highlands | 32 (32 - 32) | HUANUCO      | 24 (23 - 25) | AMBO           | 316   | 0            |
| 2014 | Highlands | 32 (32 - 32) | HUANUCO      | 24 (23 - 25) | DOS DE MAYO    | 208   | 8 (5 - 13)   |
| 2014 | Highlands | 32 (32 - 32) | HUANUCO      | 24 (23 - 25) | HUACAYBAMBA    | 46    | 0            |

|      |           |              |          |              |                      |      |              |
|------|-----------|--------------|----------|--------------|----------------------|------|--------------|
| 2014 | Highlands | 32 (32 - 32) | HUANUCO  | 24 (23 - 25) | HUAMALIES            | 266  | 9 (6 - 13)   |
| 2014 | Highlands | 32 (32 - 32) | HUANUCO  | 24 (23 - 25) | HUANUCO              | 5304 | 29 (28 - 31) |
| 2014 | Highlands | 32 (32 - 32) | HUANUCO  | 24 (23 - 25) | LEONCIO PRADO        | 2668 | 25 (24 - 27) |
| 2014 | Highlands | 32 (32 - 32) | HUANUCO  | 24 (23 - 25) | PACHITEA             | 513  | 0            |
| 2014 | Highlands | 32 (32 - 32) | HUANUCO  | 24 (23 - 25) | PUERTO INCA          | 52   | 0            |
| 2014 | Highlands | 32 (32 - 32) | HUANUCO  | 24 (23 - 25) | YAROWILCA            | 39   | 0            |
| 2014 | Highlands | 32 (32 - 32) | JUNIN    | 35 (34 - 36) | CHANCHAMAYO          | 2088 | 36 (34 - 38) |
| 2014 | Highlands | 32 (32 - 32) | JUNIN    | 35 (34 - 36) | HUANCAYO             | 5453 | 37 (36 - 38) |
| 2014 | Highlands | 32 (32 - 32) | JUNIN    | 35 (34 - 36) | JAUJA                | 1090 | 20 (18 - 23) |
| 2014 | Highlands | 32 (32 - 32) | PASCO    | 29 (27 - 30) | OXAPAMPA             | 569  | 28 (25 - 32) |
| 2014 | Highlands | 32 (32 - 32) | PASCO    | 29 (27 - 30) | PASCO                | 1632 | 29 (26 - 31) |
| 2014 | Highlands | 32 (32 - 32) | PUNO     | 31 (30 - 32) | AZANGARO             | 36   | 3 (0 - 15)   |
| 2014 | Highlands | 32 (32 - 32) | PUNO     | 31 (30 - 32) | CARABAYA             | 171  | 8 (5 - 13)   |
| 2014 | Highlands | 32 (32 - 32) | PUNO     | 31 (30 - 32) | CHUCUITO             | 211  | 10 (7 - 15)  |
| 2014 | Highlands | 32 (32 - 32) | PUNO     | 31 (30 - 32) | EL COLLAO            | 452  | 15 (12 - 18) |
| 2014 | Highlands | 32 (32 - 32) | PUNO     | 31 (30 - 32) | HUANCANE             | 179  | 8 (5 - 13)   |
| 2014 | Highlands | 32 (32 - 32) | PUNO     | 31 (30 - 32) | LAMPA                | 105  | 19 (12 - 28) |
| 2014 | Highlands | 32 (32 - 32) | PUNO     | 31 (30 - 32) | MELGAR               | 388  | 34 (29 - 38) |
| 2014 | Highlands | 32 (32 - 32) | PUNO     | 31 (30 - 32) | PUNO                 | 2239 | 26 (24 - 28) |
| 2014 | Highlands | 32 (32 - 32) | PUNO     | 31 (30 - 32) | SAN ROMAN            | 3575 | 41 (39 - 42) |
| 2014 | Highlands | 32 (32 - 32) | PUNO     | 31 (30 - 32) | SANDIA               | 88   | 27 (18 - 38) |
| 2014 | Highlands | 32 (32 - 32) | PUNO     | 31 (30 - 32) | YUNGUYO              | 153  | 7 (4 - 12)   |
| 2015 | Amazon    | 28 (28 - 29) | AMAZONAS | 28 (27 - 29) | BAGUA                | 1132 | 39 (37 - 42) |
| 2015 | Amazon    | 28 (28 - 29) | AMAZONAS | 28 (27 - 29) | BONGARA              | 177  | 0            |
| 2015 | Amazon    | 28 (28 - 29) | AMAZONAS | 28 (27 - 29) | CHACHAPOYAS          | 1481 | 29 (27 - 32) |
| 2015 | Amazon    | 28 (28 - 29) | AMAZONAS | 28 (27 - 29) | CONDORCANQUI         | 186  | 10 (6 - 15)  |
| 2015 | Amazon    | 28 (28 - 29) | AMAZONAS | 28 (27 - 29) | LUYA                 | 146  | 0            |
| 2015 | Amazon    | 28 (28 - 29) | AMAZONAS | 28 (27 - 29) | RODRIGUEZ DE MENDOZA | 157  | 0            |
| 2015 | Amazon    | 28 (28 - 29) | AMAZONAS | 28 (27 - 29) | UTCUBAMBA            | 1256 | 29 (27 - 32) |
| 2015 | Amazon    | 28 (28 - 29) | LORETO   | 25 (24 - 25) | ALTO AMAZONAS        | 2231 | 25 (23 - 27) |
| 2015 | Amazon    | 28 (28 - 29) | LORETO   | 25 (24 - 25) | DATEM DEL MARAÑON    | 253  | 0            |

|      |        |              |               |              |                         |       |              |
|------|--------|--------------|---------------|--------------|-------------------------|-------|--------------|
| 2015 | Amazon | 28 (28 - 29) | LORETO        | 25 (24 - 25) | LORETO                  | 447   | 1 (0 - 2)    |
| 2015 | Amazon | 28 (28 - 29) | LORETO        | 25 (24 - 25) | MARISCAL RAMON CASTILLA | 265   | 0            |
| 2015 | Amazon | 28 (28 - 29) | LORETO        | 25 (24 - 25) | MAYNAS                  | 8485  | 27 (26 - 28) |
| 2015 | Amazon | 28 (28 - 29) | LORETO        | 25 (24 - 25) | UCAYALI                 | 41    | 0            |
| 2015 | Amazon | 28 (28 - 29) | MADRE DE DIOS | 30 (28 - 31) | TAHUAMANU               | 137   | 23 (16 - 31) |
| 2015 | Amazon | 28 (28 - 29) | MADRE DE DIOS | 30 (28 - 31) | TAMBOPATA               | 2668  | 30 (28 - 32) |
| 2015 | Amazon | 28 (28 - 29) | SAN MARTIN    | 36 (35 - 37) | BELLAVISTA              | 368   | 0            |
| 2015 | Amazon | 28 (28 - 29) | SAN MARTIN    | 36 (35 - 37) | EL DORADO               | 419   | 0            |
| 2015 | Amazon | 28 (28 - 29) | SAN MARTIN    | 36 (35 - 37) | LAMAS                   | 316   | 0            |
| 2015 | Amazon | 28 (28 - 29) | SAN MARTIN    | 36 (35 - 37) | MARISCAL CACERES        | 790   | 30 (27 - 33) |
| 2015 | Amazon | 28 (28 - 29) | SAN MARTIN    | 36 (35 - 37) | MOYOBAMBA               | 2056  | 32 (30 - 34) |
| 2015 | Amazon | 28 (28 - 29) | SAN MARTIN    | 36 (35 - 37) | RIOJA                   | 1759  | 31 (29 - 33) |
| 2015 | Amazon | 28 (28 - 29) | SAN MARTIN    | 36 (35 - 37) | SAN MARTIN              | 4258  | 51 (50 - 53) |
| 2015 | Amazon | 28 (28 - 29) | SAN MARTIN    | 36 (35 - 37) | TOCACHE                 | 838   | 30 (27 - 34) |
| 2015 | Amazon | 28 (28 - 29) | UCAYALI       | 25 (24 - 26) | ATALAYA                 | 533   | 8 (5 - 10)   |
| 2015 | Amazon | 28 (28 - 29) | UCAYALI       | 25 (24 - 26) | CORONEL PORTILLO        | 8924  | 27 (27 - 28) |
| 2015 | Amazon | 28 (28 - 29) | UCAYALI       | 25 (24 - 26) | PADRE ABAD              | 556   | 1 (1 - 3)    |
| 2015 | Coast  | 40 (40 - 40) | CALLAO        | 36 (35 - 37) | CALLAO                  | 16863 | 36 (35 - 37) |
| 2015 | Coast  | 40 (40 - 40) | ICA           | 39 (38 - 40) | CHINCHA                 | 3890  | 37 (35 - 38) |
| 2015 | Coast  | 40 (40 - 40) | ICA           | 39 (38 - 40) | ICA                     | 8149  | 42 (41 - 44) |
| 2015 | Coast  | 40 (40 - 40) | ICA           | 39 (38 - 40) | NAZCA                   | 418   | 24 (20 - 28) |
| 2015 | Coast  | 40 (40 - 40) | ICA           | 39 (38 - 40) | PISCO                   | 2870  | 36 (34 - 38) |
| 2015 | Coast  | 40 (40 - 40) | LA LIBERTAD   | 37 (36 - 38) | ASCOPE                  | 1270  | 29 (27 - 32) |
| 2015 | Coast  | 40 (40 - 40) | LA LIBERTAD   | 37 (36 - 38) | CHEPEN                  | 1183  | 43 (40 - 46) |
| 2015 | Coast  | 40 (40 - 40) | LA LIBERTAD   | 37 (36 - 38) | GRAN CHIMU              | 70    | 0            |
| 2015 | Coast  | 40 (40 - 40) | LA LIBERTAD   | 37 (36 - 38) | JULCAN                  | 121   | 0            |
| 2015 | Coast  | 40 (40 - 40) | LA LIBERTAD   | 37 (36 - 38) | OTUZCO                  | 483   | 33 (28 - 37) |
| 2015 | Coast  | 40 (40 - 40) | LA LIBERTAD   | 37 (36 - 38) | PACASMAYO               | 1155  | 43 (40 - 46) |
| 2015 | Coast  | 40 (40 - 40) | LA LIBERTAD   | 37 (36 - 38) | PATAZ                   | 184   | 5 (3 - 10)   |
| 2015 | Coast  | 40 (40 - 40) | LA LIBERTAD   | 37 (36 - 38) | SANCHEZ CARRION         | 1112  | 26 (23 - 28) |
| 2015 | Coast  | 40 (40 - 40) | LA LIBERTAD   | 37 (36 - 38) | SANTIAGO DE CHUCO       | 593   | 25 (21 - 28) |

|      |           |              |             |              |                       |        |              |
|------|-----------|--------------|-------------|--------------|-----------------------|--------|--------------|
| 2015 | Coast     | 40 (40 - 40) | LA LIBERTAD | 37 (36 - 38) | TRUJILLO              | 15325  | 40 (40 - 41) |
| 2015 | Coast     | 40 (40 - 40) | LA LIBERTAD | 37 (36 - 38) | VIRU                  | 542    | 0            |
| 2015 | Coast     | 40 (40 - 40) | LAMBAYEQUE  | 28 (27 - 29) | CHICLAYO              | 9384   | 33 (32 - 34) |
| 2015 | Coast     | 40 (40 - 40) | LAMBAYEQUE  | 28 (27 - 29) | FERREÑAFE             | 740    | 6 (5 - 8)    |
| 2015 | Coast     | 40 (40 - 40) | LAMBAYEQUE  | 28 (27 - 29) | LAMBAYEQUE            | 3896   | 20 (19 - 21) |
| 2015 | Coast     | 40 (40 - 40) | LIMA        | 42 (42 - 42) | BARRANCA              | 1363   | 41 (38 - 44) |
| 2015 | Coast     | 40 (40 - 40) | LIMA        | 42 (42 - 42) | CAÑETE                | 2997   | 37 (35 - 38) |
| 2015 | Coast     | 40 (40 - 40) | LIMA        | 42 (42 - 42) | HUARAL                | 2821   | 24 (22 - 26) |
| 2015 | Coast     | 40 (40 - 40) | LIMA        | 42 (42 - 42) | HUAROCHIRI            | 171    | 8 (5 - 13)   |
| 2015 | Coast     | 40 (40 - 40) | LIMA        | 42 (42 - 42) | HUAURA                | 2967   | 38 (37 - 40) |
| 2015 | Coast     | 40 (40 - 40) | LIMA        | 42 (42 - 42) | LIMA                  | 131510 | 43 (42 - 43) |
| 2015 | Coast     | 40 (40 - 40) | MOQUEGUA    | 40 (38 - 42) | GENERAL SANCHEZ CERRO | 35     | 0            |
| 2015 | Coast     | 40 (40 - 40) | MOQUEGUA    | 40 (38 - 42) | ILO                   | 1187   | 43 (40 - 45) |
| 2015 | Coast     | 40 (40 - 40) | MOQUEGUA    | 40 (38 - 42) | MARISCAL NIETO        | 1349   | 39 (37 - 42) |
| 2015 | Coast     | 40 (40 - 40) | PIURA       | 36 (36 - 37) | AYABACA               | 442    | 0            |
| 2015 | Coast     | 40 (40 - 40) | PIURA       | 36 (36 - 37) | HUANCABAMBA           | 490    | 4 (3 - 6)    |
| 2015 | Coast     | 40 (40 - 40) | PIURA       | 36 (36 - 37) | MORROPON              | 2051   | 28 (26 - 30) |
| 2015 | Coast     | 40 (40 - 40) | PIURA       | 36 (36 - 37) | PAITA                 | 1381   | 16 (14 - 18) |
| 2015 | Coast     | 40 (40 - 40) | PIURA       | 36 (36 - 37) | PIURA                 | 9660   | 43 (42 - 44) |
| 2015 | Coast     | 40 (40 - 40) | PIURA       | 36 (36 - 37) | SECHURA               | 597    | 7 (5 - 9)    |
| 2015 | Coast     | 40 (40 - 40) | PIURA       | 36 (36 - 37) | SULLANA               | 4307   | 46 (44 - 47) |
| 2015 | Coast     | 40 (40 - 40) | PIURA       | 36 (36 - 37) | TALARA                | 927    | 21 (19 - 24) |
| 2015 | Coast     | 40 (40 - 40) | TACNA       | 47 (45 - 48) | TACNA                 | 5080   | 47 (45 - 48) |
| 2015 | Coast     | 40 (40 - 40) | TUMBES      | 51 (49 - 52) | CONTRALMIRANTE VILLAR | 121    | 0            |
| 2015 | Coast     | 40 (40 - 40) | TUMBES      | 51 (49 - 52) | TUMBES                | 3844   | 56 (54 - 57) |
| 2015 | Coast     | 40 (40 - 40) | TUMBES      | 51 (49 - 52) | ZARUMILLA             | 264    | 0            |
| 2015 | Highlands | 30 (30 - 30) | ANCASH      | 34 (33 - 35) | CARHUAZ               | 528    | 1 (0 - 2)    |
| 2015 | Highlands | 30 (30 - 30) | ANCASH      | 34 (33 - 35) | HUARAZ                | 3713   | 33 (32 - 35) |
| 2015 | Highlands | 30 (30 - 30) | ANCASH      | 34 (33 - 35) | HUARI                 | 542    | 23 (19 - 26) |
| 2015 | Highlands | 30 (30 - 30) | ANCASH      | 34 (33 - 35) | HUAYLAS               | 799    | 27 (24 - 30) |
| 2015 | Highlands | 30 (30 - 30) | ANCASH      | 34 (33 - 35) | POMABAMBA             | 305    | 18 (14 - 22) |

|      |           |              |           |              |                      |       |              |
|------|-----------|--------------|-----------|--------------|----------------------|-------|--------------|
| 2015 | Highlands | 30 (30 - 30) | ANCASH    | 34 (33 - 35) | RECUAY               | 139   | 14 (9 - 21)  |
| 2015 | Highlands | 30 (30 - 30) | ANCASH    | 34 (33 - 35) | SANTA                | 5659  | 44 (43 - 45) |
| 2015 | Highlands | 30 (30 - 30) | ANCASH    | 34 (33 - 35) | SIHUAS               | 210   | 0            |
| 2015 | Highlands | 30 (30 - 30) | ANCASH    | 34 (33 - 35) | YUNGAY               | 368   | 0            |
| 2015 | Highlands | 30 (30 - 30) | APURIMAC  | 31 (30 - 32) | ABANCAY              | 2685  | 39 (37 - 41) |
| 2015 | Highlands | 30 (30 - 30) | APURIMAC  | 31 (30 - 32) | ANDAHUAYLAS          | 2262  | 33 (31 - 35) |
| 2015 | Highlands | 30 (30 - 30) | APURIMAC  | 31 (30 - 32) | ANTABAMBA            | 43    | 0            |
| 2015 | Highlands | 30 (30 - 30) | APURIMAC  | 31 (30 - 32) | AYMARAES             | 44    | 0            |
| 2015 | Highlands | 30 (30 - 30) | APURIMAC  | 31 (30 - 32) | CHINCHEROS           | 208   | 5 (2 - 9)    |
| 2015 | Highlands | 30 (30 - 30) | APURIMAC  | 31 (30 - 32) | COTABAMBAS           | 701   | 10 (8 - 13)  |
| 2015 | Highlands | 30 (30 - 30) | APURIMAC  | 31 (30 - 32) | GRAU                 | 133   | 0            |
| 2015 | Highlands | 30 (30 - 30) | AREQUIPA  | 42 (42 - 43) | AREQUIPA             | 20571 | 45 (45 - 46) |
| 2015 | Highlands | 30 (30 - 30) | AREQUIPA  | 42 (42 - 43) | CAMANA               | 981   | 35 (32 - 38) |
| 2015 | Highlands | 30 (30 - 30) | AREQUIPA  | 42 (42 - 43) | CARAVELI             | 190   | 0            |
| 2015 | Highlands | 30 (30 - 30) | AREQUIPA  | 42 (42 - 43) | CASTILLA             | 405   | 28 (23 - 32) |
| 2015 | Highlands | 30 (30 - 30) | AREQUIPA  | 42 (42 - 43) | CAYLLOMA             | 1194  | 19 (17 - 21) |
| 2015 | Highlands | 30 (30 - 30) | AREQUIPA  | 42 (42 - 43) | CONDESUYOS           | 49    | 2 (0 - 11)   |
| 2015 | Highlands | 30 (30 - 30) | AREQUIPA  | 42 (42 - 43) | ISLAY                | 455   | 31 (26 - 35) |
| 2015 | Highlands | 30 (30 - 30) | AYACUCHO  | 25 (24 - 26) | CANGALLO             | 464   | 20 (16 - 24) |
| 2015 | Highlands | 30 (30 - 30) | AYACUCHO  | 25 (24 - 26) | HUAMANGA             | 6482  | 32 (31 - 33) |
| 2015 | Highlands | 30 (30 - 30) | AYACUCHO  | 25 (24 - 26) | HUANCA SANCOS        | 81    | 0            |
| 2015 | Highlands | 30 (30 - 30) | AYACUCHO  | 25 (24 - 26) | HUANTA               | 1615  | 18 (16 - 20) |
| 2015 | Highlands | 30 (30 - 30) | AYACUCHO  | 25 (24 - 26) | LA MAR               | 1483  | 14 (12 - 16) |
| 2015 | Highlands | 30 (30 - 30) | AYACUCHO  | 25 (24 - 26) | LUCANAS              | 495   | 12 (10 - 16) |
| 2015 | Highlands | 30 (30 - 30) | AYACUCHO  | 25 (24 - 26) | PARINACOCHAS         | 479   | 24 (20 - 28) |
| 2015 | Highlands | 30 (30 - 30) | AYACUCHO  | 25 (24 - 26) | PAUCAR DEL SARA SARA | 65    | 0            |
| 2015 | Highlands | 30 (30 - 30) | AYACUCHO  | 25 (24 - 26) | SUCRE                | 70    | 0            |
| 2015 | Highlands | 30 (30 - 30) | AYACUCHO  | 25 (24 - 26) | VICTOR FAJARDO       | 55    | 0            |
| 2015 | Highlands | 30 (30 - 30) | AYACUCHO  | 25 (24 - 26) | VILCAS HUAMAN        | 149   | 0            |
| 2015 | Highlands | 30 (30 - 30) | CAJAMARCA | 23 (22 - 24) | CAJABAMBA            | 899   | 17 (15 - 20) |
| 2015 | Highlands | 30 (30 - 30) | CAJAMARCA | 23 (22 - 24) | CAJAMARCA            | 6220  | 22 (21 - 23) |



|      |           |              |             |              |               |       |              |
|------|-----------|--------------|-------------|--------------|---------------|-------|--------------|
| 2015 | Highlands | 30 (30 - 30) | CAJAMARCA   | 23 (22 - 24) | CELENDIN      | 506   | 1 (0 - 2)    |
| 2015 | Highlands | 30 (30 - 30) | CAJAMARCA   | 23 (22 - 24) | CHOTA         | 1556  | 31 (29 - 34) |
| 2015 | Highlands | 30 (30 - 30) | CAJAMARCA   | 23 (22 - 24) | CONTUMAZA     | 55    | 0            |
| 2015 | Highlands | 30 (30 - 30) | CAJAMARCA   | 23 (22 - 24) | CUTERVO       | 961   | 29 (26 - 32) |
| 2015 | Highlands | 30 (30 - 30) | CAJAMARCA   | 23 (22 - 24) | HUALGAYOC     | 615   | 12 (10 - 15) |
| 2015 | Highlands | 30 (30 - 30) | CAJAMARCA   | 23 (22 - 24) | JAEN          | 2432  | 37 (35 - 39) |
| 2015 | Highlands | 30 (30 - 30) | CAJAMARCA   | 23 (22 - 24) | SAN IGNACIO   | 595   | 0            |
| 2015 | Highlands | 30 (30 - 30) | CAJAMARCA   | 23 (22 - 24) | SAN MARCOS    | 309   | 0            |
| 2015 | Highlands | 30 (30 - 30) | CAJAMARCA   | 23 (22 - 24) | SANTA CRUZ    | 155   | 4 (1 - 8)    |
| 2015 | Highlands | 30 (30 - 30) | CUSCO       | 31 (30 - 32) | ANTA          | 328   | 0            |
| 2015 | Highlands | 30 (30 - 30) | CUSCO       | 31 (30 - 32) | CALCA         | 562   | 0            |
| 2015 | Highlands | 30 (30 - 30) | CUSCO       | 31 (30 - 32) | CANAS         | 120   | 0            |
| 2015 | Highlands | 30 (30 - 30) | CUSCO       | 31 (30 - 32) | CANCHIS       | 1898  | 22 (20 - 24) |
| 2015 | Highlands | 30 (30 - 30) | CUSCO       | 31 (30 - 32) | CHUMBIVILCAS  | 82    | 17 (10 - 27) |
| 2015 | Highlands | 30 (30 - 30) | CUSCO       | 31 (30 - 32) | CUSCO         | 12238 | 40 (39 - 41) |
| 2015 | Highlands | 30 (30 - 30) | CUSCO       | 31 (30 - 32) | ESPINAR       | 722   | 6 (5 - 8)    |
| 2015 | Highlands | 30 (30 - 30) | CUSCO       | 31 (30 - 32) | LA CONVENCION | 2329  | 24 (23 - 26) |
| 2015 | Highlands | 30 (30 - 30) | CUSCO       | 31 (30 - 32) | QUISPICANCHI  | 447   | 0            |
| 2015 | Highlands | 30 (30 - 30) | CUSCO       | 31 (30 - 32) | URUBAMBA      | 381   | 0            |
| 2015 | Highlands | 30 (30 - 30) | HUANCVELICA | 19 (18 - 21) | ACOBAMBA      | 616   | 12 (9 - 15)  |
| 2015 | Highlands | 30 (30 - 30) | HUANCVELICA | 19 (18 - 21) | ANGARAES      | 647   | 15 (13 - 18) |
| 2015 | Highlands | 30 (30 - 30) | HUANCVELICA | 19 (18 - 21) | CHURCAMP      | 431   | 0            |
| 2015 | Highlands | 30 (30 - 30) | HUANCVELICA | 19 (18 - 21) | HUANCVELICA   | 2335  | 27 (25 - 29) |
| 2015 | Highlands | 30 (30 - 30) | HUANCVELICA | 19 (18 - 21) | HUAYTARA      | 69    | 0            |
| 2015 | Highlands | 30 (30 - 30) | HUANCVELICA | 19 (18 - 21) | TAYACAJA      | 907   | 19 (16 - 21) |
| 2015 | Highlands | 30 (30 - 30) | HUANUCO     | 21 (21 - 22) | AMBO          | 452   | 0            |
| 2015 | Highlands | 30 (30 - 30) | HUANUCO     | 21 (21 - 22) | DOS DE MAYO   | 373   | 7 (5 - 10)   |
| 2015 | Highlands | 30 (30 - 30) | HUANUCO     | 21 (21 - 22) | HUACAYBAMBA   | 104   | 0            |
| 2015 | Highlands | 30 (30 - 30) | HUANUCO     | 21 (21 - 22) | HUAMALIES     | 632   | 8 (6 - 10)   |
| 2015 | Highlands | 30 (30 - 30) | HUANUCO     | 21 (21 - 22) | HUANUCO       | 6175  | 27 (26 - 28) |
| 2015 | Highlands | 30 (30 - 30) | HUANUCO     | 21 (21 - 22) | LAURICOCHA    | 73    | 0            |

|      |           |              |          |              |                        |      |              |
|------|-----------|--------------|----------|--------------|------------------------|------|--------------|
| 2015 | Highlands | 30 (30 - 30) | HUANUCO  | 21 (21 - 22) | LEONCIO PRADO          | 3166 | 28 (26 - 29) |
| 2015 | Highlands | 30 (30 - 30) | HUANUCO  | 21 (21 - 22) | MARAÑÓN                | 69   | 0            |
| 2015 | Highlands | 30 (30 - 30) | HUANUCO  | 21 (21 - 22) | PACHITEA               | 853  | 0            |
| 2015 | Highlands | 30 (30 - 30) | HUANUCO  | 21 (21 - 22) | PUERTO INCA            | 195  | 0            |
| 2015 | Highlands | 30 (30 - 30) | HUANUCO  | 21 (21 - 22) | YAROWILCA              | 201  | 0            |
| 2015 | Highlands | 30 (30 - 30) | JUNIN    | 31 (30 - 31) | CHANCHAMAYO            | 2286 | 38 (36 - 40) |
| 2015 | Highlands | 30 (30 - 30) | JUNIN    | 31 (30 - 31) | CHUPACA                | 260  | 0            |
| 2015 | Highlands | 30 (30 - 30) | JUNIN    | 31 (30 - 31) | CONCEPCION             | 150  | 0            |
| 2015 | Highlands | 30 (30 - 30) | JUNIN    | 31 (30 - 31) | HUANCAYO               | 7146 | 34 (33 - 35) |
| 2015 | Highlands | 30 (30 - 30) | JUNIN    | 31 (30 - 31) | JAUJA                  | 1034 | 22 (20 - 25) |
| 2015 | Highlands | 30 (30 - 30) | JUNIN    | 31 (30 - 31) | JUNIN                  | 188  | 8 (5 - 13)   |
| 2015 | Highlands | 30 (30 - 30) | JUNIN    | 31 (30 - 31) | SATIPO                 | 901  | 26 (23 - 29) |
| 2015 | Highlands | 30 (30 - 30) | JUNIN    | 31 (30 - 31) | TARMA                  | 648  | 14 (12 - 17) |
| 2015 | Highlands | 30 (30 - 30) | JUNIN    | 31 (30 - 31) | YAULI                  | 174  | 20 (14 - 26) |
| 2015 | Highlands | 30 (30 - 30) | PASCO    | 21 (20 - 22) | DANIEL ALCIDES CARRION | 157  | 0            |
| 2015 | Highlands | 30 (30 - 30) | PASCO    | 21 (20 - 22) | OXAPAMPA               | 1502 | 18 (16 - 20) |
| 2015 | Highlands | 30 (30 - 30) | PASCO    | 21 (20 - 22) | PASCO                  | 2540 | 24 (22 - 26) |
| 2015 | Highlands | 30 (30 - 30) | PUNO     | 26 (26 - 27) | AZANGARO               | 683  | 9 (7 - 12)   |
| 2015 | Highlands | 30 (30 - 30) | PUNO     | 26 (26 - 27) | CARABAYA               | 325  | 7 (5 - 11)   |
| 2015 | Highlands | 30 (30 - 30) | PUNO     | 26 (26 - 27) | CHUCUITO               | 616  | 9 (7 - 11)   |
| 2015 | Highlands | 30 (30 - 30) | PUNO     | 26 (26 - 27) | EL COLLAO              | 811  | 13 (10 - 15) |
| 2015 | Highlands | 30 (30 - 30) | PUNO     | 26 (26 - 27) | HUANCANE               | 435  | 6 (4 - 9)    |
| 2015 | Highlands | 30 (30 - 30) | PUNO     | 26 (26 - 27) | LAMPA                  | 215  | 11 (7 - 16)  |
| 2015 | Highlands | 30 (30 - 30) | PUNO     | 26 (26 - 27) | MELGAR                 | 728  | 23 (20 - 26) |
| 2015 | Highlands | 30 (30 - 30) | PUNO     | 26 (26 - 27) | MOHO                   | 35   | 0            |
| 2015 | Highlands | 30 (30 - 30) | PUNO     | 26 (26 - 27) | PUNO                   | 3020 | 30 (28 - 32) |
| 2015 | Highlands | 30 (30 - 30) | PUNO     | 26 (26 - 27) | SAN ROMAN              | 4564 | 38 (37 - 40) |
| 2015 | Highlands | 30 (30 - 30) | PUNO     | 26 (26 - 27) | SANDIA                 | 190  | 13 (8 - 18)  |
| 2015 | Highlands | 30 (30 - 30) | PUNO     | 26 (26 - 27) | YUNGUYO                | 358  | 7 (5 - 10)   |
| 2016 | Amazon    | 28 (27 - 28) | AMAZONAS | 29 (27 - 30) | BAGUA                  | 1135 | 46 (43 - 49) |
| 2016 | Amazon    | 28 (27 - 28) | AMAZONAS | 29 (27 - 30) | BONGARA                | 212  | 0            |

|      |        |              |               |              |                         |       |              |
|------|--------|--------------|---------------|--------------|-------------------------|-------|--------------|
| 2016 | Amazon | 28 (27 - 28) | AMAZONAS      | 29 (27 - 30) | CHACHAPOYAS             | 1613  | 33 (31 - 36) |
| 2016 | Amazon | 28 (27 - 28) | AMAZONAS      | 29 (27 - 30) | CONDORCANQUI            | 400   | 9 (6 - 12)   |
| 2016 | Amazon | 28 (27 - 28) | AMAZONAS      | 29 (27 - 30) | LUYA                    | 161   | 0            |
| 2016 | Amazon | 28 (27 - 28) | AMAZONAS      | 29 (27 - 30) | RODRIGUEZ DE MENDOZA    | 154   | 0            |
| 2016 | Amazon | 28 (27 - 28) | AMAZONAS      | 29 (27 - 30) | UTCUBAMBA               | 1306  | 25 (23 - 28) |
| 2016 | Amazon | 28 (27 - 28) | LORETO        | 25 (24 - 26) | ALTO AMAZONAS           | 2470  | 23 (22 - 25) |
| 2016 | Amazon | 28 (27 - 28) | LORETO        | 25 (24 - 26) | DATEM DEL MARAÑON       | 361   | 0            |
| 2016 | Amazon | 28 (27 - 28) | LORETO        | 25 (24 - 26) | LORETO                  | 484   | 0            |
| 2016 | Amazon | 28 (27 - 28) | LORETO        | 25 (24 - 26) | MARISCAL RAMON CASTILLA | 494   | 0            |
| 2016 | Amazon | 28 (27 - 28) | LORETO        | 25 (24 - 26) | MAYNAS                  | 10250 | 31 (30 - 32) |
| 2016 | Amazon | 28 (27 - 28) | LORETO        | 25 (24 - 26) | REQUENA                 | 590   | 1 (0 - 1)    |
| 2016 | Amazon | 28 (27 - 28) | LORETO        | 25 (24 - 26) | UCAYALI                 | 428   | 5 (3 - 8)    |
| 2016 | Amazon | 28 (27 - 28) | MADRE DE DIOS | 27 (25 - 29) | MANU                    | 37    | 0            |
| 2016 | Amazon | 28 (27 - 28) | MADRE DE DIOS | 27 (25 - 29) | TAHUAMANU               | 110   | 12 (6 - 19)  |
| 2016 | Amazon | 28 (27 - 28) | MADRE DE DIOS | 27 (25 - 29) | TAMBOPATA               | 2882  | 28 (26 - 30) |
| 2016 | Amazon | 28 (27 - 28) | SAN MARTIN    | 30 (30 - 31) | BELLAVISTA              | 498   | 0            |
| 2016 | Amazon | 28 (27 - 28) | SAN MARTIN    | 30 (30 - 31) | EL DORADO               | 540   | 0            |
| 2016 | Amazon | 28 (27 - 28) | SAN MARTIN    | 30 (30 - 31) | HUALLAGA                | 201   | 0            |
| 2016 | Amazon | 28 (27 - 28) | SAN MARTIN    | 30 (30 - 31) | LAMAS                   | 749   | 0            |
| 2016 | Amazon | 28 (27 - 28) | SAN MARTIN    | 30 (30 - 31) | MARISCAL CACERES        | 938   | 29 (27 - 32) |
| 2016 | Amazon | 28 (27 - 28) | SAN MARTIN    | 30 (30 - 31) | MOYOBAMBA               | 2483  | 33 (31 - 35) |
| 2016 | Amazon | 28 (27 - 28) | SAN MARTIN    | 30 (30 - 31) | PICOTA                  | 332   | 0            |
| 2016 | Amazon | 28 (27 - 28) | SAN MARTIN    | 30 (30 - 31) | RIOJA                   | 2244  | 23 (21 - 25) |
| 2016 | Amazon | 28 (27 - 28) | SAN MARTIN    | 30 (30 - 31) | SAN MARTIN              | 4842  | 49 (48 - 51) |
| 2016 | Amazon | 28 (27 - 28) | SAN MARTIN    | 30 (30 - 31) | TOCACHE                 | 1186  | 23 (20 - 25) |
| 2016 | Amazon | 28 (27 - 28) | UCAYALI       | 27 (27 - 28) | ATALAYA                 | 598   | 5 (3 - 7)    |
| 2016 | Amazon | 28 (27 - 28) | UCAYALI       | 27 (27 - 28) | CORONEL PORTILLO        | 9751  | 31 (30 - 32) |
| 2016 | Amazon | 28 (27 - 28) | UCAYALI       | 27 (27 - 28) | PADRE ABAD              | 812   | 2 (2 - 4)    |
| 2016 | Coast  | 40 (39 - 40) | CALLAO        | 37 (36 - 37) | CALLAO                  | 16309 | 37 (36 - 37) |
| 2016 | Coast  | 40 (39 - 40) | ICA           | 39 (38 - 39) | CHINCHA                 | 3882  | 35 (33 - 36) |
| 2016 | Coast  | 40 (39 - 40) | ICA           | 39 (38 - 39) | ICA                     | 8070  | 43 (42 - 44) |

|      |       |              |             |              |                       |        |              |
|------|-------|--------------|-------------|--------------|-----------------------|--------|--------------|
| 2016 | Coast | 40 (39 - 40) | ICA         | 39 (38 - 39) | NAZCA                 | 945    | 29 (26 - 32) |
| 2016 | Coast | 40 (39 - 40) | ICA         | 39 (38 - 39) | PALPA                 | 122    | 0            |
| 2016 | Coast | 40 (39 - 40) | ICA         | 39 (38 - 39) | PISCO                 | 2922   | 38 (36 - 39) |
| 2016 | Coast | 40 (39 - 40) | LA LIBERTAD | 36 (35 - 37) | ASCOPE                | 1245   | 25 (23 - 27) |
| 2016 | Coast | 40 (39 - 40) | LA LIBERTAD | 36 (35 - 37) | BOLIVAR               | 45     | 0            |
| 2016 | Coast | 40 (39 - 40) | LA LIBERTAD | 36 (35 - 37) | CHEPEN                | 1310   | 45 (42 - 47) |
| 2016 | Coast | 40 (39 - 40) | LA LIBERTAD | 36 (35 - 37) | GRAN CHIMU            | 113    | 0            |
| 2016 | Coast | 40 (39 - 40) | LA LIBERTAD | 36 (35 - 37) | JULCAN                | 217    | 0            |
| 2016 | Coast | 40 (39 - 40) | LA LIBERTAD | 36 (35 - 37) | OTUZCO                | 581    | 33 (29 - 37) |
| 2016 | Coast | 40 (39 - 40) | LA LIBERTAD | 36 (35 - 37) | PACASMAYO             | 1150   | 39 (36 - 42) |
| 2016 | Coast | 40 (39 - 40) | LA LIBERTAD | 36 (35 - 37) | PATAZ                 | 480    | 0            |
| 2016 | Coast | 40 (39 - 40) | LA LIBERTAD | 36 (35 - 37) | SANCHEZ CARRION       | 1818   | 22 (20 - 24) |
| 2016 | Coast | 40 (39 - 40) | LA LIBERTAD | 36 (35 - 37) | SANTIAGO DE CHUCO     | 487    | 20 (17 - 24) |
| 2016 | Coast | 40 (39 - 40) | LA LIBERTAD | 36 (35 - 37) | TRUJILLO              | 15166  | 42 (42 - 43) |
| 2016 | Coast | 40 (39 - 40) | LA LIBERTAD | 36 (35 - 37) | VIRU                  | 923    | 0            |
| 2016 | Coast | 40 (39 - 40) | LAMBAYEQUE  | 33 (32 - 33) | CHICLAYO              | 13161  | 38 (37 - 38) |
| 2016 | Coast | 40 (39 - 40) | LAMBAYEQUE  | 33 (32 - 33) | FERREÑAFE             | 713    | 7 (5 - 9)    |
| 2016 | Coast | 40 (39 - 40) | LAMBAYEQUE  | 33 (32 - 33) | LAMBAYEQUE            | 4163   | 21 (20 - 22) |
| 2016 | Coast | 40 (39 - 40) | LIMA        | 42 (42 - 43) | BARRANCA              | 2224   | 40 (38 - 42) |
| 2016 | Coast | 40 (39 - 40) | LIMA        | 42 (42 - 43) | CAÑETE                | 4117   | 29 (28 - 31) |
| 2016 | Coast | 40 (39 - 40) | LIMA        | 42 (42 - 43) | HUARAL                | 2667   | 26 (24 - 27) |
| 2016 | Coast | 40 (39 - 40) | LIMA        | 42 (42 - 43) | HUAROCHIRI            | 241    | 5 (3 - 9)    |
| 2016 | Coast | 40 (39 - 40) | LIMA        | 42 (42 - 43) | HUAURA                | 3080   | 38 (36 - 39) |
| 2016 | Coast | 40 (39 - 40) | LIMA        | 42 (42 - 43) | LIMA                  | 138565 | 43 (43 - 43) |
| 2016 | Coast | 40 (39 - 40) | MOQUEGUA    | 40 (38 - 42) | GENERAL SANCHEZ CERRO | 42     | 0            |
| 2016 | Coast | 40 (39 - 40) | MOQUEGUA    | 40 (38 - 42) | ILO                   | 1086   | 42 (39 - 45) |
| 2016 | Coast | 40 (39 - 40) | MOQUEGUA    | 40 (38 - 42) | MARISCAL NIETO        | 1312   | 39 (36 - 42) |
| 2016 | Coast | 40 (39 - 40) | PIURA       | 32 (31 - 32) | AYABACA               | 691    | 0            |
| 2016 | Coast | 40 (39 - 40) | PIURA       | 32 (31 - 32) | HUANCABAMBA           | 733    | 3 (2 - 4)    |
| 2016 | Coast | 40 (39 - 40) | PIURA       | 32 (31 - 32) | MORROPON              | 2294   | 32 (30 - 34) |
| 2016 | Coast | 40 (39 - 40) | PIURA       | 32 (31 - 32) | PAITA                 | 1598   | 21 (19 - 23) |

|      |           |              |          |              |                           |       |              |
|------|-----------|--------------|----------|--------------|---------------------------|-------|--------------|
| 2016 | Coast     | 40 (39 - 40) | PIURA    | 32 (31 - 32) | PIURA                     | 10804 | 35 (34 - 36) |
| 2016 | Coast     | 40 (39 - 40) | PIURA    | 32 (31 - 32) | SECHURA                   | 899   | 8 (6 - 10)   |
| 2016 | Coast     | 40 (39 - 40) | PIURA    | 32 (31 - 32) | SULLANA                   | 4770  | 42 (41 - 44) |
| 2016 | Coast     | 40 (39 - 40) | PIURA    | 32 (31 - 32) | TALARA                    | 753   | 18 (16 - 21) |
| 2016 | Coast     | 40 (39 - 40) | TACNA    | 45 (44 - 46) | TACNA                     | 5018  | 45 (44 - 47) |
| 2016 | Coast     | 40 (39 - 40) | TUMBES   | 47 (46 - 49) | CONTRALMIRANTE VILLAR     | 111   | 0            |
| 2016 | Coast     | 40 (39 - 40) | TUMBES   | 47 (46 - 49) | TUMBES                    | 3792  | 52 (51 - 54) |
| 2016 | Coast     | 40 (39 - 40) | TUMBES   | 47 (46 - 49) | ZARUMILLA                 | 290   | 0            |
| 2016 | Highlands | 28 (28 - 28) | ANCASH   | 33 (32 - 34) | ANTONIO RAIMONDI          | 58    | 0            |
| 2016 | Highlands | 28 (28 - 28) | ANCASH   | 33 (32 - 34) | ASUNCION                  | 45    | 0            |
| 2016 | Highlands | 28 (28 - 28) | ANCASH   | 33 (32 - 34) | CARHUAZ                   | 506   | 0            |
| 2016 | Highlands | 28 (28 - 28) | ANCASH   | 33 (32 - 34) | CARLOS FERMIN FITZCARRALD | 120   | 0            |
| 2016 | Highlands | 28 (28 - 28) | ANCASH   | 33 (32 - 34) | HUARAZ                    | 4194  | 35 (34 - 37) |
| 2016 | Highlands | 28 (28 - 28) | ANCASH   | 33 (32 - 34) | HUARI                     | 553   | 23 (20 - 27) |
| 2016 | Highlands | 28 (28 - 28) | ANCASH   | 33 (32 - 34) | HUAYLAS                   | 827   | 26 (23 - 29) |
| 2016 | Highlands | 28 (28 - 28) | ANCASH   | 33 (32 - 34) | MARISCAL LUZURIAGA        | 74    | 0            |
| 2016 | Highlands | 28 (28 - 28) | ANCASH   | 33 (32 - 34) | POMABAMBA                 | 379   | 20 (16 - 24) |
| 2016 | Highlands | 28 (28 - 28) | ANCASH   | 33 (32 - 34) | RECUAY                    | 168   | 20 (14 - 26) |
| 2016 | Highlands | 28 (28 - 28) | ANCASH   | 33 (32 - 34) | SANTA                     | 6427  | 43 (41 - 44) |
| 2016 | Highlands | 28 (28 - 28) | ANCASH   | 33 (32 - 34) | SIHUAS                    | 253   | 1 (0 - 3)    |
| 2016 | Highlands | 28 (28 - 28) | ANCASH   | 33 (32 - 34) | YUNGAY                    | 473   | 0            |
| 2016 | Highlands | 28 (28 - 28) | APURIMAC | 26 (25 - 27) | ABANCAY                   | 2656  | 39 (37 - 41) |
| 2016 | Highlands | 28 (28 - 28) | APURIMAC | 26 (25 - 27) | ANDAHUAYLAS               | 2984  | 24 (23 - 26) |
| 2016 | Highlands | 28 (28 - 28) | APURIMAC | 26 (25 - 27) | ANTABAMBA                 | 42    | 0            |
| 2016 | Highlands | 28 (28 - 28) | APURIMAC | 26 (25 - 27) | AYMARAE                   | 122   | 0            |
| 2016 | Highlands | 28 (28 - 28) | APURIMAC | 26 (25 - 27) | CHINCHEROS                | 647   | 10 (8 - 13)  |
| 2016 | Highlands | 28 (28 - 28) | APURIMAC | 26 (25 - 27) | COTABAMBAS                | 795   | 10 (8 - 12)  |
| 2016 | Highlands | 28 (28 - 28) | APURIMAC | 26 (25 - 27) | GRAU                      | 130   | 0            |
| 2016 | Highlands | 28 (28 - 28) | AREQUIPA | 43 (42 - 43) | AREQUIPA                  | 19705 | 46 (45 - 46) |
| 2016 | Highlands | 28 (28 - 28) | AREQUIPA | 43 (42 - 43) | CAMANA                    | 1070  | 38 (35 - 41) |
| 2016 | Highlands | 28 (28 - 28) | AREQUIPA | 43 (42 - 43) | CARAVELI                  | 152   | 0            |

---

|      |           |              |           |              |                      |      |              |
|------|-----------|--------------|-----------|--------------|----------------------|------|--------------|
| 2016 | Highlands | 28 (28 - 28) | AREQUIPA  | 43 (42 - 43) | CASTILLA             | 445  | 23 (19 - 27) |
| 2016 | Highlands | 28 (28 - 28) | AREQUIPA  | 43 (42 - 43) | CAYLLOMA             | 1228 | 18 (16 - 20) |
| 2016 | Highlands | 28 (28 - 28) | AREQUIPA  | 43 (42 - 43) | CONDESUYOS           | 65   | 0            |
| 2016 | Highlands | 28 (28 - 28) | AREQUIPA  | 43 (42 - 43) | ISLAY                | 422  | 36 (31 - 41) |
| 2016 | Highlands | 28 (28 - 28) | AYACUCHO  | 25 (24 - 26) | CANGALLO             | 493  | 28 (24 - 32) |
| 2016 | Highlands | 28 (28 - 28) | AYACUCHO  | 25 (24 - 26) | HUAMANGA             | 6793 | 32 (31 - 33) |
| 2016 | Highlands | 28 (28 - 28) | AYACUCHO  | 25 (24 - 26) | HUANCA SANCOS        | 65   | 0            |
| 2016 | Highlands | 28 (28 - 28) | AYACUCHO  | 25 (24 - 26) | HUANTA               | 1581 | 16 (14 - 18) |
| 2016 | Highlands | 28 (28 - 28) | AYACUCHO  | 25 (24 - 26) | LA MAR               | 1509 | 11 (9 - 13)  |
| 2016 | Highlands | 28 (28 - 28) | AYACUCHO  | 25 (24 - 26) | LUCANAS              | 501  | 16 (13 - 20) |
| 2016 | Highlands | 28 (28 - 28) | AYACUCHO  | 25 (24 - 26) | PARINACOCHAS         | 418  | 22 (18 - 26) |
| 2016 | Highlands | 28 (28 - 28) | AYACUCHO  | 25 (24 - 26) | PAUCAR DEL SARA SARA | 59   | 0            |
| 2016 | Highlands | 28 (28 - 28) | AYACUCHO  | 25 (24 - 26) | SUCRE                | 52   | 0            |
| 2016 | Highlands | 28 (28 - 28) | AYACUCHO  | 25 (24 - 26) | VICTOR FAJARDO       | 59   | 0            |
| 2016 | Highlands | 28 (28 - 28) | AYACUCHO  | 25 (24 - 26) | VILCAS HUAMAN        | 146  | 0            |
| 2016 | Highlands | 28 (28 - 28) | CAJAMARCA | 23 (22 - 23) | CAJABAMBA            | 886  | 19 (16 - 21) |
| 2016 | Highlands | 28 (28 - 28) | CAJAMARCA | 23 (22 - 23) | CAJAMARCA            | 7119 | 23 (22 - 24) |
| 2016 | Highlands | 28 (28 - 28) | CAJAMARCA | 23 (22 - 23) | CELENDIN             | 548  | 0            |
| 2016 | Highlands | 28 (28 - 28) | CAJAMARCA | 23 (22 - 23) | CHOTA                | 1782 | 29 (27 - 31) |
| 2016 | Highlands | 28 (28 - 28) | CAJAMARCA | 23 (22 - 23) | CONTUMAZA            | 159  | 0            |
| 2016 | Highlands | 28 (28 - 28) | CAJAMARCA | 23 (22 - 23) | CUTERVO              | 1093 | 27 (24 - 29) |
| 2016 | Highlands | 28 (28 - 28) | CAJAMARCA | 23 (22 - 23) | HUALGAYOC            | 753  | 10 (8 - 13)  |
| 2016 | Highlands | 28 (28 - 28) | CAJAMARCA | 23 (22 - 23) | JAEN                 | 3013 | 38 (36 - 40) |
| 2016 | Highlands | 28 (28 - 28) | CAJAMARCA | 23 (22 - 23) | SAN IGNACIO          | 824  | 0            |
| 2016 | Highlands | 28 (28 - 28) | CAJAMARCA | 23 (22 - 23) | SAN MARCOS           | 343  | 0            |
| 2016 | Highlands | 28 (28 - 28) | CAJAMARCA | 23 (22 - 23) | SAN MIGUEL           | 188  | 0            |
| 2016 | Highlands | 28 (28 - 28) | CAJAMARCA | 23 (22 - 23) | SAN PABLO            | 141  | 0            |
| 2016 | Highlands | 28 (28 - 28) | CAJAMARCA | 23 (22 - 23) | SANTA CRUZ           | 181  | 4 (2 - 8)    |
| 2016 | Highlands | 28 (28 - 28) | CUSCO     | 31 (31 - 32) | ANTA                 | 276  | 0            |
| 2016 | Highlands | 28 (28 - 28) | CUSCO     | 31 (31 - 32) | CALCA                | 561  | 0            |
| 2016 | Highlands | 28 (28 - 28) | CUSCO     | 31 (31 - 32) | CANAS                | 142  | 0            |

---

|      |           |              |             |              |                |       |              |
|------|-----------|--------------|-------------|--------------|----------------|-------|--------------|
| 2016 | Highlands | 28 (28 - 28) | CUSCO       | 31 (31 - 32) | CANCHIS        | 1796  | 23 (21 - 25) |
| 2016 | Highlands | 28 (28 - 28) | CUSCO       | 31 (31 - 32) | CHUMBIVILCAS   | 613   | 17 (14 - 20) |
| 2016 | Highlands | 28 (28 - 28) | CUSCO       | 31 (31 - 32) | CUSCO          | 12165 | 42 (41 - 43) |
| 2016 | Highlands | 28 (28 - 28) | CUSCO       | 31 (31 - 32) | ESPINAR        | 967   | 12 (10 - 14) |
| 2016 | Highlands | 28 (28 - 28) | CUSCO       | 31 (31 - 32) | LA CONVENCION  | 2204  | 25 (23 - 27) |
| 2016 | Highlands | 28 (28 - 28) | CUSCO       | 31 (31 - 32) | PARURO         | 30    | 0            |
| 2016 | Highlands | 28 (28 - 28) | CUSCO       | 31 (31 - 32) | PAUCARTAMBO    | 256   | 0            |
| 2016 | Highlands | 28 (28 - 28) | CUSCO       | 31 (31 - 32) | QUISPICANCHI   | 554   | 0            |
| 2016 | Highlands | 28 (28 - 28) | CUSCO       | 31 (31 - 32) | URUBAMBA       | 398   | 0            |
| 2016 | Highlands | 28 (28 - 28) | HUANCVELICA | 18 (17 - 20) | ACOBAMBA       | 646   | 14 (11 - 17) |
| 2016 | Highlands | 28 (28 - 28) | HUANCVELICA | 18 (17 - 20) | ANGARAES       | 703   | 14 (11 - 16) |
| 2016 | Highlands | 28 (28 - 28) | HUANCVELICA | 18 (17 - 20) | CASTROVIRREYNA | 74    | 0            |
| 2016 | Highlands | 28 (28 - 28) | HUANCVELICA | 18 (17 - 20) | CHURCAMP       | 405   | 0            |
| 2016 | Highlands | 28 (28 - 28) | HUANCVELICA | 18 (17 - 20) | HUANCVELICA    | 2225  | 26 (24 - 28) |
| 2016 | Highlands | 28 (28 - 28) | HUANCVELICA | 18 (17 - 20) | HUAYTARA       | 106   | 0            |
| 2016 | Highlands | 28 (28 - 28) | HUANCVELICA | 18 (17 - 20) | TAYACAJA       | 880   | 19 (17 - 22) |
| 2016 | Highlands | 28 (28 - 28) | HUANUCO     | 20 (19 - 21) | AMBO           | 597   | 0            |
| 2016 | Highlands | 28 (28 - 28) | HUANUCO     | 20 (19 - 21) | DOS DE MAYO    | 433   | 8 (5 - 11)   |
| 2016 | Highlands | 28 (28 - 28) | HUANUCO     | 20 (19 - 21) | HUACAYBAMBA    | 124   | 0            |
| 2016 | Highlands | 28 (28 - 28) | HUANUCO     | 20 (19 - 21) | HUAMALIES      | 679   | 6 (5 - 9)    |
| 2016 | Highlands | 28 (28 - 28) | HUANUCO     | 20 (19 - 21) | HUANUCO        | 6413  | 26 (24 - 27) |
| 2016 | Highlands | 28 (28 - 28) | HUANUCO     | 20 (19 - 21) | LAURICOCHA     | 197   | 0            |
| 2016 | Highlands | 28 (28 - 28) | HUANUCO     | 20 (19 - 21) | LEONCIO PRADO  | 3044  | 30 (28 - 31) |
| 2016 | Highlands | 28 (28 - 28) | HUANUCO     | 20 (19 - 21) | MARAÑON        | 83    | 0            |
| 2016 | Highlands | 28 (28 - 28) | HUANUCO     | 20 (19 - 21) | PACHITEA       | 850   | 0            |
| 2016 | Highlands | 28 (28 - 28) | HUANUCO     | 20 (19 - 21) | PUERTO INCA    | 329   | 0            |
| 2016 | Highlands | 28 (28 - 28) | HUANUCO     | 20 (19 - 21) | YAROWILCA      | 284   | 0            |
| 2016 | Highlands | 28 (28 - 28) | JUNIN       | 27 (26 - 27) | CHANCHAMAYO    | 2732  | 37 (36 - 39) |
| 2016 | Highlands | 28 (28 - 28) | JUNIN       | 27 (26 - 27) | CHUPACA        | 497   | 0            |
| 2016 | Highlands | 28 (28 - 28) | JUNIN       | 27 (26 - 27) | CONCEPCION     | 356   | 0            |
| 2016 | Highlands | 28 (28 - 28) | JUNIN       | 27 (26 - 27) | HUANCAYO       | 9953  | 30 (29 - 31) |

|      |           |              |          |              |                        |      |              |
|------|-----------|--------------|----------|--------------|------------------------|------|--------------|
| 2016 | Highlands | 28 (28 - 28) | JUNIN    | 27 (26 - 27) | JAUJA                  | 1066 | 26 (23 - 29) |
| 2016 | Highlands | 28 (28 - 28) | JUNIN    | 27 (26 - 27) | JUNIN                  | 408  | 12 (9 - 15)  |
| 2016 | Highlands | 28 (28 - 28) | JUNIN    | 27 (26 - 27) | SATIPO                 | 2363 | 20 (19 - 22) |
| 2016 | Highlands | 28 (28 - 28) | JUNIN    | 27 (26 - 27) | TARMA                  | 1443 | 11 (10 - 13) |
| 2016 | Highlands | 28 (28 - 28) | JUNIN    | 27 (26 - 27) | YAULI                  | 406  | 29 (24 - 33) |
| 2016 | Highlands | 28 (28 - 28) | PASCO    | 20 (19 - 21) | DANIEL ALCIDES CARRION | 176  | 1 (0 - 3)    |
| 2016 | Highlands | 28 (28 - 28) | PASCO    | 20 (19 - 21) | OXAPAMPA               | 1696 | 13 (12 - 15) |
| 2016 | Highlands | 28 (28 - 28) | PASCO    | 20 (19 - 21) | PASCO                  | 2442 | 25 (24 - 27) |
| 2016 | Highlands | 28 (28 - 28) | PUNO     | 22 (22 - 23) | AZANGARO               | 1214 | 9 (7 - 10)   |
| 2016 | Highlands | 28 (28 - 28) | PUNO     | 22 (22 - 23) | CARABAYA               | 460  | 8 (6 - 11)   |
| 2016 | Highlands | 28 (28 - 28) | PUNO     | 22 (22 - 23) | CHUCUITO               | 841  | 5 (3 - 6)    |
| 2016 | Highlands | 28 (28 - 28) | PUNO     | 22 (22 - 23) | EL COLLAO              | 751  | 6 (5 - 8)    |
| 2016 | Highlands | 28 (28 - 28) | PUNO     | 22 (22 - 23) | HUANCANE               | 594  | 13 (11 - 16) |
| 2016 | Highlands | 28 (28 - 28) | PUNO     | 22 (22 - 23) | LAMPA                  | 262  | 6 (4 - 10)   |
| 2016 | Highlands | 28 (28 - 28) | PUNO     | 22 (22 - 23) | MELGAR                 | 910  | 20 (17 - 22) |
| 2016 | Highlands | 28 (28 - 28) | PUNO     | 22 (22 - 23) | MOHO                   | 80   | 0            |
| 2016 | Highlands | 28 (28 - 28) | PUNO     | 22 (22 - 23) | PUNO                   | 3377 | 33 (31 - 34) |
| 2016 | Highlands | 28 (28 - 28) | PUNO     | 22 (22 - 23) | SAN ANTONIO DE PUTINA  | 80   | 0            |
| 2016 | Highlands | 28 (28 - 28) | PUNO     | 22 (22 - 23) | SAN ROMAN              | 5930 | 28 (27 - 30) |
| 2016 | Highlands | 28 (28 - 28) | PUNO     | 22 (22 - 23) | SANDIA                 | 393  | 9 (7 - 13)   |
| 2016 | Highlands | 28 (28 - 28) | PUNO     | 22 (22 - 23) | YUNGUYO                | 383  | 14 (11 - 18) |
| 2017 | Amazon    | 27 (27 - 28) | AMAZONAS | 29 (28 - 30) | BAGUA                  | 1279 | 45 (43 - 48) |
| 2017 | Amazon    | 27 (27 - 28) | AMAZONAS | 29 (28 - 30) | BONGARA                | 204  | 0            |
| 2017 | Amazon    | 27 (27 - 28) | AMAZONAS | 29 (28 - 30) | CHACHAPOYAS            | 1750 | 33 (31 - 35) |
| 2017 | Amazon    | 27 (27 - 28) | AMAZONAS | 29 (28 - 30) | CONDORCANQUI           | 454  | 4 (2 - 6)    |
| 2017 | Amazon    | 27 (27 - 28) | AMAZONAS | 29 (28 - 30) | LUYA                   | 168  | 0            |
| 2017 | Amazon    | 27 (27 - 28) | AMAZONAS | 29 (28 - 30) | RODRIGUEZ DE MENDOZA   | 166  | 0            |
| 2017 | Amazon    | 27 (27 - 28) | AMAZONAS | 29 (28 - 30) | UTCUBAMBA              | 1430 | 28 (25 - 30) |
| 2017 | Amazon    | 27 (27 - 28) | LORETO   | 25 (25 - 26) | ALTO AMAZONAS          | 3411 | 21 (20 - 23) |
| 2017 | Amazon    | 27 (27 - 28) | LORETO   | 25 (25 - 26) | DATEM DEL MARAÑON      | 485  | 0            |
| 2017 | Amazon    | 27 (27 - 28) | LORETO   | 25 (25 - 26) | LORETO                 | 669  | 0            |



|      |        |              |               |              |                         |       |              |
|------|--------|--------------|---------------|--------------|-------------------------|-------|--------------|
| 2017 | Amazon | 27 (27 - 28) | LORETO        | 25 (25 - 26) | MARISCAL RAMON CASTILLA | 861   | 2 (1 - 3)    |
| 2017 | Amazon | 27 (27 - 28) | LORETO        | 25 (25 - 26) | MAYNAS                  | 10870 | 34 (34 - 35) |
| 2017 | Amazon | 27 (27 - 28) | LORETO        | 25 (25 - 26) | PUTUMAYO                | 56    | 0            |
| 2017 | Amazon | 27 (27 - 28) | LORETO        | 25 (25 - 26) | REQUENA                 | 695   | 0            |
| 2017 | Amazon | 27 (27 - 28) | LORETO        | 25 (25 - 26) | UCAYALI                 | 845   | 6 (5 - 8)    |
| 2017 | Amazon | 27 (27 - 28) | MADRE DE DIOS | 25 (24 - 27) | MANU                    | 123   | 0            |
| 2017 | Amazon | 27 (27 - 28) | MADRE DE DIOS | 25 (24 - 27) | TAHUAMANU               | 131   | 11 (6 - 17)  |
| 2017 | Amazon | 27 (27 - 28) | MADRE DE DIOS | 25 (24 - 27) | TAMBOPATA               | 3414  | 27 (25 - 28) |
| 2017 | Amazon | 27 (27 - 28) | SAN MARTIN    | 30 (29 - 31) | BELLAVISTA              | 600   | 0            |
| 2017 | Amazon | 27 (27 - 28) | SAN MARTIN    | 30 (29 - 31) | EL DORADO               | 489   | 0            |
| 2017 | Amazon | 27 (27 - 28) | SAN MARTIN    | 30 (29 - 31) | HUALLAGA                | 161   | 0            |
| 2017 | Amazon | 27 (27 - 28) | SAN MARTIN    | 30 (29 - 31) | LAMAS                   | 836   | 0            |
| 2017 | Amazon | 27 (27 - 28) | SAN MARTIN    | 30 (29 - 31) | MARISCAL CACERES        | 1007  | 24 (22 - 27) |
| 2017 | Amazon | 27 (27 - 28) | SAN MARTIN    | 30 (29 - 31) | MOYOBAMBA               | 2413  | 33 (31 - 35) |
| 2017 | Amazon | 27 (27 - 28) | SAN MARTIN    | 30 (29 - 31) | PICOTA                  | 462   | 0            |
| 2017 | Amazon | 27 (27 - 28) | SAN MARTIN    | 30 (29 - 31) | RIOJA                   | 2457  | 27 (25 - 29) |
| 2017 | Amazon | 27 (27 - 28) | SAN MARTIN    | 30 (29 - 31) | SAN MARTIN              | 5425  | 47 (46 - 48) |
| 2017 | Amazon | 27 (27 - 28) | SAN MARTIN    | 30 (29 - 31) | TOCACHE                 | 1385  | 21 (19 - 24) |
| 2017 | Amazon | 27 (27 - 28) | UCAYALI       | 27 (26 - 28) | ATALAYA                 | 711   | 4 (3 - 6)    |
| 2017 | Amazon | 27 (27 - 28) | UCAYALI       | 27 (26 - 28) | CORONEL PORTILLO        | 10585 | 31 (30 - 32) |
| 2017 | Amazon | 27 (27 - 28) | UCAYALI       | 27 (26 - 28) | PADRE ABAD              | 904   | 0            |
| 2017 | Amazon | 27 (27 - 28) | UCAYALI       | 27 (26 - 28) | PURUS                   | 63    | 0            |
| 2017 | Coast  | 41 (40 - 41) | CALLAO        | 39 (38 - 39) | CALLAO                  | 18553 | 39 (38 - 39) |
| 2017 | Coast  | 41 (40 - 41) | ICA           | 41 (41 - 42) | CHINCHA                 | 3926  | 38 (36 - 39) |
| 2017 | Coast  | 41 (40 - 41) | ICA           | 41 (41 - 42) | ICA                     | 7862  | 45 (44 - 47) |
| 2017 | Coast  | 41 (40 - 41) | ICA           | 41 (41 - 42) | NAZCA                   | 1175  | 33 (31 - 36) |
| 2017 | Coast  | 41 (40 - 41) | ICA           | 41 (41 - 42) | PALPA                   | 75    | 1 (0 - 7)    |
| 2017 | Coast  | 41 (40 - 41) | ICA           | 41 (41 - 42) | PISCO                   | 2996  | 40 (38 - 42) |
| 2017 | Coast  | 41 (40 - 41) | LA LIBERTAD   | 36 (35 - 36) | ASCOPE                  | 1160  | 28 (25 - 30) |
| 2017 | Coast  | 41 (40 - 41) | LA LIBERTAD   | 36 (35 - 36) | BOLIVAR                 | 35    | 0            |
| 2017 | Coast  | 41 (40 - 41) | LA LIBERTAD   | 36 (35 - 36) | CHEPEN                  | 1212  | 49 (46 - 52) |

|      |       |              |             |              |                       |        |              |
|------|-------|--------------|-------------|--------------|-----------------------|--------|--------------|
| 2017 | Coast | 41 (40 - 41) | LA LIBERTAD | 36 (35 - 36) | GRAN CHIMU            | 94     | 0            |
| 2017 | Coast | 41 (40 - 41) | LA LIBERTAD | 36 (35 - 36) | JULCAN                | 246    | 0            |
| 2017 | Coast | 41 (40 - 41) | LA LIBERTAD | 36 (35 - 36) | OTUZCO                | 578    | 28 (24 - 32) |
| 2017 | Coast | 41 (40 - 41) | LA LIBERTAD | 36 (35 - 36) | PACASMAYO             | 1065   | 40 (37 - 43) |
| 2017 | Coast | 41 (40 - 41) | LA LIBERTAD | 36 (35 - 36) | PATAZ                 | 681    | 0            |
| 2017 | Coast | 41 (40 - 41) | LA LIBERTAD | 36 (35 - 36) | SANCHEZ CARRION       | 2142   | 17 (16 - 19) |
| 2017 | Coast | 41 (40 - 41) | LA LIBERTAD | 36 (35 - 36) | SANTIAGO DE CHUCO     | 554    | 20 (17 - 23) |
| 2017 | Coast | 41 (40 - 41) | LA LIBERTAD | 36 (35 - 36) | TRUJILLO              | 15801  | 43 (42 - 44) |
| 2017 | Coast | 41 (40 - 41) | LA LIBERTAD | 36 (35 - 36) | VIRU                  | 922    | 0            |
| 2017 | Coast | 41 (40 - 41) | LAMBAYEQUE  | 33 (32 - 33) | CHICLAYO              | 13702  | 37 (37 - 38) |
| 2017 | Coast | 41 (40 - 41) | LAMBAYEQUE  | 33 (32 - 33) | FERREÑAFE             | 799    | 4 (3 - 6)    |
| 2017 | Coast | 41 (40 - 41) | LAMBAYEQUE  | 33 (32 - 33) | LAMBAYEQUE            | 4645   | 23 (22 - 25) |
| 2017 | Coast | 41 (40 - 41) | LIMA        | 43 (43 - 44) | BARRANCA              | 2224   | 37 (35 - 39) |
| 2017 | Coast | 41 (40 - 41) | LIMA        | 43 (43 - 44) | CAÑETE                | 4258   | 32 (31 - 34) |
| 2017 | Coast | 41 (40 - 41) | LIMA        | 43 (43 - 44) | HUARAL                | 2704   | 30 (28 - 32) |
| 2017 | Coast | 41 (40 - 41) | LIMA        | 43 (43 - 44) | HUAROCHIRI            | 201    | 0            |
| 2017 | Coast | 41 (40 - 41) | LIMA        | 43 (43 - 44) | HUAURA                | 3498   | 38 (36 - 40) |
| 2017 | Coast | 41 (40 - 41) | LIMA        | 43 (43 - 44) | LIMA                  | 140026 | 44 (44 - 44) |
| 2017 | Coast | 41 (40 - 41) | MOQUEGUA    | 42 (40 - 44) | ILO                   | 1078   | 40 (37 - 43) |
| 2017 | Coast | 41 (40 - 41) | MOQUEGUA    | 42 (40 - 44) | MARISCAL NIETO        | 1320   | 45 (42 - 48) |
| 2017 | Coast | 41 (40 - 41) | PIURA       | 34 (33 - 34) | AYABACA               | 816    | 0            |
| 2017 | Coast | 41 (40 - 41) | PIURA       | 34 (33 - 34) | HUANCABAMBA           | 732    | 3 (2 - 5)    |
| 2017 | Coast | 41 (40 - 41) | PIURA       | 34 (33 - 34) | MORROPON              | 2326   | 35 (33 - 37) |
| 2017 | Coast | 41 (40 - 41) | PIURA       | 34 (33 - 34) | PAITA                 | 1775   | 28 (25 - 30) |
| 2017 | Coast | 41 (40 - 41) | PIURA       | 34 (33 - 34) | PIURA                 | 11254  | 37 (36 - 37) |
| 2017 | Coast | 41 (40 - 41) | PIURA       | 34 (33 - 34) | SECHURA               | 632    | 1 (1 - 2)    |
| 2017 | Coast | 41 (40 - 41) | PIURA       | 34 (33 - 34) | SULLANA               | 5718   | 44 (43 - 46) |
| 2017 | Coast | 41 (40 - 41) | PIURA       | 34 (33 - 34) | TALARA                | 703    | 13 (11 - 16) |
| 2017 | Coast | 41 (40 - 41) | TACNA       | 47 (45 - 48) | TACNA                 | 5084   | 47 (46 - 48) |
| 2017 | Coast | 41 (40 - 41) | TUMBES      | 45 (44 - 47) | CONTRALMIRANTE VILLAR | 105    | 0            |
| 2017 | Coast | 41 (40 - 41) | TUMBES      | 45 (44 - 47) | TUMBES                | 3784   | 50 (49 - 52) |

|      |           |              |          |              |                           |       |              |
|------|-----------|--------------|----------|--------------|---------------------------|-------|--------------|
| 2017 | Coast     | 41 (40 - 41) | TUMBES   | 45 (44 - 47) | ZARUMILLA                 | 304   | 0            |
| 2017 | Highlands | 29 (29 - 29) | ANCASH   | 31 (30 - 32) | ANTONIO RAIMONDI          | 78    | 0            |
| 2017 | Highlands | 29 (29 - 29) | ANCASH   | 31 (30 - 32) | ASUNCION                  | 146   | 0            |
| 2017 | Highlands | 29 (29 - 29) | ANCASH   | 31 (30 - 32) | BOLOGNESI                 | 35    | 0            |
| 2017 | Highlands | 29 (29 - 29) | ANCASH   | 31 (30 - 32) | CARHUAZ                   | 520   | 9 (6 - 11)   |
| 2017 | Highlands | 29 (29 - 29) | ANCASH   | 31 (30 - 32) | CARLOS FERMIN FITZCARRALD | 142   | 0            |
| 2017 | Highlands | 29 (29 - 29) | ANCASH   | 31 (30 - 32) | CASMA                     | 235   | 12 (8 - 17)  |
| 2017 | Highlands | 29 (29 - 29) | ANCASH   | 31 (30 - 32) | HUARAZ                    | 4206  | 36 (35 - 38) |
| 2017 | Highlands | 29 (29 - 29) | ANCASH   | 31 (30 - 32) | HUARI                     | 572   | 22 (19 - 26) |
| 2017 | Highlands | 29 (29 - 29) | ANCASH   | 31 (30 - 32) | HUAYLAS                   | 868   | 34 (31 - 38) |
| 2017 | Highlands | 29 (29 - 29) | ANCASH   | 31 (30 - 32) | MARISCAL LUZURIAGA        | 82    | 0            |
| 2017 | Highlands | 29 (29 - 29) | ANCASH   | 31 (30 - 32) | PALLASCA                  | 88    | 0            |
| 2017 | Highlands | 29 (29 - 29) | ANCASH   | 31 (30 - 32) | POMABAMBA                 | 390   | 14 (11 - 18) |
| 2017 | Highlands | 29 (29 - 29) | ANCASH   | 31 (30 - 32) | RECUAY                    | 145   | 19 (13 - 27) |
| 2017 | Highlands | 29 (29 - 29) | ANCASH   | 31 (30 - 32) | SANTA                     | 7686  | 37 (36 - 38) |
| 2017 | Highlands | 29 (29 - 29) | ANCASH   | 31 (30 - 32) | SIHUAS                    | 245   | 0            |
| 2017 | Highlands | 29 (29 - 29) | ANCASH   | 31 (30 - 32) | YUNGAY                    | 486   | 0            |
| 2017 | Highlands | 29 (29 - 29) | APURIMAC | 26 (25 - 27) | ABANCAY                   | 2720  | 38 (36 - 39) |
| 2017 | Highlands | 29 (29 - 29) | APURIMAC | 26 (25 - 27) | ANDAHUAYLAS               | 2953  | 25 (23 - 27) |
| 2017 | Highlands | 29 (29 - 29) | APURIMAC | 26 (25 - 27) | ANTABAMBA                 | 60    | 0            |
| 2017 | Highlands | 29 (29 - 29) | APURIMAC | 26 (25 - 27) | AYMARAES                  | 135   | 0            |
| 2017 | Highlands | 29 (29 - 29) | APURIMAC | 26 (25 - 27) | CHINCHEROS                | 635   | 14 (11 - 17) |
| 2017 | Highlands | 29 (29 - 29) | APURIMAC | 26 (25 - 27) | COTABAMBAS                | 749   | 13 (11 - 16) |
| 2017 | Highlands | 29 (29 - 29) | APURIMAC | 26 (25 - 27) | GRAU                      | 123   | 0            |
| 2017 | Highlands | 29 (29 - 29) | AREQUIPA | 43 (42 - 44) | AREQUIPA                  | 19241 | 46 (46 - 47) |
| 2017 | Highlands | 29 (29 - 29) | AREQUIPA | 43 (42 - 44) | CAMANA                    | 1070  | 37 (34 - 40) |
| 2017 | Highlands | 29 (29 - 29) | AREQUIPA | 43 (42 - 44) | CARAVELI                  | 130   | 0            |
| 2017 | Highlands | 29 (29 - 29) | AREQUIPA | 43 (42 - 44) | CASTILLA                  | 418   | 28 (24 - 33) |
| 2017 | Highlands | 29 (29 - 29) | AREQUIPA | 43 (42 - 44) | CAYLLOMA                  | 1380  | 19 (17 - 21) |
| 2017 | Highlands | 29 (29 - 29) | AREQUIPA | 43 (42 - 44) | CONDESUYOS                | 75    | 0            |
| 2017 | Highlands | 29 (29 - 29) | AREQUIPA | 43 (42 - 44) | ISLAY                     | 425   | 31 (26 - 35) |

|      |           |              |           |              |                      |       |              |
|------|-----------|--------------|-----------|--------------|----------------------|-------|--------------|
| 2017 | Highlands | 29 (29 - 29) | AREQUIPA  | 43 (42 - 44) | LA UNION             | 35    | 0            |
| 2017 | Highlands | 29 (29 - 29) | AYACUCHO  | 27 (26 - 28) | CANGALLO             | 509   | 23 (20 - 27) |
| 2017 | Highlands | 29 (29 - 29) | AYACUCHO  | 27 (26 - 28) | HUAMANGA             | 7091  | 33 (32 - 34) |
| 2017 | Highlands | 29 (29 - 29) | AYACUCHO  | 27 (26 - 28) | HUANCA SANCOS        | 53    | 0            |
| 2017 | Highlands | 29 (29 - 29) | AYACUCHO  | 27 (26 - 28) | HUANTA               | 1671  | 20 (18 - 22) |
| 2017 | Highlands | 29 (29 - 29) | AYACUCHO  | 27 (26 - 28) | LA MAR               | 1838  | 22 (21 - 24) |
| 2017 | Highlands | 29 (29 - 29) | AYACUCHO  | 27 (26 - 28) | LUCANAS              | 476   | 14 (11 - 18) |
| 2017 | Highlands | 29 (29 - 29) | AYACUCHO  | 27 (26 - 28) | PARINACOCHAS         | 395   | 21 (17 - 26) |
| 2017 | Highlands | 29 (29 - 29) | AYACUCHO  | 27 (26 - 28) | PAUCAR DEL SARA SARA | 61    | 0            |
| 2017 | Highlands | 29 (29 - 29) | AYACUCHO  | 27 (26 - 28) | SUCRE                | 73    | 0            |
| 2017 | Highlands | 29 (29 - 29) | AYACUCHO  | 27 (26 - 28) | VICTOR FAJARDO       | 53    | 0            |
| 2017 | Highlands | 29 (29 - 29) | AYACUCHO  | 27 (26 - 28) | VILCAS HUAMAN        | 124   | 0            |
| 2017 | Highlands | 29 (29 - 29) | CAJAMARCA | 24 (24 - 25) | CAJABAMBA            | 880   | 14 (12 - 16) |
| 2017 | Highlands | 29 (29 - 29) | CAJAMARCA | 24 (24 - 25) | CAJAMARCA            | 7443  | 26 (25 - 27) |
| 2017 | Highlands | 29 (29 - 29) | CAJAMARCA | 24 (24 - 25) | CELENDIN             | 607   | 0            |
| 2017 | Highlands | 29 (29 - 29) | CAJAMARCA | 24 (24 - 25) | CHOTA                | 1952  | 31 (29 - 33) |
| 2017 | Highlands | 29 (29 - 29) | CAJAMARCA | 24 (24 - 25) | CONTUMAZA            | 163   | 0            |
| 2017 | Highlands | 29 (29 - 29) | CAJAMARCA | 24 (24 - 25) | CUTERVO              | 1295  | 23 (20 - 25) |
| 2017 | Highlands | 29 (29 - 29) | CAJAMARCA | 24 (24 - 25) | HUALGAYOC            | 777   | 8 (6 - 10)   |
| 2017 | Highlands | 29 (29 - 29) | CAJAMARCA | 24 (24 - 25) | JAEN                 | 3334  | 41 (40 - 43) |
| 2017 | Highlands | 29 (29 - 29) | CAJAMARCA | 24 (24 - 25) | SAN IGNACIO          | 817   | 0            |
| 2017 | Highlands | 29 (29 - 29) | CAJAMARCA | 24 (24 - 25) | SAN MARCOS           | 418   | 0            |
| 2017 | Highlands | 29 (29 - 29) | CAJAMARCA | 24 (24 - 25) | SAN MIGUEL           | 161   | 0            |
| 2017 | Highlands | 29 (29 - 29) | CAJAMARCA | 24 (24 - 25) | SAN PABLO            | 116   | 0            |
| 2017 | Highlands | 29 (29 - 29) | CAJAMARCA | 24 (24 - 25) | SANTA CRUZ           | 172   | 7 (4 - 12)   |
| 2017 | Highlands | 29 (29 - 29) | CUSCO     | 31 (30 - 32) | ANTA                 | 267   | 0            |
| 2017 | Highlands | 29 (29 - 29) | CUSCO     | 31 (30 - 32) | CALCA                | 512   | 0            |
| 2017 | Highlands | 29 (29 - 29) | CUSCO     | 31 (30 - 32) | CANAS                | 267   | 0            |
| 2017 | Highlands | 29 (29 - 29) | CUSCO     | 31 (30 - 32) | CANCHIS              | 1946  | 25 (23 - 27) |
| 2017 | Highlands | 29 (29 - 29) | CUSCO     | 31 (30 - 32) | CHUMBIVILCAS         | 637   | 13 (10 - 16) |
| 2017 | Highlands | 29 (29 - 29) | CUSCO     | 31 (30 - 32) | CUSCO                | 12585 | 42 (41 - 42) |

|      |           |              |              |              |                |       |              |
|------|-----------|--------------|--------------|--------------|----------------|-------|--------------|
| 2017 | Highlands | 29 (29 - 29) | CUSCO        | 31 (30 - 32) | ESPINAR        | 1013  | 14 (11 - 16) |
| 2017 | Highlands | 29 (29 - 29) | CUSCO        | 31 (30 - 32) | LA CONVENCION  | 2373  | 24 (22 - 26) |
| 2017 | Highlands | 29 (29 - 29) | CUSCO        | 31 (30 - 32) | PARURO         | 69    | 0            |
| 2017 | Highlands | 29 (29 - 29) | CUSCO        | 31 (30 - 32) | PAUCARTAMBO    | 272   | 0            |
| 2017 | Highlands | 29 (29 - 29) | CUSCO        | 31 (30 - 32) | QUISPICANCHI   | 581   | 0            |
| 2017 | Highlands | 29 (29 - 29) | CUSCO        | 31 (30 - 32) | URUBAMBA       | 395   | 0            |
| 2017 | Highlands | 29 (29 - 29) | HUANCAVELICA | 19 (18 - 20) | ACOBAMBA       | 700   | 18 (15 - 21) |
| 2017 | Highlands | 29 (29 - 29) | HUANCAVELICA | 19 (18 - 20) | ANGARAES       | 718   | 13 (10 - 15) |
| 2017 | Highlands | 29 (29 - 29) | HUANCAVELICA | 19 (18 - 20) | CASTROVIRREYNA | 78    | 0            |
| 2017 | Highlands | 29 (29 - 29) | HUANCAVELICA | 19 (18 - 20) | CHURCAMPA      | 415   | 0            |
| 2017 | Highlands | 29 (29 - 29) | HUANCAVELICA | 19 (18 - 20) | HUANCAVELICA   | 2352  | 27 (25 - 29) |
| 2017 | Highlands | 29 (29 - 29) | HUANCAVELICA | 19 (18 - 20) | HUAYTARA       | 73    | 0            |
| 2017 | Highlands | 29 (29 - 29) | HUANCAVELICA | 19 (18 - 20) | TAYACAJA       | 1011  | 18 (15 - 20) |
| 2017 | Highlands | 29 (29 - 29) | HUANUCO      | 22 (21 - 22) | AMBO           | 624   | 0            |
| 2017 | Highlands | 29 (29 - 29) | HUANUCO      | 22 (21 - 22) | DOS DE MAYO    | 512   | 6 (4 - 9)    |
| 2017 | Highlands | 29 (29 - 29) | HUANUCO      | 22 (21 - 22) | HUACAYBAMBA    | 138   | 0            |
| 2017 | Highlands | 29 (29 - 29) | HUANUCO      | 22 (21 - 22) | HUAMALIES      | 721   | 8 (6 - 10)   |
| 2017 | Highlands | 29 (29 - 29) | HUANUCO      | 22 (21 - 22) | HUANUCO        | 6871  | 29 (27 - 30) |
| 2017 | Highlands | 29 (29 - 29) | HUANUCO      | 22 (21 - 22) | LAURICOCHA     | 209   | 0            |
| 2017 | Highlands | 29 (29 - 29) | HUANUCO      | 22 (21 - 22) | LEONCIO PRADO  | 3378  | 30 (28 - 31) |
| 2017 | Highlands | 29 (29 - 29) | HUANUCO      | 22 (21 - 22) | PACHITEA       | 987   | 0            |
| 2017 | Highlands | 29 (29 - 29) | HUANUCO      | 22 (21 - 22) | PUERTO INCA    | 416   | 0            |
| 2017 | Highlands | 29 (29 - 29) | HUANUCO      | 22 (21 - 22) | YAROWILCA      | 251   | 0            |
| 2017 | Highlands | 29 (29 - 29) | JUNIN        | 30 (29 - 30) | CHANCHAMAYO    | 2907  | 33 (31 - 34) |
| 2017 | Highlands | 29 (29 - 29) | JUNIN        | 30 (29 - 30) | CHUPACA        | 471   | 0            |
| 2017 | Highlands | 29 (29 - 29) | JUNIN        | 30 (29 - 30) | CONCEPCION     | 334   | 0            |
| 2017 | Highlands | 29 (29 - 29) | JUNIN        | 30 (29 - 30) | HUANCAYO       | 10290 | 36 (35 - 37) |
| 2017 | Highlands | 29 (29 - 29) | JUNIN        | 30 (29 - 30) | JAUIJA         | 1055  | 29 (26 - 32) |
| 2017 | Highlands | 29 (29 - 29) | JUNIN        | 30 (29 - 30) | JUNIN          | 348   | 10 (7 - 14)  |
| 2017 | Highlands | 29 (29 - 29) | JUNIN        | 30 (29 - 30) | SATIPO         | 2607  | 28 (26 - 30) |
| 2017 | Highlands | 29 (29 - 29) | JUNIN        | 30 (29 - 30) | TARMA          | 1399  | 9 (8 - 11)   |

|      |           |              |          |              |                         |       |              |
|------|-----------|--------------|----------|--------------|-------------------------|-------|--------------|
| 2017 | Highlands | 29 (29 - 29) | JUNIN    | 30 (29 - 30) | YAULI                   | 373   | 19 (15 - 23) |
| 2017 | Highlands | 29 (29 - 29) | PASCO    | 20 (19 - 21) | DANIEL ALCIDES CARRION  | 179   | 0            |
| 2017 | Highlands | 29 (29 - 29) | PASCO    | 20 (19 - 21) | OXAPAMPA                | 1900  | 15 (14 - 17) |
| 2017 | Highlands | 29 (29 - 29) | PASCO    | 20 (19 - 21) | PASCO                   | 2489  | 25 (23 - 27) |
| 2017 | Highlands | 29 (29 - 29) | PUNO     | 23 (22 - 23) | AZANGARO                | 1143  | 12 (10 - 14) |
| 2017 | Highlands | 29 (29 - 29) | PUNO     | 23 (22 - 23) | CARABAYA                | 516   | 11 (9 - 15)  |
| 2017 | Highlands | 29 (29 - 29) | PUNO     | 23 (22 - 23) | CHUCUITO                | 769   | 5 (4 - 7)    |
| 2017 | Highlands | 29 (29 - 29) | PUNO     | 23 (22 - 23) | EL COLLAO               | 732   | 10 (8 - 12)  |
| 2017 | Highlands | 29 (29 - 29) | PUNO     | 23 (22 - 23) | HUANCANE                | 592   | 11 (8 - 14)  |
| 2017 | Highlands | 29 (29 - 29) | PUNO     | 23 (22 - 23) | LAMPA                   | 236   | 5 (3 - 9)    |
| 2017 | Highlands | 29 (29 - 29) | PUNO     | 23 (22 - 23) | MELGAR                  | 877   | 22 (19 - 25) |
| 2017 | Highlands | 29 (29 - 29) | PUNO     | 23 (22 - 23) | MOHO                    | 79    | 0            |
| 2017 | Highlands | 29 (29 - 29) | PUNO     | 23 (22 - 23) | PUNO                    | 3484  | 32 (31 - 34) |
| 2017 | Highlands | 29 (29 - 29) | PUNO     | 23 (22 - 23) | SAN ANTONIO DE PUTINA   | 247   | 0            |
| 2017 | Highlands | 29 (29 - 29) | PUNO     | 23 (22 - 23) | SAN ROMAN               | 6121  | 29 (28 - 31) |
| 2017 | Highlands | 29 (29 - 29) | PUNO     | 23 (22 - 23) | SANDIA                  | 462   | 5 (3 - 7)    |
| 2017 | Highlands | 29 (29 - 29) | PUNO     | 23 (22 - 23) | YUNGUYO                 | 345   | 9 (6 - 13)   |
| 2018 | Amazon    | 28 (28 - 29) | AMAZONAS | 31 (30 - 33) | BAGUA                   | 1193  | 44 (41 - 47) |
| 2018 | Amazon    | 28 (28 - 29) | AMAZONAS | 31 (30 - 33) | BONGARA                 | 173   | 0            |
| 2018 | Amazon    | 28 (28 - 29) | AMAZONAS | 31 (30 - 33) | CHACHAPOYAS             | 1727  | 36 (34 - 39) |
| 2018 | Amazon    | 28 (28 - 29) | AMAZONAS | 31 (30 - 33) | CONDORCANQUI            | 428   | 7 (4 - 9)    |
| 2018 | Amazon    | 28 (28 - 29) | AMAZONAS | 31 (30 - 33) | LUYA                    | 166   | 0            |
| 2018 | Amazon    | 28 (28 - 29) | AMAZONAS | 31 (30 - 33) | RODRIGUEZ DE MENDOZA    | 130   | 0            |
| 2018 | Amazon    | 28 (28 - 29) | AMAZONAS | 31 (30 - 33) | UTCUBAMBA               | 1388  | 33 (31 - 36) |
| 2018 | Amazon    | 28 (28 - 29) | LORETO   | 26 (26 - 27) | ALTO AMAZONAS           | 3299  | 22 (20 - 23) |
| 2018 | Amazon    | 28 (28 - 29) | LORETO   | 26 (26 - 27) | DATEM DEL MARAÑON       | 582   | 0            |
| 2018 | Amazon    | 28 (28 - 29) | LORETO   | 26 (26 - 27) | LORETO                  | 656   | 0            |
| 2018 | Amazon    | 28 (28 - 29) | LORETO   | 26 (26 - 27) | MARISCAL RAMON CASTILLA | 974   | 4 (3 - 5)    |
| 2018 | Amazon    | 28 (28 - 29) | LORETO   | 26 (26 - 27) | MAYNAS                  | 10883 | 35 (34 - 36) |
| 2018 | Amazon    | 28 (28 - 29) | LORETO   | 26 (26 - 27) | PUTUMAYO                | 53    | 0            |
| 2018 | Amazon    | 28 (28 - 29) | LORETO   | 26 (26 - 27) | REQUENA                 | 790   | 12 (9 - 14)  |

|      |        |              |               |              |                  |       |              |
|------|--------|--------------|---------------|--------------|------------------|-------|--------------|
| 2018 | Amazon | 28 (28 - 29) | LORETO        | 26 (26 - 27) | UCAYALI          | 715   | 7 (5 - 9)    |
| 2018 | Amazon | 28 (28 - 29) | MADRE DE DIOS | 26 (25 - 28) | MANU             | 107   | 0            |
| 2018 | Amazon | 28 (28 - 29) | MADRE DE DIOS | 26 (25 - 28) | TAHUAMANU        | 126   | 16 (10 - 23) |
| 2018 | Amazon | 28 (28 - 29) | MADRE DE DIOS | 26 (25 - 28) | TAMBOPATA        | 3582  | 27 (26 - 29) |
| 2018 | Amazon | 28 (28 - 29) | SAN MARTIN    | 31 (30 - 32) | BELLAVISTA       | 563   | 0            |
| 2018 | Amazon | 28 (28 - 29) | SAN MARTIN    | 31 (30 - 32) | EL DORADO        | 470   | 0            |
| 2018 | Amazon | 28 (28 - 29) | SAN MARTIN    | 31 (30 - 32) | HUALLAGA         | 164   | 0            |
| 2018 | Amazon | 28 (28 - 29) | SAN MARTIN    | 31 (30 - 32) | LAMAS            | 660   | 0            |
| 2018 | Amazon | 28 (28 - 29) | SAN MARTIN    | 31 (30 - 32) | MARISCAL CACERES | 923   | 26 (24 - 29) |
| 2018 | Amazon | 28 (28 - 29) | SAN MARTIN    | 31 (30 - 32) | MOYOBAMBA        | 2463  | 36 (34 - 38) |
| 2018 | Amazon | 28 (28 - 29) | SAN MARTIN    | 31 (30 - 32) | PICOTA           | 418   | 0            |
| 2018 | Amazon | 28 (28 - 29) | SAN MARTIN    | 31 (30 - 32) | RIOJA            | 2222  | 27 (25 - 29) |
| 2018 | Amazon | 28 (28 - 29) | SAN MARTIN    | 31 (30 - 32) | SAN MARTIN       | 5193  | 47 (46 - 49) |
| 2018 | Amazon | 28 (28 - 29) | SAN MARTIN    | 31 (30 - 32) | TOCACHE          | 1350  | 22 (20 - 24) |
| 2018 | Amazon | 28 (28 - 29) | UCAYALI       | 28 (27 - 29) | ATALAYA          | 716   | 0            |
| 2018 | Amazon | 28 (28 - 29) | UCAYALI       | 28 (27 - 29) | CORONEL PORTILLO | 10217 | 33 (32 - 34) |
| 2018 | Amazon | 28 (28 - 29) | UCAYALI       | 28 (27 - 29) | PADRE ABAD       | 976   | 1 (1 - 2)    |
| 2018 | Amazon | 28 (28 - 29) | UCAYALI       | 28 (27 - 29) | PURUS            | 45    | 0            |
| 2018 | Coast  | 43 (42 - 43) | CALLAO        | 41 (40 - 41) | CALLAO           | 20024 | 41 (40 - 41) |
| 2018 | Coast  | 43 (42 - 43) | ICA           | 42 (42 - 43) | CHINCHA          | 4174  | 35 (33 - 36) |
| 2018 | Coast  | 43 (42 - 43) | ICA           | 42 (42 - 43) | ICA              | 8105  | 47 (46 - 48) |
| 2018 | Coast  | 43 (42 - 43) | ICA           | 42 (42 - 43) | NAZCA            | 1130  | 37 (34 - 40) |
| 2018 | Coast  | 43 (42 - 43) | ICA           | 42 (42 - 43) | PALPA            | 65    | 0            |
| 2018 | Coast  | 43 (42 - 43) | ICA           | 42 (42 - 43) | PISCO            | 2829  | 43 (41 - 44) |
| 2018 | Coast  | 43 (42 - 43) | LA LIBERTAD   | 37 (36 - 37) | ASCOPE           | 1244  | 30 (27 - 32) |
| 2018 | Coast  | 43 (42 - 43) | LA LIBERTAD   | 37 (36 - 37) | BOLIVAR          | 68    | 0            |
| 2018 | Coast  | 43 (42 - 43) | LA LIBERTAD   | 37 (36 - 37) | CHEPEN           | 1264  | 44 (41 - 46) |
| 2018 | Coast  | 43 (42 - 43) | LA LIBERTAD   | 37 (36 - 37) | GRAN CHIMU       | 137   | 0            |
| 2018 | Coast  | 43 (42 - 43) | LA LIBERTAD   | 37 (36 - 37) | JULCAN           | 236   | 0            |
| 2018 | Coast  | 43 (42 - 43) | LA LIBERTAD   | 37 (36 - 37) | OTUZCO           | 529   | 28 (24 - 32) |
| 2018 | Coast  | 43 (42 - 43) | LA LIBERTAD   | 37 (36 - 37) | PACASMAYO        | 1068  | 41 (38 - 44) |

|      |           |              |             |              |                       |        |              |
|------|-----------|--------------|-------------|--------------|-----------------------|--------|--------------|
| 2018 | Coast     | 43 (42 - 43) | LA LIBERTAD | 37 (36 - 37) | PATAZ                 | 678    | 0            |
| 2018 | Coast     | 43 (42 - 43) | LA LIBERTAD | 37 (36 - 37) | SANCHEZ CARRION       | 2296   | 20 (19 - 22) |
| 2018 | Coast     | 43 (42 - 43) | LA LIBERTAD | 37 (36 - 37) | SANTIAGO DE CHUCO     | 526    | 19 (16 - 23) |
| 2018 | Coast     | 43 (42 - 43) | LA LIBERTAD | 37 (36 - 37) | TRUJILLO              | 16624  | 44 (43 - 45) |
| 2018 | Coast     | 43 (42 - 43) | LA LIBERTAD | 37 (36 - 37) | VIRU                  | 991    | 0            |
| 2018 | Coast     | 43 (42 - 43) | LAMBAYEQUE  | 35 (34 - 35) | CHICLAYO              | 13753  | 41 (40 - 41) |
| 2018 | Coast     | 43 (42 - 43) | LAMBAYEQUE  | 35 (34 - 35) | FERREÑAFE             | 854    | 7 (5 - 9)    |
| 2018 | Coast     | 43 (42 - 43) | LAMBAYEQUE  | 35 (34 - 35) | LAMBAYEQUE            | 4974   | 23 (22 - 25) |
| 2018 | Coast     | 43 (42 - 43) | LIMA        | 45 (45 - 46) | BARRANCA              | 2223   | 41 (38 - 43) |
| 2018 | Coast     | 43 (42 - 43) | LIMA        | 45 (45 - 46) | CAÑETE                | 4110   | 36 (34 - 37) |
| 2018 | Coast     | 43 (42 - 43) | LIMA        | 45 (45 - 46) | HUARAL                | 2742   | 30 (28 - 32) |
| 2018 | Coast     | 43 (42 - 43) | LIMA        | 45 (45 - 46) | HUAROCHIRI            | 217    | 3 (1 - 6)    |
| 2018 | Coast     | 43 (42 - 43) | LIMA        | 45 (45 - 46) | HUAURA                | 4768   | 38 (37 - 40) |
| 2018 | Coast     | 43 (42 - 43) | LIMA        | 45 (45 - 46) | LIMA                  | 148099 | 46 (46 - 46) |
| 2018 | Coast     | 43 (42 - 43) | MOQUEGUA    | 48 (46 - 50) | ILO                   | 997    | 48 (45 - 51) |
| 2018 | Coast     | 43 (42 - 43) | MOQUEGUA    | 48 (46 - 50) | MARISCAL NIETO        | 1216   | 50 (47 - 52) |
| 2018 | Coast     | 43 (42 - 43) | PIURA       | 38 (37 - 39) | AYABACA               | 795    | 0            |
| 2018 | Coast     | 43 (42 - 43) | PIURA       | 38 (37 - 39) | HUANCABAMBA           | 786    | 1 (0 - 2)    |
| 2018 | Coast     | 43 (42 - 43) | PIURA       | 38 (37 - 39) | MORROPON              | 2399   | 33 (31 - 35) |
| 2018 | Coast     | 43 (42 - 43) | PIURA       | 38 (37 - 39) | PAITA                 | 1958   | 28 (26 - 30) |
| 2018 | Coast     | 43 (42 - 43) | PIURA       | 38 (37 - 39) | PIURA                 | 12430  | 39 (38 - 40) |
| 2018 | Coast     | 43 (42 - 43) | PIURA       | 38 (37 - 39) | SECHURA               | 610    | 2 (1 - 4)    |
| 2018 | Coast     | 43 (42 - 43) | PIURA       | 38 (37 - 39) | SULLANA               | 6701   | 55 (53 - 56) |
| 2018 | Coast     | 43 (42 - 43) | PIURA       | 38 (37 - 39) | TALARA                | 1474   | 33 (30 - 35) |
| 2018 | Coast     | 43 (42 - 43) | TACNA       | 48 (46 - 49) | TACNA                 | 5004   | 48 (47 - 49) |
| 2018 | Coast     | 43 (42 - 43) | TUMBES      | 46 (44 - 47) | CONTRALMIRANTE VILLAR | 124    | 0            |
| 2018 | Coast     | 43 (42 - 43) | TUMBES      | 46 (44 - 47) | TUMBES                | 3739   | 51 (49 - 53) |
| 2018 | Coast     | 43 (42 - 43) | TUMBES      | 46 (44 - 47) | ZARUMILLA             | 329    | 0            |
| 2018 | Highlands | 30 (30 - 30) | ANCASH      | 34 (33 - 35) | ANTONIO RAIMONDI      | 70     | 0            |
| 2018 | Highlands | 30 (30 - 30) | ANCASH      | 34 (33 - 35) | ASUNCION              | 120    | 0            |
| 2018 | Highlands | 30 (30 - 30) | ANCASH      | 34 (33 - 35) | BOLOGNESI             | 128    | 0            |



|      |           |              |          |              |                           |       |              |
|------|-----------|--------------|----------|--------------|---------------------------|-------|--------------|
| 2018 | Highlands | 30 (30 - 30) | ANCASH   | 34 (33 - 35) | CARHUAZ                   | 491   | 9 (6 - 11)   |
| 2018 | Highlands | 30 (30 - 30) | ANCASH   | 34 (33 - 35) | CARLOS FERMIN FITZCARRALD | 118   | 0            |
| 2018 | Highlands | 30 (30 - 30) | ANCASH   | 34 (33 - 35) | CASMA                     | 467   | 17 (14 - 21) |
| 2018 | Highlands | 30 (30 - 30) | ANCASH   | 34 (33 - 35) | HUARAZ                    | 4025  | 39 (38 - 41) |
| 2018 | Highlands | 30 (30 - 30) | ANCASH   | 34 (33 - 35) | HUARI                     | 616   | 11 (8 - 13)  |
| 2018 | Highlands | 30 (30 - 30) | ANCASH   | 34 (33 - 35) | HUARMEY                   | 111   | 5 (2 - 11)   |
| 2018 | Highlands | 30 (30 - 30) | ANCASH   | 34 (33 - 35) | HUAYLAS                   | 813   | 30 (27 - 34) |
| 2018 | Highlands | 30 (30 - 30) | ANCASH   | 34 (33 - 35) | MARISCAL LUZURIAGA        | 62    | 0            |
| 2018 | Highlands | 30 (30 - 30) | ANCASH   | 34 (33 - 35) | PALLASCA                  | 134   | 0            |
| 2018 | Highlands | 30 (30 - 30) | ANCASH   | 34 (33 - 35) | POMABAMBA                 | 382   | 14 (11 - 18) |
| 2018 | Highlands | 30 (30 - 30) | ANCASH   | 34 (33 - 35) | RECUAY                    | 117   | 14 (8 - 21)  |
| 2018 | Highlands | 30 (30 - 30) | ANCASH   | 34 (33 - 35) | SANTA                     | 8595  | 43 (42 - 44) |
| 2018 | Highlands | 30 (30 - 30) | ANCASH   | 34 (33 - 35) | SIHUAS                    | 253   | 0            |
| 2018 | Highlands | 30 (30 - 30) | ANCASH   | 34 (33 - 35) | YUNGAY                    | 472   | 0            |
| 2018 | Highlands | 30 (30 - 30) | APURIMAC | 27 (26 - 28) | ABANCAY                   | 2807  | 35 (33 - 37) |
| 2018 | Highlands | 30 (30 - 30) | APURIMAC | 27 (26 - 28) | ANDAHUAYLAS               | 2816  | 27 (26 - 29) |
| 2018 | Highlands | 30 (30 - 30) | APURIMAC | 27 (26 - 28) | AYMARAES                  | 125   | 0            |
| 2018 | Highlands | 30 (30 - 30) | APURIMAC | 27 (26 - 28) | CHINCHEROS                | 620   | 9 (7 - 12)   |
| 2018 | Highlands | 30 (30 - 30) | APURIMAC | 27 (26 - 28) | COTABAMBAS                | 767   | 17 (14 - 20) |
| 2018 | Highlands | 30 (30 - 30) | APURIMAC | 27 (26 - 28) | GRAU                      | 89    | 0            |
| 2018 | Highlands | 30 (30 - 30) | AREQUIPA | 44 (44 - 45) | AREQUIPA                  | 19220 | 47 (46 - 48) |
| 2018 | Highlands | 30 (30 - 30) | AREQUIPA | 44 (44 - 45) | CAMANA                    | 1049  | 37 (34 - 40) |
| 2018 | Highlands | 30 (30 - 30) | AREQUIPA | 44 (44 - 45) | CARAVELI                  | 166   | 0            |
| 2018 | Highlands | 30 (30 - 30) | AREQUIPA | 44 (44 - 45) | CASTILLA                  | 398   | 33 (28 - 38) |
| 2018 | Highlands | 30 (30 - 30) | AREQUIPA | 44 (44 - 45) | CAYLLOMA                  | 1329  | 22 (20 - 25) |
| 2018 | Highlands | 30 (30 - 30) | AREQUIPA | 44 (44 - 45) | CONDESUYOS                | 80    | 0            |
| 2018 | Highlands | 30 (30 - 30) | AREQUIPA | 44 (44 - 45) | ISLAY                     | 365   | 39 (34 - 44) |
| 2018 | Highlands | 30 (30 - 30) | AREQUIPA | 44 (44 - 45) | LA UNION                  | 60    | 0            |
| 2018 | Highlands | 30 (30 - 30) | AYACUCHO | 26 (26 - 27) | CANGALLO                  | 497   | 21 (18 - 25) |
| 2018 | Highlands | 30 (30 - 30) | AYACUCHO | 26 (26 - 27) | HUAMANGA                  | 6903  | 32 (31 - 33) |
| 2018 | Highlands | 30 (30 - 30) | AYACUCHO | 26 (26 - 27) | HUANCA SANCOS             | 63    | 0            |

|      |           |              |           |              |                      |       |              |
|------|-----------|--------------|-----------|--------------|----------------------|-------|--------------|
| 2018 | Highlands | 30 (30 - 30) | AYACUCHO  | 26 (26 - 27) | HUANTA               | 1587  | 20 (18 - 22) |
| 2018 | Highlands | 30 (30 - 30) | AYACUCHO  | 26 (26 - 27) | LA MAR               | 1662  | 21 (19 - 23) |
| 2018 | Highlands | 30 (30 - 30) | AYACUCHO  | 26 (26 - 27) | LUCANAS              | 458   | 14 (11 - 18) |
| 2018 | Highlands | 30 (30 - 30) | AYACUCHO  | 26 (26 - 27) | PARINACOCHAS         | 386   | 24 (19 - 28) |
| 2018 | Highlands | 30 (30 - 30) | AYACUCHO  | 26 (26 - 27) | PAUCAR DEL SARA SARA | 39    | 0            |
| 2018 | Highlands | 30 (30 - 30) | AYACUCHO  | 26 (26 - 27) | SUCRE                | 62    | 0            |
| 2018 | Highlands | 30 (30 - 30) | AYACUCHO  | 26 (26 - 27) | VICTOR FAJARDO       | 61    | 0            |
| 2018 | Highlands | 30 (30 - 30) | AYACUCHO  | 26 (26 - 27) | VILCAS HUAMAN        | 102   | 0            |
| 2018 | Highlands | 30 (30 - 30) | CAJAMARCA | 25 (24 - 26) | CAJABAMBA            | 845   | 14 (12 - 16) |
| 2018 | Highlands | 30 (30 - 30) | CAJAMARCA | 25 (24 - 26) | CAJAMARCA            | 7259  | 25 (24 - 26) |
| 2018 | Highlands | 30 (30 - 30) | CAJAMARCA | 25 (24 - 26) | CELENDIN             | 574   | 1 (0 - 2)    |
| 2018 | Highlands | 30 (30 - 30) | CAJAMARCA | 25 (24 - 26) | CHOTA                | 1963  | 31 (29 - 34) |
| 2018 | Highlands | 30 (30 - 30) | CAJAMARCA | 25 (24 - 26) | CONTUMAZA            | 134   | 0            |
| 2018 | Highlands | 30 (30 - 30) | CAJAMARCA | 25 (24 - 26) | CUTERVO              | 1395  | 17 (15 - 19) |
| 2018 | Highlands | 30 (30 - 30) | CAJAMARCA | 25 (24 - 26) | HUALGAYOC            | 766   | 9 (7 - 11)   |
| 2018 | Highlands | 30 (30 - 30) | CAJAMARCA | 25 (24 - 26) | JAEN                 | 3710  | 45 (44 - 47) |
| 2018 | Highlands | 30 (30 - 30) | CAJAMARCA | 25 (24 - 26) | SAN IGNACIO          | 812   | 0            |
| 2018 | Highlands | 30 (30 - 30) | CAJAMARCA | 25 (24 - 26) | SAN MARCOS           | 350   | 0            |
| 2018 | Highlands | 30 (30 - 30) | CAJAMARCA | 25 (24 - 26) | SAN MIGUEL           | 157   | 0            |
| 2018 | Highlands | 30 (30 - 30) | CAJAMARCA | 25 (24 - 26) | SAN PABLO            | 109   | 0            |
| 2018 | Highlands | 30 (30 - 30) | CAJAMARCA | 25 (24 - 26) | SANTA CRUZ           | 173   | 2 (0 - 5)    |
| 2018 | Highlands | 30 (30 - 30) | CUSCO     | 31 (30 - 32) | ACOMAYO              | 99    | 0            |
| 2018 | Highlands | 30 (30 - 30) | CUSCO     | 31 (30 - 32) | ANTA                 | 269   | 0            |
| 2018 | Highlands | 30 (30 - 30) | CUSCO     | 31 (30 - 32) | CALCA                | 527   | 0            |
| 2018 | Highlands | 30 (30 - 30) | CUSCO     | 31 (30 - 32) | CANAS                | 216   | 0            |
| 2018 | Highlands | 30 (30 - 30) | CUSCO     | 31 (30 - 32) | CANCHIS              | 1841  | 27 (25 - 29) |
| 2018 | Highlands | 30 (30 - 30) | CUSCO     | 31 (30 - 32) | CHUMBIVILCAS         | 849   | 12 (10 - 14) |
| 2018 | Highlands | 30 (30 - 30) | CUSCO     | 31 (30 - 32) | CUSCO                | 12344 | 41 (40 - 42) |
| 2018 | Highlands | 30 (30 - 30) | CUSCO     | 31 (30 - 32) | ESPINAR              | 980   | 17 (15 - 20) |
| 2018 | Highlands | 30 (30 - 30) | CUSCO     | 31 (30 - 32) | LA CONVENCION        | 2337  | 27 (25 - 29) |
| 2018 | Highlands | 30 (30 - 30) | CUSCO     | 31 (30 - 32) | PARURO               | 36    | 0            |

|      |           |              |              |              |                        |       |              |
|------|-----------|--------------|--------------|--------------|------------------------|-------|--------------|
| 2018 | Highlands | 30 (30 - 30) | CUSCO        | 31 (30 - 32) | PAUCARTAMBO            | 241   | 0            |
| 2018 | Highlands | 30 (30 - 30) | CUSCO        | 31 (30 - 32) | QUISPICANCHI           | 766   | 0            |
| 2018 | Highlands | 30 (30 - 30) | CUSCO        | 31 (30 - 32) | URUBAMBA               | 364   | 0            |
| 2018 | Highlands | 30 (30 - 30) | HUANCAVELICA | 19 (18 - 20) | ACOBAMBA               | 569   | 15 (12 - 18) |
| 2018 | Highlands | 30 (30 - 30) | HUANCAVELICA | 19 (18 - 20) | ANGARAES               | 710   | 16 (14 - 19) |
| 2018 | Highlands | 30 (30 - 30) | HUANCAVELICA | 19 (18 - 20) | CASTROVIRREYNA         | 67    | 0            |
| 2018 | Highlands | 30 (30 - 30) | HUANCAVELICA | 19 (18 - 20) | CHURCAMP               | 423   | 0            |
| 2018 | Highlands | 30 (30 - 30) | HUANCAVELICA | 19 (18 - 20) | HUANCAVELICA           | 2275  | 28 (26 - 29) |
| 2018 | Highlands | 30 (30 - 30) | HUANCAVELICA | 19 (18 - 20) | HUAYTARA               | 81    | 0            |
| 2018 | Highlands | 30 (30 - 30) | HUANCAVELICA | 19 (18 - 20) | TAYACAJA               | 1063  | 16 (14 - 18) |
| 2018 | Highlands | 30 (30 - 30) | HUANUCO      | 22 (21 - 23) | AMBO                   | 650   | 0            |
| 2018 | Highlands | 30 (30 - 30) | HUANUCO      | 22 (21 - 23) | DOS DE MAYO            | 467   | 6 (4 - 9)    |
| 2018 | Highlands | 30 (30 - 30) | HUANUCO      | 22 (21 - 23) | HUACAYBAMBA            | 180   | 0            |
| 2018 | Highlands | 30 (30 - 30) | HUANUCO      | 22 (21 - 23) | HUAMALIES              | 699   | 8 (6 - 10)   |
| 2018 | Highlands | 30 (30 - 30) | HUANUCO      | 22 (21 - 23) | HUANUCO                | 6841  | 30 (29 - 31) |
| 2018 | Highlands | 30 (30 - 30) | HUANUCO      | 22 (21 - 23) | LAURICOCHA             | 204   | 0            |
| 2018 | Highlands | 30 (30 - 30) | HUANUCO      | 22 (21 - 23) | LEONCIO PRADO          | 3184  | 28 (26 - 29) |
| 2018 | Highlands | 30 (30 - 30) | HUANUCO      | 22 (21 - 23) | MARAÑON                | 100   | 0            |
| 2018 | Highlands | 30 (30 - 30) | HUANUCO      | 22 (21 - 23) | PACHITEA               | 791   | 0            |
| 2018 | Highlands | 30 (30 - 30) | HUANUCO      | 22 (21 - 23) | PUERTO INCA            | 419   | 0            |
| 2018 | Highlands | 30 (30 - 30) | HUANUCO      | 22 (21 - 23) | YAROWILCA              | 268   | 0            |
| 2018 | Highlands | 30 (30 - 30) | JUNIN        | 32 (31 - 33) | CHANCHAMAYO            | 2894  | 37 (35 - 38) |
| 2018 | Highlands | 30 (30 - 30) | JUNIN        | 32 (31 - 33) | CHUPACA                | 414   | 0            |
| 2018 | Highlands | 30 (30 - 30) | JUNIN        | 32 (31 - 33) | CONCEPCION             | 309   | 0            |
| 2018 | Highlands | 30 (30 - 30) | JUNIN        | 32 (31 - 33) | HUANCAYO               | 10266 | 37 (36 - 38) |
| 2018 | Highlands | 30 (30 - 30) | JUNIN        | 32 (31 - 33) | JAUJA                  | 978   | 27 (25 - 30) |
| 2018 | Highlands | 30 (30 - 30) | JUNIN        | 32 (31 - 33) | JUNIN                  | 329   | 17 (13 - 22) |
| 2018 | Highlands | 30 (30 - 30) | JUNIN        | 32 (31 - 33) | SATIPO                 | 2614  | 29 (27 - 30) |
| 2018 | Highlands | 30 (30 - 30) | JUNIN        | 32 (31 - 33) | TARMA                  | 1374  | 13 (11 - 15) |
| 2018 | Highlands | 30 (30 - 30) | JUNIN        | 32 (31 - 33) | YAULI                  | 402   | 21 (17 - 25) |
| 2018 | Highlands | 30 (30 - 30) | PASCO        | 20 (19 - 22) | DANIEL ALCIDES CARRION | 181   | 0            |

|      |           |              |               |              |                         |       |              |
|------|-----------|--------------|---------------|--------------|-------------------------|-------|--------------|
| 2018 | Highlands | 30 (30 - 30) | PASCO         | 20 (19 - 22) | OXAPAMPA                | 1688  | 15 (13 - 17) |
| 2018 | Highlands | 30 (30 - 30) | PASCO         | 20 (19 - 22) | PASCO                   | 2276  | 26 (24 - 28) |
| 2018 | Highlands | 30 (30 - 30) | PUNO          | 25 (24 - 26) | AZANGARO                | 1106  | 13 (11 - 15) |
| 2018 | Highlands | 30 (30 - 30) | PUNO          | 25 (24 - 26) | CARABAYA                | 661   | 8 (6 - 10)   |
| 2018 | Highlands | 30 (30 - 30) | PUNO          | 25 (24 - 26) | CHUCUITO                | 714   | 7 (5 - 9)    |
| 2018 | Highlands | 30 (30 - 30) | PUNO          | 25 (24 - 26) | EL COLLAO               | 762   | 18 (15 - 20) |
| 2018 | Highlands | 30 (30 - 30) | PUNO          | 25 (24 - 26) | HUANCANE                | 643   | 18 (15 - 21) |
| 2018 | Highlands | 30 (30 - 30) | PUNO          | 25 (24 - 26) | LAMPA                   | 272   | 7 (5 - 11)   |
| 2018 | Highlands | 30 (30 - 30) | PUNO          | 25 (24 - 26) | MELGAR                  | 883   | 18 (15 - 21) |
| 2018 | Highlands | 30 (30 - 30) | PUNO          | 25 (24 - 26) | MOHO                    | 81    | 0            |
| 2018 | Highlands | 30 (30 - 30) | PUNO          | 25 (24 - 26) | PUNO                    | 3263  | 33 (32 - 35) |
| 2018 | Highlands | 30 (30 - 30) | PUNO          | 25 (24 - 26) | SAN ANTONIO DE PUTINA   | 227   | 0            |
| 2018 | Highlands | 30 (30 - 30) | PUNO          | 25 (24 - 26) | SAN ROMAN               | 6321  | 34 (33 - 35) |
| 2018 | Highlands | 30 (30 - 30) | PUNO          | 25 (24 - 26) | SANDIA                  | 487   | 4 (2 - 6)    |
| 2018 | Highlands | 30 (30 - 30) | PUNO          | 25 (24 - 26) | YUNGUYO                 | 328   | 10 (7 - 14)  |
| 2019 | Amazon    | 29 (28 - 29) | AMAZONAS      | 34 (33 - 35) | BAGUA                   | 1282  | 44 (41 - 47) |
| 2019 | Amazon    | 29 (28 - 29) | AMAZONAS      | 34 (33 - 35) | BONGARA                 | 186   | 0            |
| 2019 | Amazon    | 29 (28 - 29) | AMAZONAS      | 34 (33 - 35) | CHACHAPOYAS             | 1805  | 39 (36 - 41) |
| 2019 | Amazon    | 29 (28 - 29) | AMAZONAS      | 34 (33 - 35) | CONDORCANQUI            | 377   | 11 (8 - 15)  |
| 2019 | Amazon    | 29 (28 - 29) | AMAZONAS      | 34 (33 - 35) | LUYA                    | 114   | 0            |
| 2019 | Amazon    | 29 (28 - 29) | AMAZONAS      | 34 (33 - 35) | RODRIGUEZ DE MENDOZA    | 100   | 0            |
| 2019 | Amazon    | 29 (28 - 29) | AMAZONAS      | 34 (33 - 35) | UTCUBAMBA               | 1330  | 34 (32 - 37) |
| 2019 | Amazon    | 29 (28 - 29) | LORETO        | 26 (25 - 27) | ALTO AMAZONAS           | 3322  | 22 (20 - 23) |
| 2019 | Amazon    | 29 (28 - 29) | LORETO        | 26 (25 - 27) | DATEM DEL MARAÑON       | 530   | 0            |
| 2019 | Amazon    | 29 (28 - 29) | LORETO        | 26 (25 - 27) | LORETO                  | 746   | 0            |
| 2019 | Amazon    | 29 (28 - 29) | LORETO        | 26 (25 - 27) | MARISCAL RAMON CASTILLA | 926   | 8 (6 - 10)   |
| 2019 | Amazon    | 29 (28 - 29) | LORETO        | 26 (25 - 27) | MAYNAS                  | 10851 | 35 (34 - 36) |
| 2019 | Amazon    | 29 (28 - 29) | LORETO        | 26 (25 - 27) | PUTUMAYO                | 45    | 0            |
| 2019 | Amazon    | 29 (28 - 29) | LORETO        | 26 (25 - 27) | REQUENA                 | 665   | 0            |
| 2019 | Amazon    | 29 (28 - 29) | LORETO        | 26 (25 - 27) | UCAYALI                 | 799   | 2 (1 - 3)    |
| 2019 | Amazon    | 29 (28 - 29) | MADRE DE DIOS | 28 (26 - 29) | MANU                    | 83    | 5 (1 - 12)   |

|      |        |              |               |              |                  |       |              |
|------|--------|--------------|---------------|--------------|------------------|-------|--------------|
| 2019 | Amazon | 29 (28 - 29) | MADRE DE DIOS | 28 (26 - 29) | TAHUAMANU        | 134   | 10 (5 - 16)  |
| 2019 | Amazon | 29 (28 - 29) | MADRE DE DIOS | 28 (26 - 29) | TAMBOPATA        | 3528  | 29 (28 - 31) |
| 2019 | Amazon | 29 (28 - 29) | SAN MARTIN    | 32 (31 - 32) | BELLAVISTA       | 522   | 0            |
| 2019 | Amazon | 29 (28 - 29) | SAN MARTIN    | 32 (31 - 32) | EL DORADO        | 423   | 0            |
| 2019 | Amazon | 29 (28 - 29) | SAN MARTIN    | 32 (31 - 32) | HUALLAGA         | 170   | 0            |
| 2019 | Amazon | 29 (28 - 29) | SAN MARTIN    | 32 (31 - 32) | LAMAS            | 712   | 0            |
| 2019 | Amazon | 29 (28 - 29) | SAN MARTIN    | 32 (31 - 32) | MARISCAL CACERES | 1004  | 31 (28 - 34) |
| 2019 | Amazon | 29 (28 - 29) | SAN MARTIN    | 32 (31 - 32) | MOYOBAMBA        | 2508  | 37 (35 - 39) |
| 2019 | Amazon | 29 (28 - 29) | SAN MARTIN    | 32 (31 - 32) | PICOTA           | 391   | 0            |
| 2019 | Amazon | 29 (28 - 29) | SAN MARTIN    | 32 (31 - 32) | RIOJA            | 2175  | 30 (28 - 32) |
| 2019 | Amazon | 29 (28 - 29) | SAN MARTIN    | 32 (31 - 32) | SAN MARTIN       | 5483  | 45 (44 - 46) |
| 2019 | Amazon | 29 (28 - 29) | SAN MARTIN    | 32 (31 - 32) | TOCACHE          | 1370  | 23 (20 - 25) |
| 2019 | Amazon | 29 (28 - 29) | UCAYALI       | 28 (27 - 28) | ATALAYA          | 824   | 3 (2 - 4)    |
| 2019 | Amazon | 29 (28 - 29) | UCAYALI       | 28 (27 - 28) | CORONEL PORTILLO | 10758 | 32 (31 - 33) |
| 2019 | Amazon | 29 (28 - 29) | UCAYALI       | 28 (27 - 28) | PADRE ABAD       | 980   | 0            |
| 2019 | Amazon | 29 (28 - 29) | UCAYALI       | 28 (27 - 28) | PURUS            | 60    | 0            |
| 2019 | Coast  | 44 (44 - 44) | CALLAO        | 43 (42 - 44) | CALLAO           | 19281 | 43 (42 - 44) |
| 2019 | Coast  | 44 (44 - 44) | ICA           | 43 (42 - 44) | CHINCHA          | 4118  | 35 (33 - 36) |
| 2019 | Coast  | 44 (44 - 44) | ICA           | 43 (42 - 44) | ICA              | 7814  | 48 (47 - 49) |
| 2019 | Coast  | 44 (44 - 44) | ICA           | 43 (42 - 44) | NAZCA            | 1122  | 38 (35 - 41) |
| 2019 | Coast  | 44 (44 - 44) | ICA           | 43 (42 - 44) | PALPA            | 59    | 0            |
| 2019 | Coast  | 44 (44 - 44) | ICA           | 43 (42 - 44) | PISCO            | 2921  | 46 (44 - 47) |
| 2019 | Coast  | 44 (44 - 44) | LA LIBERTAD   | 37 (36 - 38) | ASCOPE           | 1080  | 34 (31 - 37) |
| 2019 | Coast  | 44 (44 - 44) | LA LIBERTAD   | 37 (36 - 38) | BOLIVAR          | 94    | 0            |
| 2019 | Coast  | 44 (44 - 44) | LA LIBERTAD   | 37 (36 - 38) | CHEPEN           | 1126  | 45 (42 - 48) |
| 2019 | Coast  | 44 (44 - 44) | LA LIBERTAD   | 37 (36 - 38) | GRAN CHIMU       | 132   | 0            |
| 2019 | Coast  | 44 (44 - 44) | LA LIBERTAD   | 37 (36 - 38) | JULCAN           | 229   | 0            |
| 2019 | Coast  | 44 (44 - 44) | LA LIBERTAD   | 37 (36 - 38) | OTUZCO           | 503   | 27 (23 - 31) |
| 2019 | Coast  | 44 (44 - 44) | LA LIBERTAD   | 37 (36 - 38) | PACASMAYO        | 1038  | 43 (40 - 46) |
| 2019 | Coast  | 44 (44 - 44) | LA LIBERTAD   | 37 (36 - 38) | PATAZ            | 679   | 0            |
| 2019 | Coast  | 44 (44 - 44) | LA LIBERTAD   | 37 (36 - 38) | SANCHEZ CARRION  | 2154  | 18 (16 - 19) |

|      |           |              |             |              |                           |        |              |
|------|-----------|--------------|-------------|--------------|---------------------------|--------|--------------|
| 2019 | Coast     | 44 (44 - 44) | LA LIBERTAD | 37 (36 - 38) | SANTIAGO DE CHUCO         | 556    | 29 (25 - 33) |
| 2019 | Coast     | 44 (44 - 44) | LA LIBERTAD | 37 (36 - 38) | TRUJILLO                  | 17084  | 44 (44 - 45) |
| 2019 | Coast     | 44 (44 - 44) | LA LIBERTAD | 37 (36 - 38) | VIRU                      | 1164   | 0            |
| 2019 | Coast     | 44 (44 - 44) | LAMBAYEQUE  | 37 (36 - 37) | CHICLAYO                  | 13508  | 43 (42 - 44) |
| 2019 | Coast     | 44 (44 - 44) | LAMBAYEQUE  | 37 (36 - 37) | FERREÑAFE                 | 765    | 3 (2 - 5)    |
| 2019 | Coast     | 44 (44 - 44) | LAMBAYEQUE  | 37 (36 - 37) | LAMBAYEQUE                | 4737   | 24 (23 - 25) |
| 2019 | Coast     | 44 (44 - 44) | LIMA        | 47 (46 - 47) | BARRANCA                  | 1978   | 39 (37 - 42) |
| 2019 | Coast     | 44 (44 - 44) | LIMA        | 47 (46 - 47) | CAÑETE                    | 3953   | 35 (34 - 37) |
| 2019 | Coast     | 44 (44 - 44) | LIMA        | 47 (46 - 47) | HUARAL                    | 2706   | 33 (31 - 35) |
| 2019 | Coast     | 44 (44 - 44) | LIMA        | 47 (46 - 47) | HUAROCHIRI                | 230    | 5 (2 - 8)    |
| 2019 | Coast     | 44 (44 - 44) | LIMA        | 47 (46 - 47) | HUAURA                    | 4488   | 40 (39 - 42) |
| 2019 | Coast     | 44 (44 - 44) | LIMA        | 47 (46 - 47) | LIMA                      | 143799 | 48 (47 - 48) |
| 2019 | Coast     | 44 (44 - 44) | MOQUEGUA    | 47 (45 - 49) | ILO                       | 1028   | 49 (46 - 52) |
| 2019 | Coast     | 44 (44 - 44) | MOQUEGUA    | 47 (45 - 49) | MARISCAL NIETO            | 1228   | 47 (44 - 49) |
| 2019 | Coast     | 44 (44 - 44) | PIURA       | 40 (39 - 40) | AYABACA                   | 773    | 0            |
| 2019 | Coast     | 44 (44 - 44) | PIURA       | 40 (39 - 40) | HUANCABAMBA               | 757    | 0            |
| 2019 | Coast     | 44 (44 - 44) | PIURA       | 40 (39 - 40) | MORROPON                  | 2392   | 36 (34 - 38) |
| 2019 | Coast     | 44 (44 - 44) | PIURA       | 40 (39 - 40) | PAITA                     | 1903   | 26 (24 - 28) |
| 2019 | Coast     | 44 (44 - 44) | PIURA       | 40 (39 - 40) | PIURA                     | 11430  | 41 (41 - 42) |
| 2019 | Coast     | 44 (44 - 44) | PIURA       | 40 (39 - 40) | SECHURA                   | 633    | 0            |
| 2019 | Coast     | 44 (44 - 44) | PIURA       | 40 (39 - 40) | SULLANA                   | 6599   | 57 (56 - 58) |
| 2019 | Coast     | 44 (44 - 44) | PIURA       | 40 (39 - 40) | TALARA                    | 1253   | 28 (25 - 30) |
| 2019 | Coast     | 44 (44 - 44) | TACNA       | 47 (46 - 49) | TACNA                     | 4846   | 48 (46 - 49) |
| 2019 | Coast     | 44 (44 - 44) | TUMBES      | 44 (42 - 45) | CONTRALMIRANTE VILLAR     | 124    | 0            |
| 2019 | Coast     | 44 (44 - 44) | TUMBES      | 44 (42 - 45) | TUMBES                    | 3676   | 49 (47 - 50) |
| 2019 | Coast     | 44 (44 - 44) | TUMBES      | 44 (42 - 45) | ZARUMILLA                 | 282    | 0            |
| 2019 | Highlands | 31 (30 - 31) | ANCASH      | 35 (35 - 36) | ANTONIO RAIMONDI          | 70     | 0            |
| 2019 | Highlands | 31 (30 - 31) | ANCASH      | 35 (35 - 36) | ASUNCION                  | 111    | 0            |
| 2019 | Highlands | 31 (30 - 31) | ANCASH      | 35 (35 - 36) | BOLOGNESI                 | 107    | 0            |
| 2019 | Highlands | 31 (30 - 31) | ANCASH      | 35 (35 - 36) | CARHUAZ                   | 485    | 8 (5 - 10)   |
| 2019 | Highlands | 31 (30 - 31) | ANCASH      | 35 (35 - 36) | CARLOS FERMIN FITZCARRALD | 112    | 0            |

|      |           |              |          |              |                    |       |              |
|------|-----------|--------------|----------|--------------|--------------------|-------|--------------|
| 2019 | Highlands | 31 (30 - 31) | ANCASH   | 35 (35 - 36) | CASMA              | 480   | 15 (12 - 19) |
| 2019 | Highlands | 31 (30 - 31) | ANCASH   | 35 (35 - 36) | HUARAZ             | 4090  | 38 (37 - 40) |
| 2019 | Highlands | 31 (30 - 31) | ANCASH   | 35 (35 - 36) | HUARI              | 633   | 19 (16 - 22) |
| 2019 | Highlands | 31 (30 - 31) | ANCASH   | 35 (35 - 36) | HUARMEY            | 210   | 19 (14 - 25) |
| 2019 | Highlands | 31 (30 - 31) | ANCASH   | 35 (35 - 36) | HUAYLAS            | 716   | 25 (21 - 28) |
| 2019 | Highlands | 31 (30 - 31) | ANCASH   | 35 (35 - 36) | MARISCAL LUZURIAGA | 86    | 0            |
| 2019 | Highlands | 31 (30 - 31) | ANCASH   | 35 (35 - 36) | PALLASCA           | 115   | 0            |
| 2019 | Highlands | 31 (30 - 31) | ANCASH   | 35 (35 - 36) | POMABAMBA          | 359   | 18 (14 - 22) |
| 2019 | Highlands | 31 (30 - 31) | ANCASH   | 35 (35 - 36) | RECUAY             | 124   | 23 (16 - 32) |
| 2019 | Highlands | 31 (30 - 31) | ANCASH   | 35 (35 - 36) | SANTA              | 8326  | 46 (45 - 47) |
| 2019 | Highlands | 31 (30 - 31) | ANCASH   | 35 (35 - 36) | SIHUAS             | 286   | 7 (5 - 11)   |
| 2019 | Highlands | 31 (30 - 31) | ANCASH   | 35 (35 - 36) | YUNGAY             | 455   | 0            |
| 2019 | Highlands | 31 (30 - 31) | APURIMAC | 26 (25 - 27) | ABANCAY            | 2743  | 35 (33 - 37) |
| 2019 | Highlands | 31 (30 - 31) | APURIMAC | 26 (25 - 27) | ANDAHUAYLAS        | 2711  | 25 (23 - 26) |
| 2019 | Highlands | 31 (30 - 31) | APURIMAC | 26 (25 - 27) | ANTABAMBA          | 37    | 0            |
| 2019 | Highlands | 31 (30 - 31) | APURIMAC | 26 (25 - 27) | AYMARAES           | 93    | 0            |
| 2019 | Highlands | 31 (30 - 31) | APURIMAC | 26 (25 - 27) | CHINCHEROS         | 577   | 13 (11 - 16) |
| 2019 | Highlands | 31 (30 - 31) | APURIMAC | 26 (25 - 27) | COTABAMBAS         | 741   | 13 (10 - 15) |
| 2019 | Highlands | 31 (30 - 31) | APURIMAC | 26 (25 - 27) | GRAU               | 78    | 0            |
| 2019 | Highlands | 31 (30 - 31) | AREQUIPA | 46 (45 - 47) | AREQUIPA           | 18460 | 50 (49 - 50) |
| 2019 | Highlands | 31 (30 - 31) | AREQUIPA | 46 (45 - 47) | CAMANA             | 1036  | 38 (35 - 41) |
| 2019 | Highlands | 31 (30 - 31) | AREQUIPA | 46 (45 - 47) | CARAVELI           | 121   | 0            |
| 2019 | Highlands | 31 (30 - 31) | AREQUIPA | 46 (45 - 47) | CASTILLA           | 393   | 28 (24 - 33) |
| 2019 | Highlands | 31 (30 - 31) | AREQUIPA | 46 (45 - 47) | CAYLLOMA           | 1376  | 19 (17 - 22) |
| 2019 | Highlands | 31 (30 - 31) | AREQUIPA | 46 (45 - 47) | CONDESUYOS         | 76    | 0            |
| 2019 | Highlands | 31 (30 - 31) | AREQUIPA | 46 (45 - 47) | ISLAY              | 354   | 39 (34 - 44) |
| 2019 | Highlands | 31 (30 - 31) | AREQUIPA | 46 (45 - 47) | LA UNION           | 65    | 0            |
| 2019 | Highlands | 31 (30 - 31) | AYACUCHO | 25 (25 - 26) | CANGALLO           | 418   | 20 (16 - 24) |
| 2019 | Highlands | 31 (30 - 31) | AYACUCHO | 25 (25 - 26) | HUAMANGA           | 6815  | 32 (31 - 33) |
| 2019 | Highlands | 31 (30 - 31) | AYACUCHO | 25 (25 - 26) | HUANCA SANCOS      | 46    | 0            |
| 2019 | Highlands | 31 (30 - 31) | AYACUCHO | 25 (25 - 26) | HUANTA             | 1595  | 16 (15 - 18) |

|      |           |              |           |              |                      |       |              |
|------|-----------|--------------|-----------|--------------|----------------------|-------|--------------|
| 2019 | Highlands | 31 (30 - 31) | AYACUCHO  | 25 (25 - 26) | LA MAR               | 1569  | 15 (13 - 17) |
| 2019 | Highlands | 31 (30 - 31) | AYACUCHO  | 25 (25 - 26) | LUCANAS              | 437   | 19 (15 - 23) |
| 2019 | Highlands | 31 (30 - 31) | AYACUCHO  | 25 (25 - 26) | PARINACOCHAS         | 426   | 21 (17 - 25) |
| 2019 | Highlands | 31 (30 - 31) | AYACUCHO  | 25 (25 - 26) | PAUCAR DEL SARA SARA | 46    | 0            |
| 2019 | Highlands | 31 (30 - 31) | AYACUCHO  | 25 (25 - 26) | SUCRE                | 72    | 0            |
| 2019 | Highlands | 31 (30 - 31) | AYACUCHO  | 25 (25 - 26) | VICTOR FAJARDO       | 48    | 0            |
| 2019 | Highlands | 31 (30 - 31) | AYACUCHO  | 25 (25 - 26) | VILCAS HUAMAN        | 88    | 0            |
| 2019 | Highlands | 31 (30 - 31) | CAJAMARCA | 26 (25 - 26) | CAJABAMBA            | 1088  | 19 (16 - 21) |
| 2019 | Highlands | 31 (30 - 31) | CAJAMARCA | 26 (25 - 26) | CAJAMARCA            | 7311  | 26 (25 - 27) |
| 2019 | Highlands | 31 (30 - 31) | CAJAMARCA | 26 (25 - 26) | CELENDIN             | 609   | 3 (2 - 4)    |
| 2019 | Highlands | 31 (30 - 31) | CAJAMARCA | 26 (25 - 26) | CHOTA                | 1817  | 30 (28 - 32) |
| 2019 | Highlands | 31 (30 - 31) | CAJAMARCA | 26 (25 - 26) | CONTUMAZA            | 126   | 0            |
| 2019 | Highlands | 31 (30 - 31) | CAJAMARCA | 26 (25 - 26) | CUTERVO              | 1287  | 21 (19 - 23) |
| 2019 | Highlands | 31 (30 - 31) | CAJAMARCA | 26 (25 - 26) | HUALGAYOC            | 704   | 18 (15 - 21) |
| 2019 | Highlands | 31 (30 - 31) | CAJAMARCA | 26 (25 - 26) | JAEN                 | 3587  | 43 (42 - 45) |
| 2019 | Highlands | 31 (30 - 31) | CAJAMARCA | 26 (25 - 26) | SAN IGNACIO          | 733   | 0            |
| 2019 | Highlands | 31 (30 - 31) | CAJAMARCA | 26 (25 - 26) | SAN MARCOS           | 345   | 0            |
| 2019 | Highlands | 31 (30 - 31) | CAJAMARCA | 26 (25 - 26) | SAN MIGUEL           | 150   | 0            |
| 2019 | Highlands | 31 (30 - 31) | CAJAMARCA | 26 (25 - 26) | SAN PABLO            | 116   | 0            |
| 2019 | Highlands | 31 (30 - 31) | CAJAMARCA | 26 (25 - 26) | SANTA CRUZ           | 154   | 1 (0 - 4)    |
| 2019 | Highlands | 31 (30 - 31) | CUSCO     | 31 (30 - 32) | ACOMAYO              | 90    | 0            |
| 2019 | Highlands | 31 (30 - 31) | CUSCO     | 31 (30 - 32) | ANTA                 | 223   | 0            |
| 2019 | Highlands | 31 (30 - 31) | CUSCO     | 31 (30 - 32) | CALCA                | 521   | 0            |
| 2019 | Highlands | 31 (30 - 31) | CUSCO     | 31 (30 - 32) | CANAS                | 204   | 0            |
| 2019 | Highlands | 31 (30 - 31) | CUSCO     | 31 (30 - 32) | CANCHIS              | 1829  | 30 (28 - 32) |
| 2019 | Highlands | 31 (30 - 31) | CUSCO     | 31 (30 - 32) | CHUMBIVILCAS         | 837   | 10 (8 - 12)  |
| 2019 | Highlands | 31 (30 - 31) | CUSCO     | 31 (30 - 32) | CUSCO                | 12196 | 41 (40 - 42) |
| 2019 | Highlands | 31 (30 - 31) | CUSCO     | 31 (30 - 32) | ESPINAR              | 916   | 18 (15 - 20) |
| 2019 | Highlands | 31 (30 - 31) | CUSCO     | 31 (30 - 32) | LA CONVENCION        | 2574  | 24 (22 - 25) |
| 2019 | Highlands | 31 (30 - 31) | CUSCO     | 31 (30 - 32) | PARURO               | 39    | 0            |
| 2019 | Highlands | 31 (30 - 31) | CUSCO     | 31 (30 - 32) | PAUCARTAMBO          | 210   | 0            |



|      |           |              |             |              |                        |       |              |
|------|-----------|--------------|-------------|--------------|------------------------|-------|--------------|
| 2019 | Highlands | 31 (30 - 31) | CUSCO       | 31 (30 - 32) | QUISPICANCHI           | 715   | 0            |
| 2019 | Highlands | 31 (30 - 31) | CUSCO       | 31 (30 - 32) | URUBAMBA               | 396   | 0            |
| 2019 | Highlands | 31 (30 - 31) | HUANCVELICA | 19 (18 - 20) | ACOBAMBA               | 595   | 11 (8 - 14)  |
| 2019 | Highlands | 31 (30 - 31) | HUANCVELICA | 19 (18 - 20) | ANGARAES               | 703   | 15 (13 - 18) |
| 2019 | Highlands | 31 (30 - 31) | HUANCVELICA | 19 (18 - 20) | CASTROVIRREYNA         | 67    | 0            |
| 2019 | Highlands | 31 (30 - 31) | HUANCVELICA | 19 (18 - 20) | CHURCAMPA              | 383   | 0            |
| 2019 | Highlands | 31 (30 - 31) | HUANCVELICA | 19 (18 - 20) | HUANCVELICA            | 2181  | 29 (28 - 31) |
| 2019 | Highlands | 31 (30 - 31) | HUANCVELICA | 19 (18 - 20) | HUAYTARA               | 74    | 0            |
| 2019 | Highlands | 31 (30 - 31) | HUANCVELICA | 19 (18 - 20) | TAYACAJA               | 1043  | 12 (10 - 14) |
| 2019 | Highlands | 31 (30 - 31) | HUANUCO     | 22 (22 - 23) | AMBO                   | 615   | 0            |
| 2019 | Highlands | 31 (30 - 31) | HUANUCO     | 22 (22 - 23) | DOS DE MAYO            | 505   | 7 (5 - 9)    |
| 2019 | Highlands | 31 (30 - 31) | HUANUCO     | 22 (22 - 23) | HUACAYBAMBA            | 215   | 0            |
| 2019 | Highlands | 31 (30 - 31) | HUANUCO     | 22 (22 - 23) | HUAMALIES              | 670   | 8 (6 - 11)   |
| 2019 | Highlands | 31 (30 - 31) | HUANUCO     | 22 (22 - 23) | HUANUCO                | 6776  | 30 (29 - 32) |
| 2019 | Highlands | 31 (30 - 31) | HUANUCO     | 22 (22 - 23) | LAURICOCHA             | 176   | 0            |
| 2019 | Highlands | 31 (30 - 31) | HUANUCO     | 22 (22 - 23) | LEONCIO PRADO          | 3023  | 30 (28 - 31) |
| 2019 | Highlands | 31 (30 - 31) | HUANUCO     | 22 (22 - 23) | MARAÑON                | 202   | 0            |
| 2019 | Highlands | 31 (30 - 31) | HUANUCO     | 22 (22 - 23) | PACHITEA               | 887   | 0            |
| 2019 | Highlands | 31 (30 - 31) | HUANUCO     | 22 (22 - 23) | PUERTO INCA            | 441   | 0            |
| 2019 | Highlands | 31 (30 - 31) | HUANUCO     | 22 (22 - 23) | YAROWILCA              | 257   | 0            |
| 2019 | Highlands | 31 (30 - 31) | JUNIN       | 32 (32 - 33) | CHANCHAMAYO            | 2833  | 37 (36 - 39) |
| 2019 | Highlands | 31 (30 - 31) | JUNIN       | 32 (32 - 33) | CHUPACA                | 437   | 0            |
| 2019 | Highlands | 31 (30 - 31) | JUNIN       | 32 (32 - 33) | CONCEPCION             | 330   | 0            |
| 2019 | Highlands | 31 (30 - 31) | JUNIN       | 32 (32 - 33) | HUANCAYO               | 10915 | 37 (36 - 38) |
| 2019 | Highlands | 31 (30 - 31) | JUNIN       | 32 (32 - 33) | JAUJA                  | 949   | 30 (27 - 33) |
| 2019 | Highlands | 31 (30 - 31) | JUNIN       | 32 (32 - 33) | JUNIN                  | 272   | 18 (14 - 24) |
| 2019 | Highlands | 31 (30 - 31) | JUNIN       | 32 (32 - 33) | SATIPO                 | 2690  | 28 (27 - 30) |
| 2019 | Highlands | 31 (30 - 31) | JUNIN       | 32 (32 - 33) | TARMA                  | 1309  | 16 (14 - 18) |
| 2019 | Highlands | 31 (30 - 31) | JUNIN       | 32 (32 - 33) | YAULI                  | 373   | 29 (24 - 34) |
| 2019 | Highlands | 31 (30 - 31) | PASCO       | 22 (20 - 23) | DANIEL ALCIDES CARRION | 191   | 0            |
| 2019 | Highlands | 31 (30 - 31) | PASCO       | 22 (20 - 23) | OXAPAMPA               | 1766  | 18 (16 - 20) |

|      |           |              |               |              |                         |      |              |
|------|-----------|--------------|---------------|--------------|-------------------------|------|--------------|
| 2019 | Highlands | 31 (30 - 31) | PASCO         | 22 (20 - 23) | PASCO                   | 2218 | 27 (25 - 29) |
| 2019 | Highlands | 31 (30 - 31) | PUNO          | 26 (26 - 27) | AZANGARO                | 1042 | 14 (12 - 16) |
| 2019 | Highlands | 31 (30 - 31) | PUNO          | 26 (26 - 27) | CARABAYA                | 592  | 8 (6 - 11)   |
| 2019 | Highlands | 31 (30 - 31) | PUNO          | 26 (26 - 27) | CHUCUITO                | 681  | 7 (5 - 10)   |
| 2019 | Highlands | 31 (30 - 31) | PUNO          | 26 (26 - 27) | EL COLLAO               | 643  | 10 (8 - 13)  |
| 2019 | Highlands | 31 (30 - 31) | PUNO          | 26 (26 - 27) | HUANCANE                | 516  | 14 (11 - 17) |
| 2019 | Highlands | 31 (30 - 31) | PUNO          | 26 (26 - 27) | LAMPA                   | 259  | 7 (4 - 11)   |
| 2019 | Highlands | 31 (30 - 31) | PUNO          | 26 (26 - 27) | MELGAR                  | 829  | 21 (18 - 24) |
| 2019 | Highlands | 31 (30 - 31) | PUNO          | 26 (26 - 27) | MOHO                    | 47   | 0            |
| 2019 | Highlands | 31 (30 - 31) | PUNO          | 26 (26 - 27) | PUNO                    | 3250 | 32 (31 - 34) |
| 2019 | Highlands | 31 (30 - 31) | PUNO          | 26 (26 - 27) | SAN ANTONIO DE PUTINA   | 165  | 0            |
| 2019 | Highlands | 31 (30 - 31) | PUNO          | 26 (26 - 27) | SAN ROMAN               | 6565 | 36 (34 - 37) |
| 2019 | Highlands | 31 (30 - 31) | PUNO          | 26 (26 - 27) | SANDIA                  | 431  | 10 (7 - 13)  |
| 2019 | Highlands | 31 (30 - 31) | PUNO          | 26 (26 - 27) | YUNGUYO                 | 350  | 13 (10 - 17) |
| 2020 | Amazon    | 27 (27 - 28) | AMAZONAS      | 36 (35 - 38) | BAGUA                   | 1152 | 46 (43 - 49) |
| 2020 | Amazon    | 27 (27 - 28) | AMAZONAS      | 36 (35 - 38) | BONGARA                 | 199  | 0            |
| 2020 | Amazon    | 27 (27 - 28) | AMAZONAS      | 36 (35 - 38) | CHACHAPOYAS             | 1603 | 44 (42 - 47) |
| 2020 | Amazon    | 27 (27 - 28) | AMAZONAS      | 36 (35 - 38) | CONDORCANQUI            | 341  | 20 (16 - 25) |
| 2020 | Amazon    | 27 (27 - 28) | AMAZONAS      | 36 (35 - 38) | LUYA                    | 177  | 0            |
| 2020 | Amazon    | 27 (27 - 28) | AMAZONAS      | 36 (35 - 38) | RODRIGUEZ DE MENDOZA    | 134  | 0            |
| 2020 | Amazon    | 27 (27 - 28) | AMAZONAS      | 36 (35 - 38) | UTCUBAMBA               | 1139 | 36 (33 - 39) |
| 2020 | Amazon    | 27 (27 - 28) | LORETO        | 21 (20 - 22) | ALTO AMAZONAS           | 3318 | 17 (16 - 19) |
| 2020 | Amazon    | 27 (27 - 28) | LORETO        | 21 (20 - 22) | DATEM DEL MARAÑON       | 561  | 0            |
| 2020 | Amazon    | 27 (27 - 28) | LORETO        | 21 (20 - 22) | LORETO                  | 742  | 0            |
| 2020 | Amazon    | 27 (27 - 28) | LORETO        | 21 (20 - 22) | MARISCAL RAMON CASTILLA | 786  | 7 (6 - 9)    |
| 2020 | Amazon    | 27 (27 - 28) | LORETO        | 21 (20 - 22) | MAYNAS                  | 9846 | 29 (28 - 30) |
| 2020 | Amazon    | 27 (27 - 28) | LORETO        | 21 (20 - 22) | PUTUMAYO                | 63   | 0            |
| 2020 | Amazon    | 27 (27 - 28) | LORETO        | 21 (20 - 22) | REQUENA                 | 685  | 0            |
| 2020 | Amazon    | 27 (27 - 28) | LORETO        | 21 (20 - 22) | UCAYALI                 | 730  | 2 (1 - 3)    |
| 2020 | Amazon    | 27 (27 - 28) | MADRE DE DIOS | 28 (26 - 29) | MANU                    | 143  | 0            |
| 2020 | Amazon    | 27 (27 - 28) | MADRE DE DIOS | 28 (26 - 29) | TAHUAMANU               | 136  | 3 (1 - 7)    |

|      |        |              |               |              |                   |       |              |
|------|--------|--------------|---------------|--------------|-------------------|-------|--------------|
| 2020 | Amazon | 27 (27 - 28) | MADRE DE DIOS | 28 (26 - 29) | TAMBOPATA         | 3465  | 30 (28 - 31) |
| 2020 | Amazon | 27 (27 - 28) | SAN MARTIN    | 32 (31 - 33) | BELLAVISTA        | 494   | 0            |
| 2020 | Amazon | 27 (27 - 28) | SAN MARTIN    | 32 (31 - 33) | EL DORADO         | 448   | 0            |
| 2020 | Amazon | 27 (27 - 28) | SAN MARTIN    | 32 (31 - 33) | HUALLAGA          | 147   | 0            |
| 2020 | Amazon | 27 (27 - 28) | SAN MARTIN    | 32 (31 - 33) | LAMAS             | 703   | 0            |
| 2020 | Amazon | 27 (27 - 28) | SAN MARTIN    | 32 (31 - 33) | MARISCAL CACERES  | 1054  | 39 (36 - 42) |
| 2020 | Amazon | 27 (27 - 28) | SAN MARTIN    | 32 (31 - 33) | MOYOBAMBA         | 2162  | 40 (38 - 42) |
| 2020 | Amazon | 27 (27 - 28) | SAN MARTIN    | 32 (31 - 33) | PICOTA            | 435   | 0            |
| 2020 | Amazon | 27 (27 - 28) | SAN MARTIN    | 32 (31 - 33) | RIOJA             | 2110  | 29 (27 - 31) |
| 2020 | Amazon | 27 (27 - 28) | SAN MARTIN    | 32 (31 - 33) | SAN MARTIN        | 4766  | 45 (44 - 47) |
| 2020 | Amazon | 27 (27 - 28) | SAN MARTIN    | 32 (31 - 33) | TOCACHE           | 1348  | 26 (24 - 29) |
| 2020 | Amazon | 27 (27 - 28) | UCAYALI       | 27 (26 - 27) | ATALAYA           | 763   | 0            |
| 2020 | Amazon | 27 (27 - 28) | UCAYALI       | 27 (26 - 27) | CORONEL PORTILLO  | 9952  | 32 (31 - 33) |
| 2020 | Amazon | 27 (27 - 28) | UCAYALI       | 27 (26 - 27) | PADRE ABAD        | 1120  | 0            |
| 2020 | Amazon | 27 (27 - 28) | UCAYALI       | 27 (26 - 27) | PURUS             | 35    | 0            |
| 2020 | Coast  | 45 (44 - 45) | CALLAO        | 42 (41 - 42) | CALLAO            | 17676 | 42 (41 - 42) |
| 2020 | Coast  | 45 (44 - 45) | ICA           | 41 (41 - 42) | CHINCHA           | 4191  | 34 (33 - 36) |
| 2020 | Coast  | 45 (44 - 45) | ICA           | 41 (41 - 42) | ICA               | 7938  | 47 (46 - 48) |
| 2020 | Coast  | 45 (44 - 45) | ICA           | 41 (41 - 42) | NAZCA             | 1159  | 34 (32 - 37) |
| 2020 | Coast  | 45 (44 - 45) | ICA           | 41 (41 - 42) | PALPA             | 94    | 0            |
| 2020 | Coast  | 45 (44 - 45) | ICA           | 41 (41 - 42) | PISCO             | 2759  | 40 (38 - 42) |
| 2020 | Coast  | 45 (44 - 45) | LA LIBERTAD   | 39 (39 - 40) | ASCOPE            | 968   | 29 (26 - 32) |
| 2020 | Coast  | 45 (44 - 45) | LA LIBERTAD   | 39 (39 - 40) | BOLIVAR           | 135   | 0            |
| 2020 | Coast  | 45 (44 - 45) | LA LIBERTAD   | 39 (39 - 40) | CHEPEN            | 973   | 38 (35 - 41) |
| 2020 | Coast  | 45 (44 - 45) | LA LIBERTAD   | 39 (39 - 40) | GRAN CHIMU        | 197   | 0            |
| 2020 | Coast  | 45 (44 - 45) | LA LIBERTAD   | 39 (39 - 40) | JULCAN            | 295   | 0            |
| 2020 | Coast  | 45 (44 - 45) | LA LIBERTAD   | 39 (39 - 40) | OTUZCO            | 578   | 29 (25 - 33) |
| 2020 | Coast  | 45 (44 - 45) | LA LIBERTAD   | 39 (39 - 40) | PACASMAYO         | 872   | 33 (30 - 36) |
| 2020 | Coast  | 45 (44 - 45) | LA LIBERTAD   | 39 (39 - 40) | PATAZ             | 712   | 0            |
| 2020 | Coast  | 45 (44 - 45) | LA LIBERTAD   | 39 (39 - 40) | SANCHEZ CARRION   | 2080  | 20 (19 - 22) |
| 2020 | Coast  | 45 (44 - 45) | LA LIBERTAD   | 39 (39 - 40) | SANTIAGO DE CHUCO | 533   | 22 (19 - 26) |

|      |           |              |             |              |                           |        |              |
|------|-----------|--------------|-------------|--------------|---------------------------|--------|--------------|
| 2020 | Coast     | 45 (44 - 45) | LA LIBERTAD | 39 (39 - 40) | TRUJILLO                  | 15363  | 50 (49 - 51) |
| 2020 | Coast     | 45 (44 - 45) | LA LIBERTAD | 39 (39 - 40) | VIRU                      | 1206   | 0            |
| 2020 | Coast     | 45 (44 - 45) | LAMBAYEQUE  | 34 (33 - 34) | CHICLAYO                  | 10905  | 39 (38 - 40) |
| 2020 | Coast     | 45 (44 - 45) | LAMBAYEQUE  | 34 (33 - 34) | FERREÑAFE                 | 536    | 1 (0 - 2)    |
| 2020 | Coast     | 45 (44 - 45) | LAMBAYEQUE  | 34 (33 - 34) | LAMBAYEQUE                | 3792   | 22 (21 - 24) |
| 2020 | Coast     | 45 (44 - 45) | LIMA        | 48 (47 - 48) | BARRANCA                  | 1926   | 39 (37 - 41) |
| 2020 | Coast     | 45 (44 - 45) | LIMA        | 48 (47 - 48) | CAÑETE                    | 3969   | 36 (35 - 38) |
| 2020 | Coast     | 45 (44 - 45) | LIMA        | 48 (47 - 48) | HUARAL                    | 2594   | 34 (32 - 35) |
| 2020 | Coast     | 45 (44 - 45) | LIMA        | 48 (47 - 48) | HUAROCHIRI                | 258    | 1 (0 - 3)    |
| 2020 | Coast     | 45 (44 - 45) | LIMA        | 48 (47 - 48) | HUAURA                    | 4390   | 45 (43 - 46) |
| 2020 | Coast     | 45 (44 - 45) | LIMA        | 48 (47 - 48) | LIMA                      | 133677 | 48 (48 - 49) |
| 2020 | Coast     | 45 (44 - 45) | MOQUEGUA    | 44 (42 - 46) | GENERAL SANCHEZ CERRO     | 41     | 0            |
| 2020 | Coast     | 45 (44 - 45) | MOQUEGUA    | 44 (42 - 46) | ILO                       | 1032   | 44 (41 - 47) |
| 2020 | Coast     | 45 (44 - 45) | MOQUEGUA    | 44 (42 - 46) | MARISCAL NIETO            | 1198   | 45 (42 - 48) |
| 2020 | Coast     | 45 (44 - 45) | PIURA       | 43 (43 - 44) | AYABACA                   | 889    | 0            |
| 2020 | Coast     | 45 (44 - 45) | PIURA       | 43 (43 - 44) | HUANCABAMBA               | 932    | 2 (1 - 3)    |
| 2020 | Coast     | 45 (44 - 45) | PIURA       | 43 (43 - 44) | MORROPON                  | 2195   | 32 (30 - 34) |
| 2020 | Coast     | 45 (44 - 45) | PIURA       | 43 (43 - 44) | PAITA                     | 1664   | 27 (24 - 29) |
| 2020 | Coast     | 45 (44 - 45) | PIURA       | 43 (43 - 44) | PIURA                     | 10264  | 48 (47 - 49) |
| 2020 | Coast     | 45 (44 - 45) | PIURA       | 43 (43 - 44) | SECHURA                   | 517    | 1 (0 - 2)    |
| 2020 | Coast     | 45 (44 - 45) | PIURA       | 43 (43 - 44) | SULLANA                   | 6084   | 64 (63 - 66) |
| 2020 | Coast     | 45 (44 - 45) | PIURA       | 43 (43 - 44) | TALARA                    | 1159   | 24 (22 - 27) |
| 2020 | Coast     | 45 (44 - 45) | TACNA       | 48 (47 - 49) | TACNA                     | 4390   | 48 (47 - 50) |
| 2020 | Coast     | 45 (44 - 45) | TUMBES      | 42 (40 - 43) | CONTRALMIRANTE VILLAR     | 130    | 0            |
| 2020 | Coast     | 45 (44 - 45) | TUMBES      | 42 (40 - 43) | TUMBES                    | 3466   | 49 (47 - 50) |
| 2020 | Coast     | 45 (44 - 45) | TUMBES      | 42 (40 - 43) | ZARUMILLA                 | 448    | 0            |
| 2020 | Highlands | 31 (30 - 31) | ANCASH      | 37 (37 - 38) | ANTONIO RAIMONDI          | 62     | 0            |
| 2020 | Highlands | 31 (30 - 31) | ANCASH      | 37 (37 - 38) | ASUNCION                  | 84     | 0            |
| 2020 | Highlands | 31 (30 - 31) | ANCASH      | 37 (37 - 38) | BOLOGNESI                 | 151    | 0            |
| 2020 | Highlands | 31 (30 - 31) | ANCASH      | 37 (37 - 38) | CARHUAZ                   | 642    | 10 (8 - 13)  |
| 2020 | Highlands | 31 (30 - 31) | ANCASH      | 37 (37 - 38) | CARLOS FERMIN FITZCARRALD | 126    | 0            |

|      |           |              |          |              |                    |       |              |
|------|-----------|--------------|----------|--------------|--------------------|-------|--------------|
| 2020 | Highlands | 31 (30 - 31) | ANCASH   | 37 (37 - 38) | CASMA              | 476   | 11 (8 - 14)  |
| 2020 | Highlands | 31 (30 - 31) | ANCASH   | 37 (37 - 38) | HUARAZ             | 3694  | 39 (37 - 40) |
| 2020 | Highlands | 31 (30 - 31) | ANCASH   | 37 (37 - 38) | HUARI              | 735   | 24 (21 - 28) |
| 2020 | Highlands | 31 (30 - 31) | ANCASH   | 37 (37 - 38) | HUARMEY            | 284   | 32 (26 - 37) |
| 2020 | Highlands | 31 (30 - 31) | ANCASH   | 37 (37 - 38) | HUAYLAS            | 866   | 32 (29 - 35) |
| 2020 | Highlands | 31 (30 - 31) | ANCASH   | 37 (37 - 38) | MARISCAL LUZURIAGA | 62    | 0            |
| 2020 | Highlands | 31 (30 - 31) | ANCASH   | 37 (37 - 38) | PALLASCA           | 135   | 0            |
| 2020 | Highlands | 31 (30 - 31) | ANCASH   | 37 (37 - 38) | POMABAMBA          | 359   | 27 (23 - 32) |
| 2020 | Highlands | 31 (30 - 31) | ANCASH   | 37 (37 - 38) | RECUAY             | 129   | 2 (0 - 7)    |
| 2020 | Highlands | 31 (30 - 31) | ANCASH   | 37 (37 - 38) | SANTA              | 7906  | 49 (48 - 50) |
| 2020 | Highlands | 31 (30 - 31) | ANCASH   | 37 (37 - 38) | SIHUAS             | 301   | 26 (21 - 31) |
| 2020 | Highlands | 31 (30 - 31) | ANCASH   | 37 (37 - 38) | YUNGAY             | 498   | 0            |
| 2020 | Highlands | 31 (30 - 31) | APURIMAC | 25 (24 - 26) | ABANCAY            | 2659  | 33 (31 - 34) |
| 2020 | Highlands | 31 (30 - 31) | APURIMAC | 25 (24 - 26) | ANDAHUAYLAS        | 2728  | 26 (24 - 28) |
| 2020 | Highlands | 31 (30 - 31) | APURIMAC | 25 (24 - 26) | ANTABAMBA          | 51    | 0            |
| 2020 | Highlands | 31 (30 - 31) | APURIMAC | 25 (24 - 26) | AYMARAES           | 160   | 0            |
| 2020 | Highlands | 31 (30 - 31) | APURIMAC | 25 (24 - 26) | CHINCHEROS         | 652   | 14 (11 - 17) |
| 2020 | Highlands | 31 (30 - 31) | APURIMAC | 25 (24 - 26) | COTABAMBAS         | 911   | 18 (15 - 20) |
| 2020 | Highlands | 31 (30 - 31) | APURIMAC | 25 (24 - 26) | GRAU               | 142   | 0            |
| 2020 | Highlands | 31 (30 - 31) | AREQUIPA | 47 (46 - 47) | AREQUIPA           | 17492 | 52 (51 - 52) |
| 2020 | Highlands | 31 (30 - 31) | AREQUIPA | 47 (46 - 47) | CAMANA             | 1000  | 34 (31 - 37) |
| 2020 | Highlands | 31 (30 - 31) | AREQUIPA | 47 (46 - 47) | CARAVELI           | 198   | 0            |
| 2020 | Highlands | 31 (30 - 31) | AREQUIPA | 47 (46 - 47) | CASTILLA           | 468   | 29 (25 - 33) |
| 2020 | Highlands | 31 (30 - 31) | AREQUIPA | 47 (46 - 47) | CAYLLOMA           | 1492  | 19 (17 - 21) |
| 2020 | Highlands | 31 (30 - 31) | AREQUIPA | 47 (46 - 47) | CONDESUYOS         | 105   | 0            |
| 2020 | Highlands | 31 (30 - 31) | AREQUIPA | 47 (46 - 47) | ISLAY              | 333   | 36 (31 - 41) |
| 2020 | Highlands | 31 (30 - 31) | AREQUIPA | 47 (46 - 47) | LA UNION           | 94    | 0            |
| 2020 | Highlands | 31 (30 - 31) | AYACUCHO | 26 (25 - 26) | CANGALLO           | 500   | 17 (14 - 21) |
| 2020 | Highlands | 31 (30 - 31) | AYACUCHO | 26 (25 - 26) | HUAMANGA           | 6380  | 33 (32 - 35) |
| 2020 | Highlands | 31 (30 - 31) | AYACUCHO | 26 (25 - 26) | HUANCA SANCOS      | 58    | 0            |
| 2020 | Highlands | 31 (30 - 31) | AYACUCHO | 26 (25 - 26) | HUANTA             | 1700  | 13 (12 - 15) |

|      |           |              |           |              |                      |       |              |
|------|-----------|--------------|-----------|--------------|----------------------|-------|--------------|
| 2020 | Highlands | 31 (30 - 31) | AYACUCHO  | 26 (25 - 26) | LA MAR               | 1826  | 20 (18 - 22) |
| 2020 | Highlands | 31 (30 - 31) | AYACUCHO  | 26 (25 - 26) | LUCANAS              | 542   | 22 (19 - 26) |
| 2020 | Highlands | 31 (30 - 31) | AYACUCHO  | 26 (25 - 26) | PARINACOCHAS         | 469   | 22 (18 - 26) |
| 2020 | Highlands | 31 (30 - 31) | AYACUCHO  | 26 (25 - 26) | PAUCAR DEL SARA SARA | 63    | 0            |
| 2020 | Highlands | 31 (30 - 31) | AYACUCHO  | 26 (25 - 26) | SUCRE                | 78    | 0            |
| 2020 | Highlands | 31 (30 - 31) | AYACUCHO  | 26 (25 - 26) | VICTOR FAJARDO       | 55    | 0            |
| 2020 | Highlands | 31 (30 - 31) | AYACUCHO  | 26 (25 - 26) | VILCAS HUAMAN        | 134   | 0            |
| 2020 | Highlands | 31 (30 - 31) | CAJAMARCA | 26 (25 - 26) | CAJABAMBA            | 1182  | 21 (18 - 23) |
| 2020 | Highlands | 31 (30 - 31) | CAJAMARCA | 26 (25 - 26) | CAJAMARCA            | 6524  | 28 (27 - 29) |
| 2020 | Highlands | 31 (30 - 31) | CAJAMARCA | 26 (25 - 26) | CELENDIN             | 627   | 4 (3 - 6)    |
| 2020 | Highlands | 31 (30 - 31) | CAJAMARCA | 26 (25 - 26) | CHOTA                | 1700  | 28 (25 - 30) |
| 2020 | Highlands | 31 (30 - 31) | CAJAMARCA | 26 (25 - 26) | CONTUMAZA            | 151   | 0            |
| 2020 | Highlands | 31 (30 - 31) | CAJAMARCA | 26 (25 - 26) | CUTERVO              | 1317  | 26 (24 - 29) |
| 2020 | Highlands | 31 (30 - 31) | CAJAMARCA | 26 (25 - 26) | HUALGAYOC            | 755   | 23 (20 - 26) |
| 2020 | Highlands | 31 (30 - 31) | CAJAMARCA | 26 (25 - 26) | JAEN                 | 3263  | 44 (42 - 45) |
| 2020 | Highlands | 31 (30 - 31) | CAJAMARCA | 26 (25 - 26) | SAN IGNACIO          | 893   | 0            |
| 2020 | Highlands | 31 (30 - 31) | CAJAMARCA | 26 (25 - 26) | SAN MARCOS           | 446   | 0            |
| 2020 | Highlands | 31 (30 - 31) | CAJAMARCA | 26 (25 - 26) | SAN MIGUEL           | 189   | 0            |
| 2020 | Highlands | 31 (30 - 31) | CAJAMARCA | 26 (25 - 26) | SAN PABLO            | 133   | 0            |
| 2020 | Highlands | 31 (30 - 31) | CAJAMARCA | 26 (25 - 26) | SANTA CRUZ           | 265   | 2 (0 - 4)    |
| 2020 | Highlands | 31 (30 - 31) | CUSCO     | 29 (28 - 30) | ACOMAYO              | 116   | 0            |
| 2020 | Highlands | 31 (30 - 31) | CUSCO     | 29 (28 - 30) | ANTA                 | 400   | 0            |
| 2020 | Highlands | 31 (30 - 31) | CUSCO     | 29 (28 - 30) | CALCA                | 593   | 0            |
| 2020 | Highlands | 31 (30 - 31) | CUSCO     | 29 (28 - 30) | CANAS                | 265   | 0            |
| 2020 | Highlands | 31 (30 - 31) | CUSCO     | 29 (28 - 30) | CANCHIS              | 1793  | 25 (23 - 28) |
| 2020 | Highlands | 31 (30 - 31) | CUSCO     | 29 (28 - 30) | CHUMBIVILCAS         | 1071  | 8 (7 - 10)   |
| 2020 | Highlands | 31 (30 - 31) | CUSCO     | 29 (28 - 30) | CUSCO                | 10963 | 42 (41 - 43) |
| 2020 | Highlands | 31 (30 - 31) | CUSCO     | 29 (28 - 30) | ESPINAR              | 968   | 19 (17 - 22) |
| 2020 | Highlands | 31 (30 - 31) | CUSCO     | 29 (28 - 30) | LA CONVENCION        | 2767  | 20 (19 - 22) |
| 2020 | Highlands | 31 (30 - 31) | CUSCO     | 29 (28 - 30) | PARURO               | 79    | 0            |
| 2020 | Highlands | 31 (30 - 31) | CUSCO     | 29 (28 - 30) | PAUCARTAMBO          | 270   | 0            |

|      |           |              |             |              |                        |       |              |
|------|-----------|--------------|-------------|--------------|------------------------|-------|--------------|
| 2020 | Highlands | 31 (30 - 31) | CUSCO       | 29 (28 - 30) | QUISPICANCHI           | 771   | 0            |
| 2020 | Highlands | 31 (30 - 31) | CUSCO       | 29 (28 - 30) | URUBAMBA               | 462   | 0            |
| 2020 | Highlands | 31 (30 - 31) | HUANCVELICA | 19 (18 - 20) | ACOBAMBA               | 658   | 15 (12 - 18) |
| 2020 | Highlands | 31 (30 - 31) | HUANCVELICA | 19 (18 - 20) | ANGARAES               | 708   | 13 (10 - 15) |
| 2020 | Highlands | 31 (30 - 31) | HUANCVELICA | 19 (18 - 20) | CASTROVIRREYNA         | 101   | 0            |
| 2020 | Highlands | 31 (30 - 31) | HUANCVELICA | 19 (18 - 20) | CHURCAMPA              | 448   | 0            |
| 2020 | Highlands | 31 (30 - 31) | HUANCVELICA | 19 (18 - 20) | HUANCVELICA            | 2386  | 27 (26 - 29) |
| 2020 | Highlands | 31 (30 - 31) | HUANCVELICA | 19 (18 - 20) | HUAYTARA               | 80    | 0            |
| 2020 | Highlands | 31 (30 - 31) | HUANCVELICA | 19 (18 - 20) | TAYACAJA               | 1357  | 16 (14 - 18) |
| 2020 | Highlands | 31 (30 - 31) | HUANUCO     | 20 (19 - 21) | AMBO                   | 755   | 0            |
| 2020 | Highlands | 31 (30 - 31) | HUANUCO     | 20 (19 - 21) | DOS DE MAYO            | 503   | 7 (5 - 9)    |
| 2020 | Highlands | 31 (30 - 31) | HUANUCO     | 20 (19 - 21) | HUACAYBAMBA            | 244   | 0            |
| 2020 | Highlands | 31 (30 - 31) | HUANUCO     | 20 (19 - 21) | HUAMALIES              | 793   | 11 (9 - 13)  |
| 2020 | Highlands | 31 (30 - 31) | HUANUCO     | 20 (19 - 21) | HUANUCO                | 6394  | 29 (28 - 31) |
| 2020 | Highlands | 31 (30 - 31) | HUANUCO     | 20 (19 - 21) | LAURICOCHA             | 223   | 0            |
| 2020 | Highlands | 31 (30 - 31) | HUANUCO     | 20 (19 - 21) | LEONCIO PRADO          | 2916  | 26 (24 - 27) |
| 2020 | Highlands | 31 (30 - 31) | HUANUCO     | 20 (19 - 21) | MARAÑON                | 213   | 0            |
| 2020 | Highlands | 31 (30 - 31) | HUANUCO     | 20 (19 - 21) | PACHITEA               | 974   | 0            |
| 2020 | Highlands | 31 (30 - 31) | HUANUCO     | 20 (19 - 21) | PUERTO INCA            | 502   | 0            |
| 2020 | Highlands | 31 (30 - 31) | HUANUCO     | 20 (19 - 21) | YAROWILCA              | 325   | 0            |
| 2020 | Highlands | 31 (30 - 31) | JUNIN       | 35 (34 - 36) | CHANCHAMAYO            | 2816  | 41 (39 - 43) |
| 2020 | Highlands | 31 (30 - 31) | JUNIN       | 35 (34 - 36) | CHUPACA                | 529   | 0            |
| 2020 | Highlands | 31 (30 - 31) | JUNIN       | 35 (34 - 36) | CONCEPCION             | 512   | 0            |
| 2020 | Highlands | 31 (30 - 31) | JUNIN       | 35 (34 - 36) | HUANCAYO               | 10093 | 43 (42 - 44) |
| 2020 | Highlands | 31 (30 - 31) | JUNIN       | 35 (34 - 36) | JAUJA                  | 1061  | 29 (26 - 32) |
| 2020 | Highlands | 31 (30 - 31) | JUNIN       | 35 (34 - 36) | JUNIN                  | 321   | 16 (12 - 20) |
| 2020 | Highlands | 31 (30 - 31) | JUNIN       | 35 (34 - 36) | SATIPO                 | 2620  | 26 (24 - 27) |
| 2020 | Highlands | 31 (30 - 31) | JUNIN       | 35 (34 - 36) | TARMA                  | 1277  | 19 (17 - 22) |
| 2020 | Highlands | 31 (30 - 31) | JUNIN       | 35 (34 - 36) | YAULI                  | 337   | 23 (18 - 28) |
| 2020 | Highlands | 31 (30 - 31) | PASCO       | 22 (21 - 23) | DANIEL ALCIDES CARRION | 220   | 0            |
| 2020 | Highlands | 31 (30 - 31) | PASCO       | 22 (21 - 23) | OXAPAMPA               | 1740  | 18 (16 - 20) |

---

|      |           |              |       |              |                       |      |              |
|------|-----------|--------------|-------|--------------|-----------------------|------|--------------|
| 2020 | Highlands | 31 (30 - 31) | PASCO | 22 (21 - 23) | PASCO                 | 2232 | 27 (25 - 29) |
| 2020 | Highlands | 31 (30 - 31) | PUNO  | 26 (25 - 26) | AZANGARO              | 1218 | 16 (14 - 18) |
| 2020 | Highlands | 31 (30 - 31) | PUNO  | 26 (25 - 26) | CARABAYA              | 825  | 19 (16 - 21) |
| 2020 | Highlands | 31 (30 - 31) | PUNO  | 26 (25 - 26) | CHUCUITO              | 758  | 9 (7 - 12)   |
| 2020 | Highlands | 31 (30 - 31) | PUNO  | 26 (25 - 26) | EL COLLAO             | 680  | 15 (12 - 18) |
| 2020 | Highlands | 31 (30 - 31) | PUNO  | 26 (25 - 26) | HUANCANE              | 657  | 18 (15 - 21) |
| 2020 | Highlands | 31 (30 - 31) | PUNO  | 26 (25 - 26) | LAMPA                 | 322  | 9 (6 - 12)   |
| 2020 | Highlands | 31 (30 - 31) | PUNO  | 26 (25 - 26) | MELGAR                | 943  | 25 (22 - 27) |
| 2020 | Highlands | 31 (30 - 31) | PUNO  | 26 (25 - 26) | MOHO                  | 109  | 0            |
| 2020 | Highlands | 31 (30 - 31) | PUNO  | 26 (25 - 26) | PUNO                  | 2925 | 30 (28 - 32) |
| 2020 | Highlands | 31 (30 - 31) | PUNO  | 26 (25 - 26) | SAN ANTONIO DE PUTINA | 207  | 0            |
| 2020 | Highlands | 31 (30 - 31) | PUNO  | 26 (25 - 26) | SAN ROMAN             | 5646 | 36 (34 - 37) |
| 2020 | Highlands | 31 (30 - 31) | PUNO  | 26 (25 - 26) | SANDIA                | 641  | 11 (9 - 14)  |
| 2020 | Highlands | 31 (30 - 31) | PUNO  | 26 (25 - 26) | YUNGUYO               | 347  | 15 (11 - 19) |

---



**Sample = 3,394,988 births**

2012 = 73,166  
2013 = 215,244  
2014 = 308,130  
2015 = 417,416  
2016 = 459,738  
2017 = 480,487  
2018 = 494,032  
2019 = 485,269  
2020 = 461,506

**Sample = 3,393,677 births**

Complete-case in birthweight

**Sample = 3,393,064 births**

Birthweight between 500-5,500 g

**Sample = 3,392,757 births**

Complete-case gestational age

**Sample = 3,392,623 births**

Gestational age between 22-44 weeks

**Sample = 3,381,448 births**

Dropped if missing information on delivery mode

**Sample = 3,380,995 births**

Complete-case geography variables

**Sample = 3,376,989 births**

Complete-case health insurance

**Sample = 3,376,114 births**

Complete-case maternal education

**Sample = 3,376,114 births**

Complete-case attendance level

**Sample = 3,376,062 births**

Complete-case maternal age and 9+ years

**Total sample = 3,376,062 births**

99.4% of initial sample size

Percentage of cesarean and 95% CI by regions

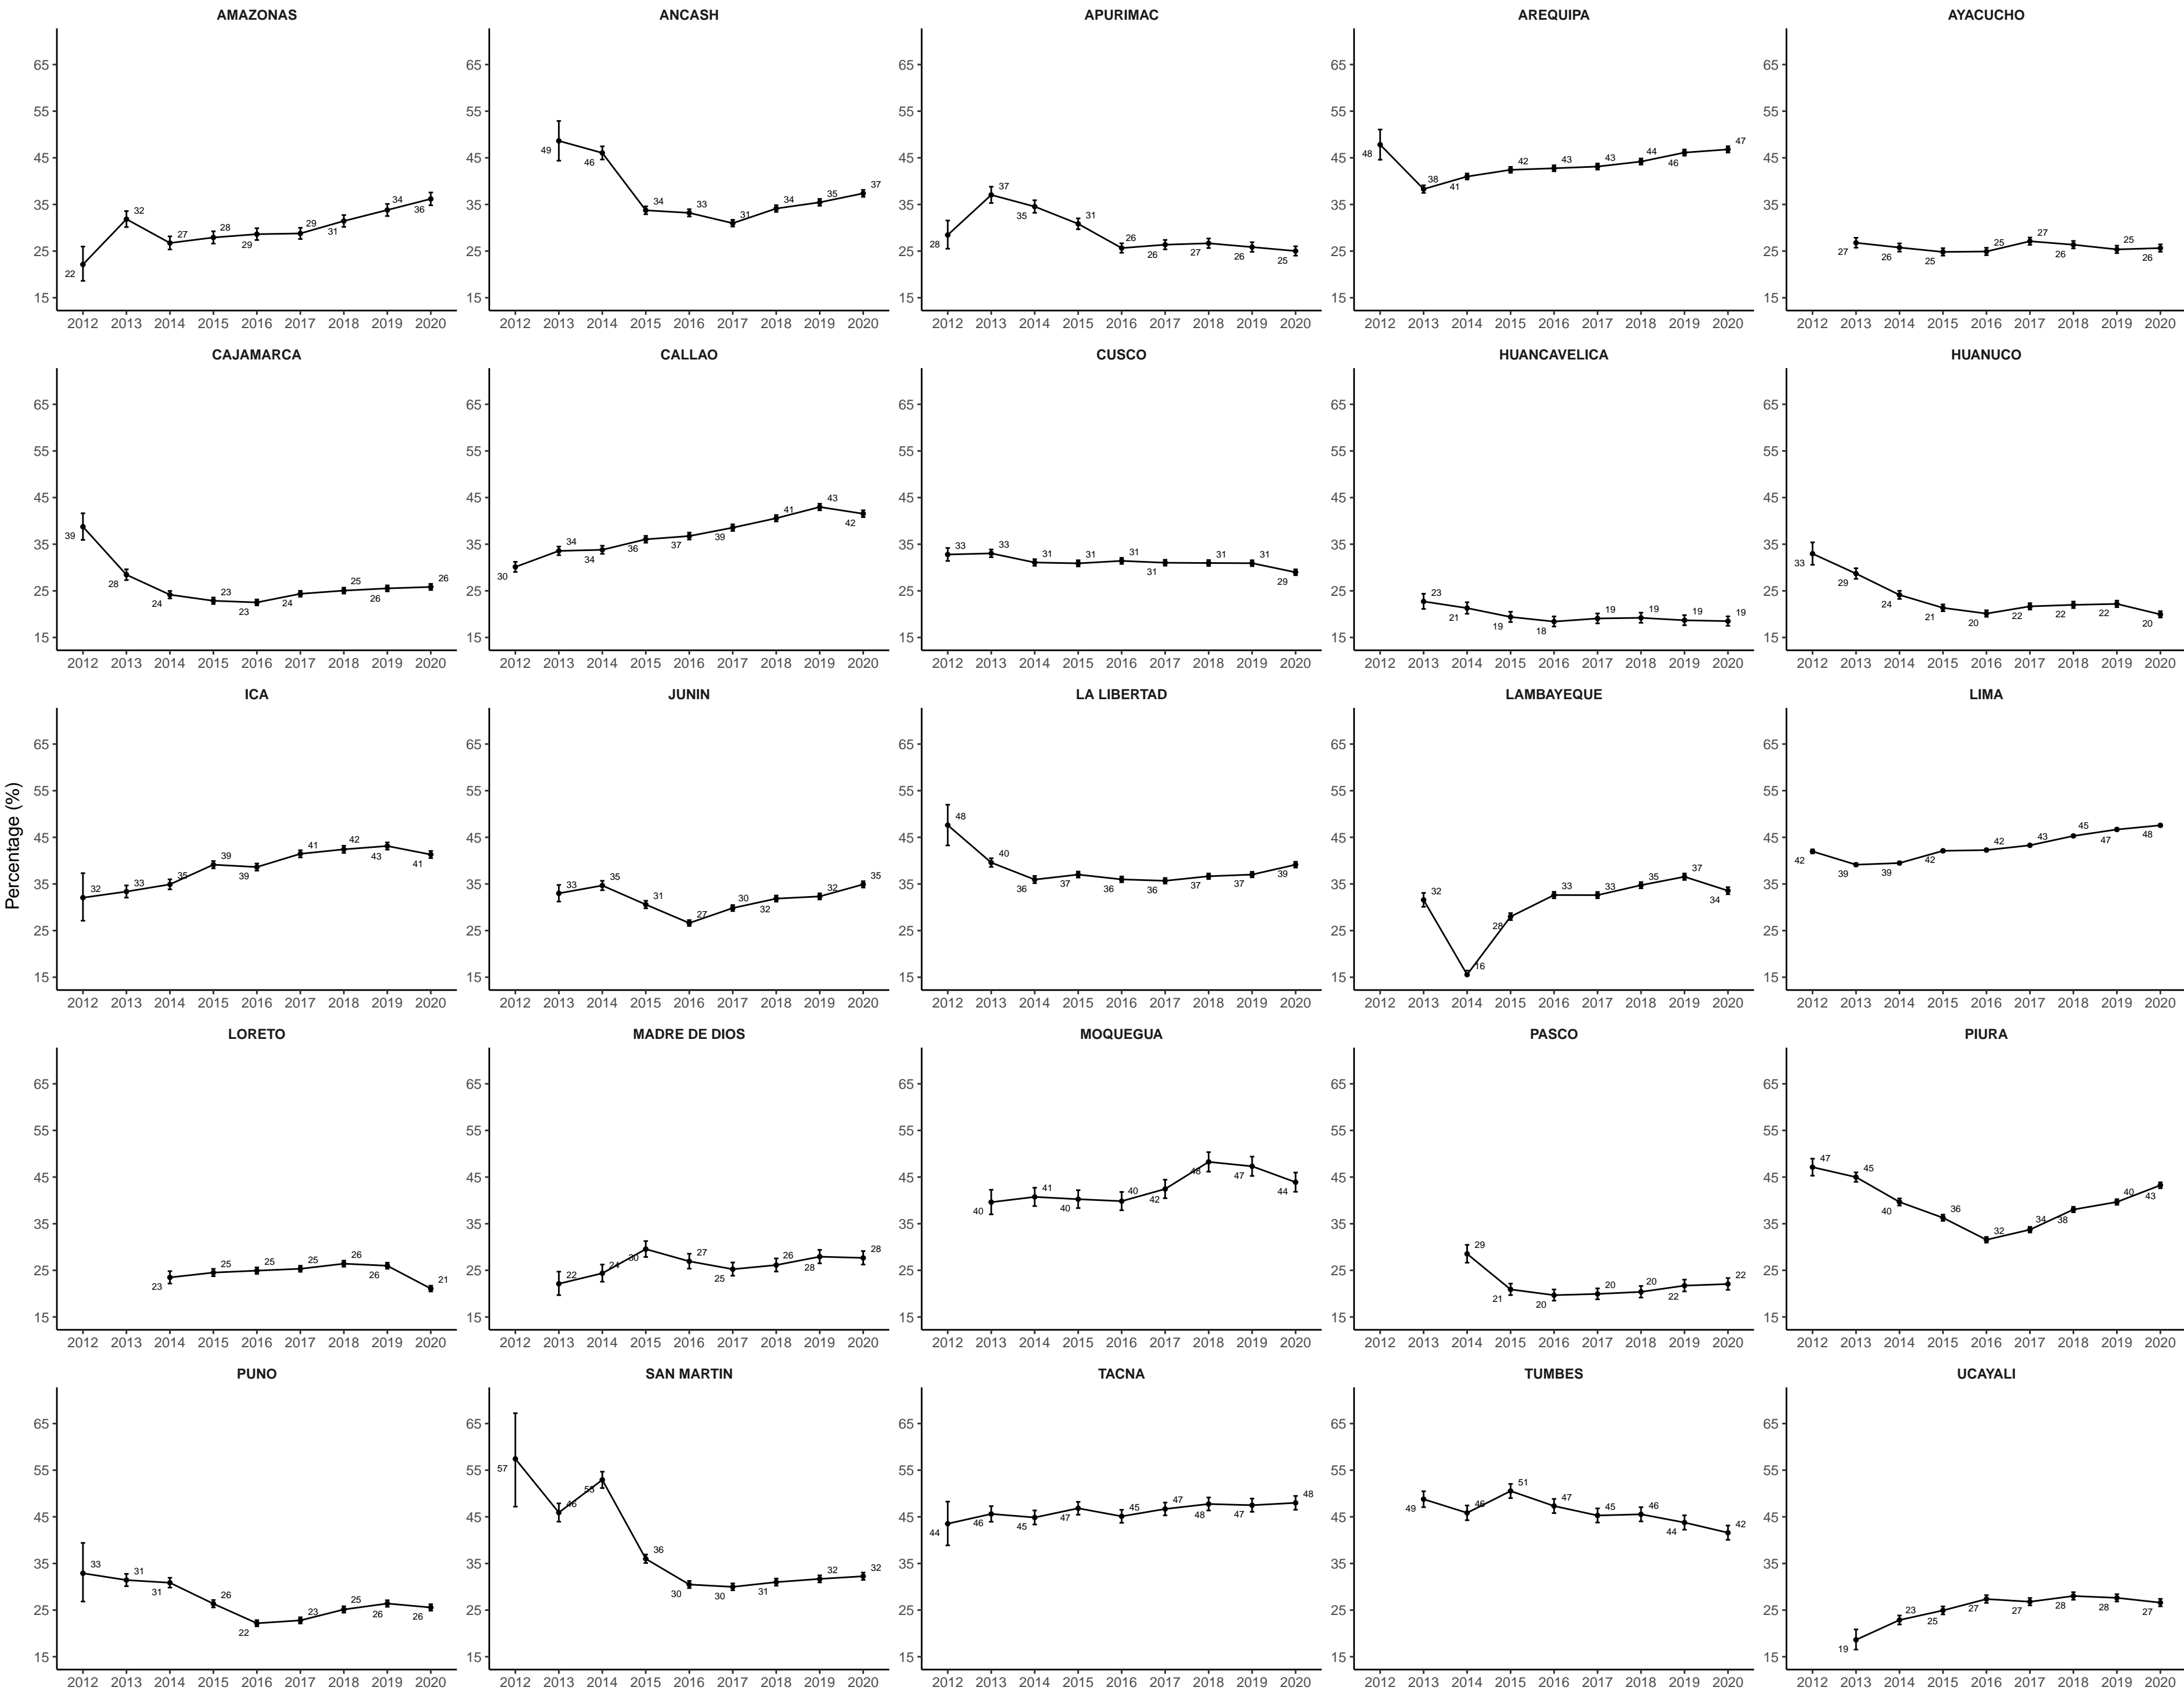

Year of birth

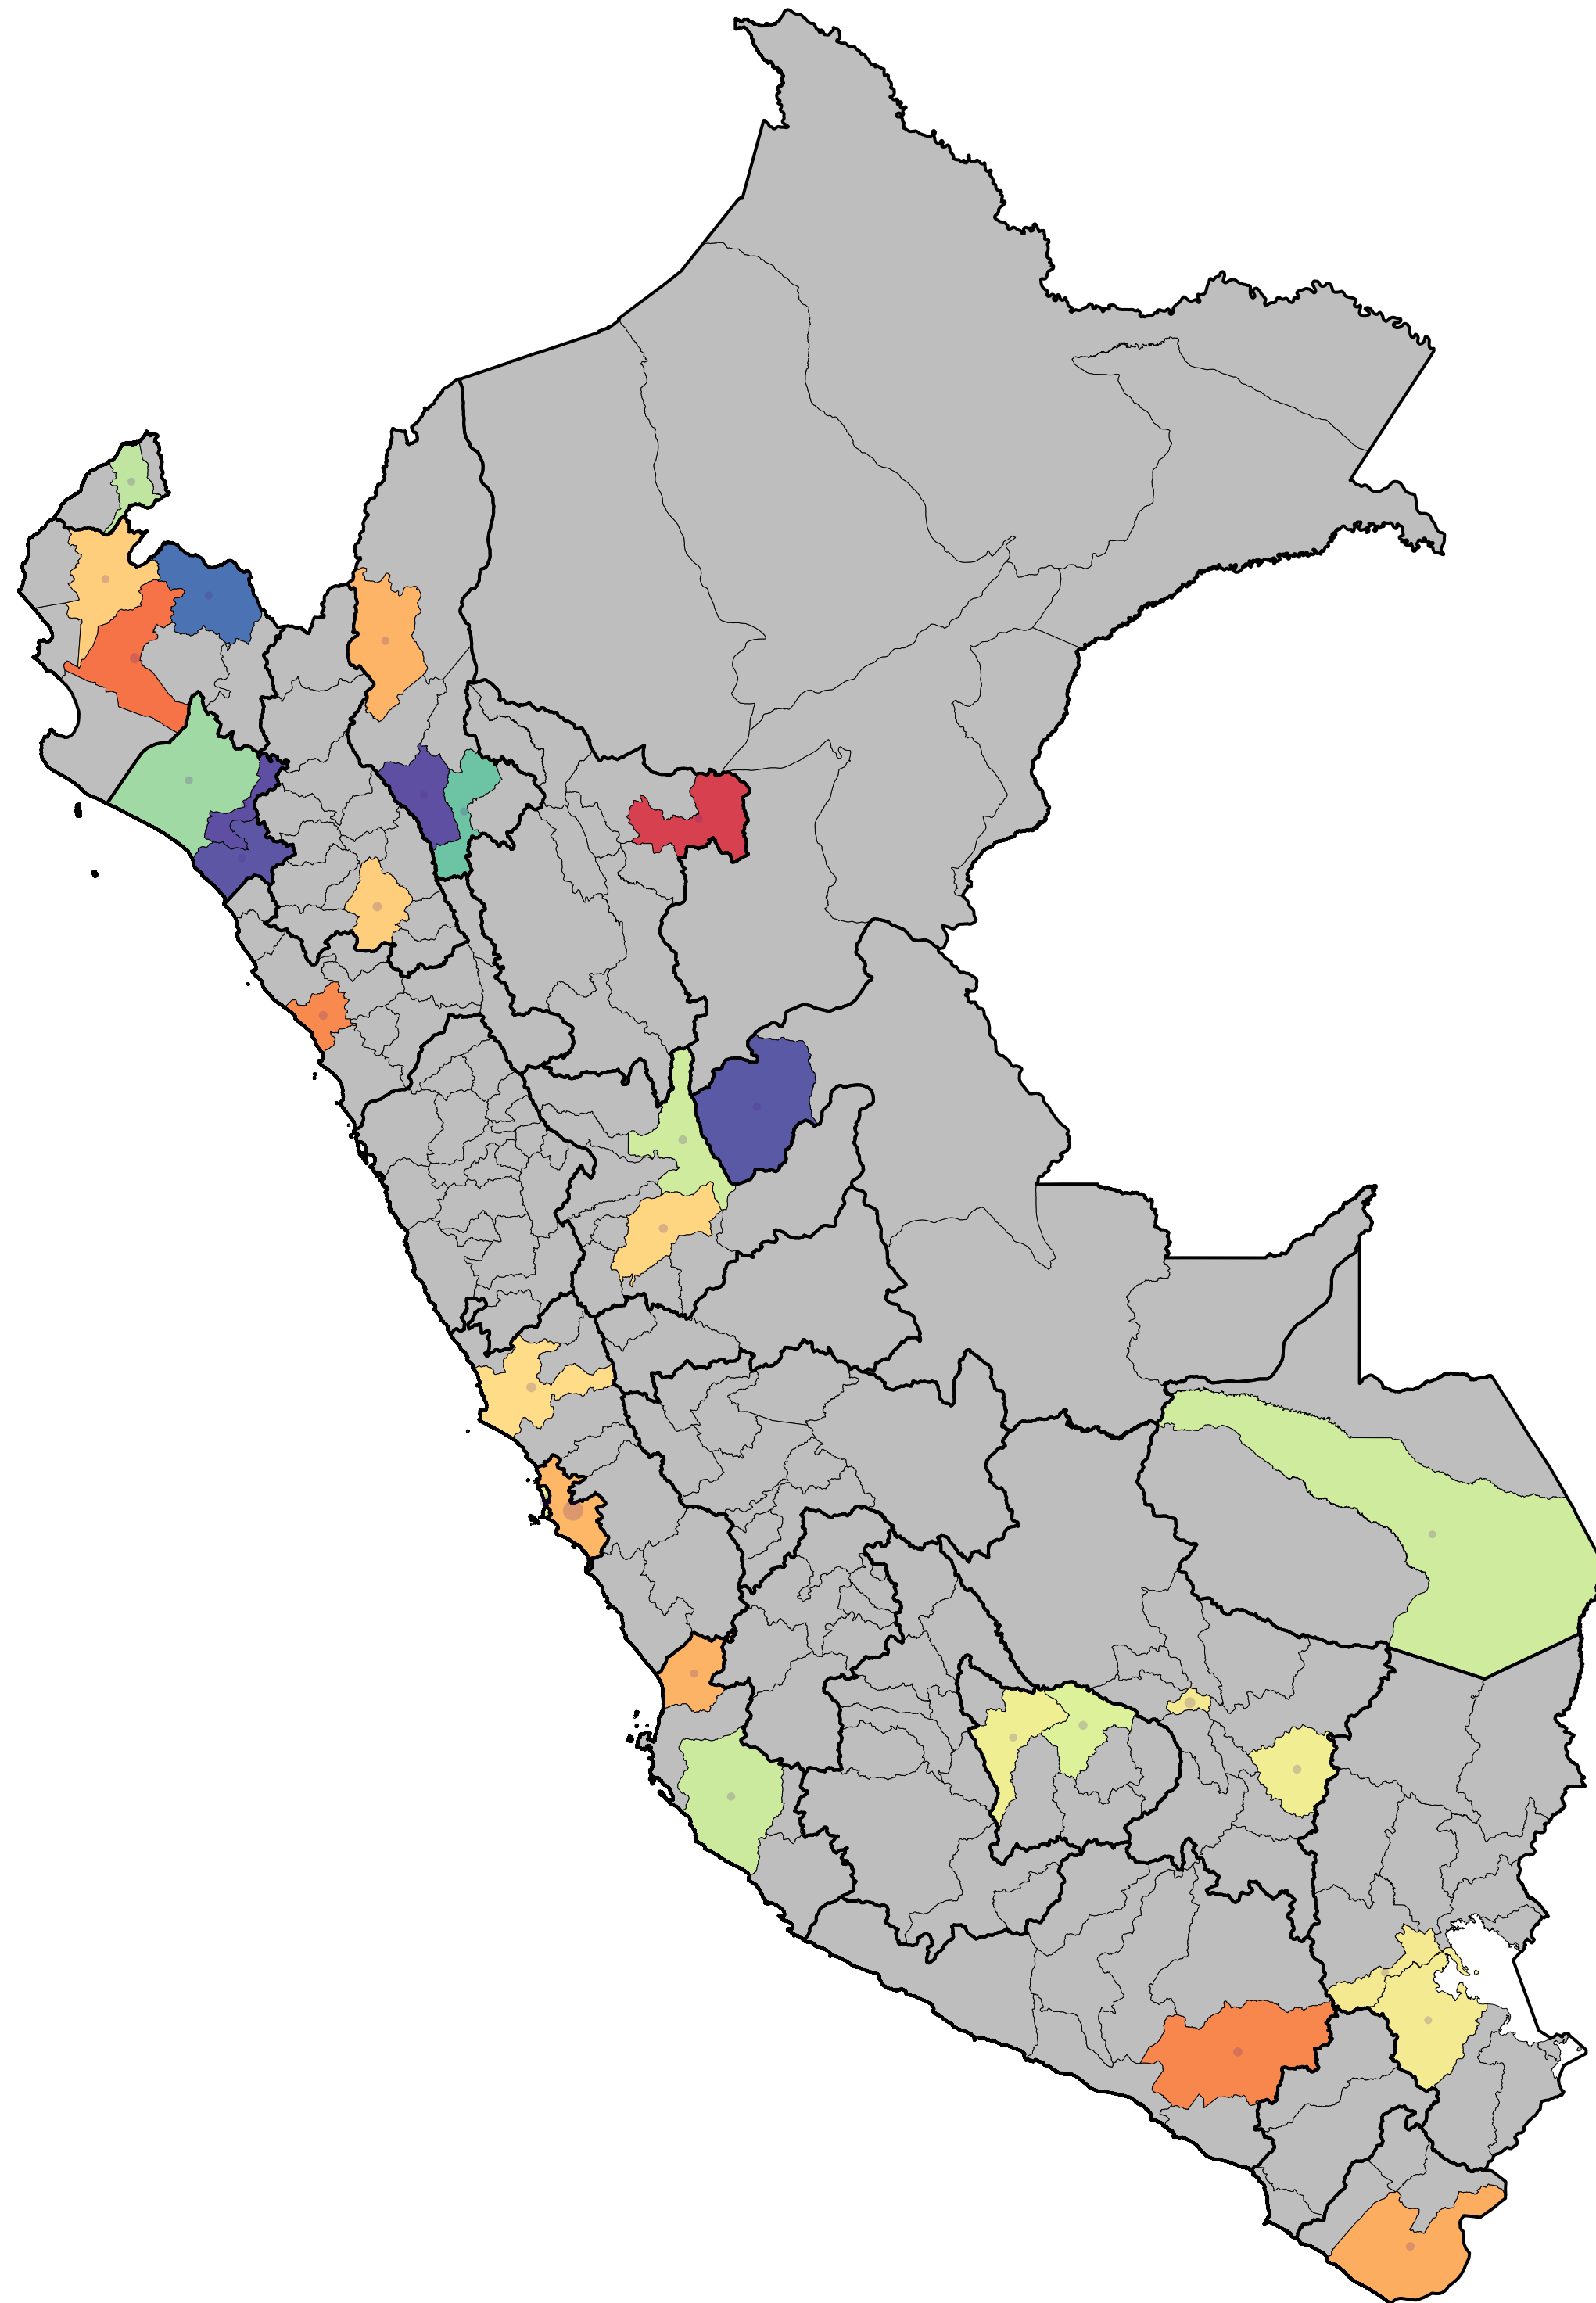

Prevalence of cesarean delivery (%), 2012

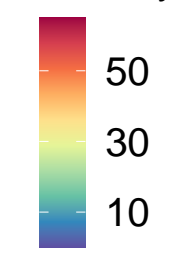

Number of births

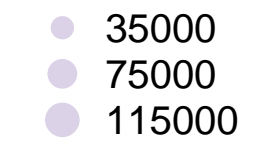

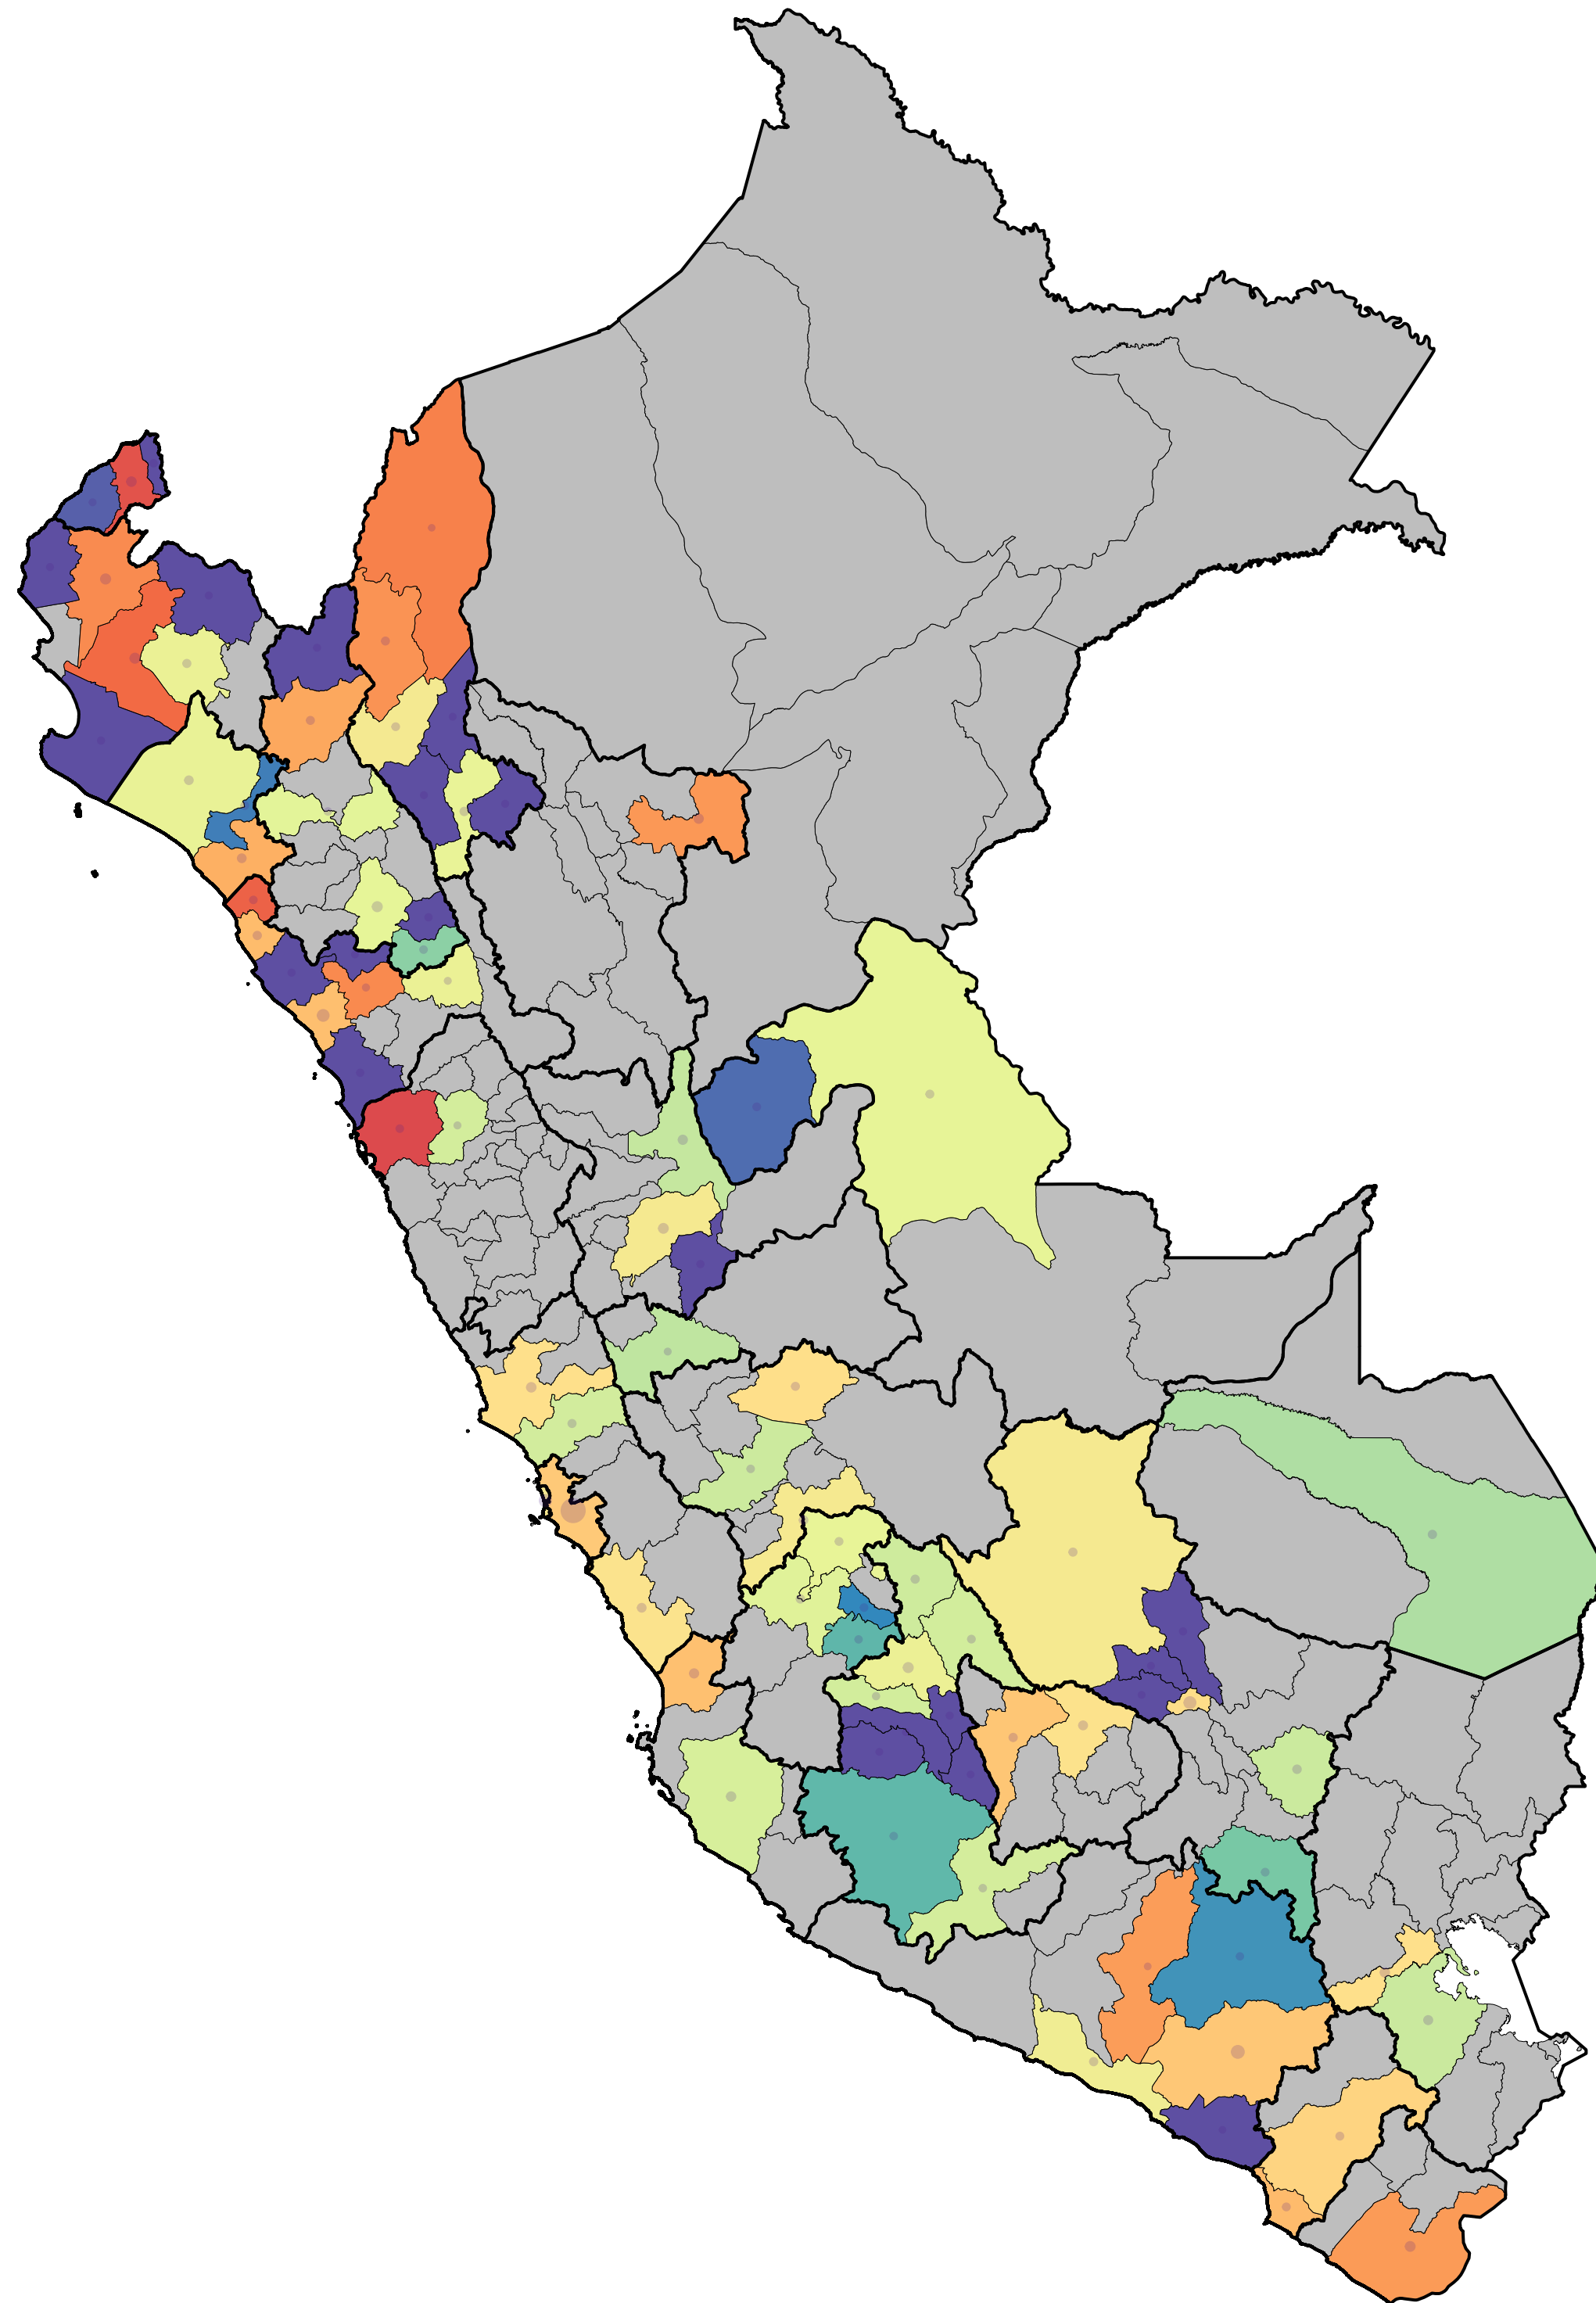

Prevalence of cesarean delivery (%), 2013

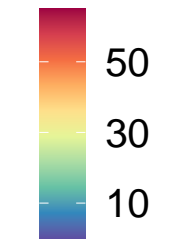

Number of births



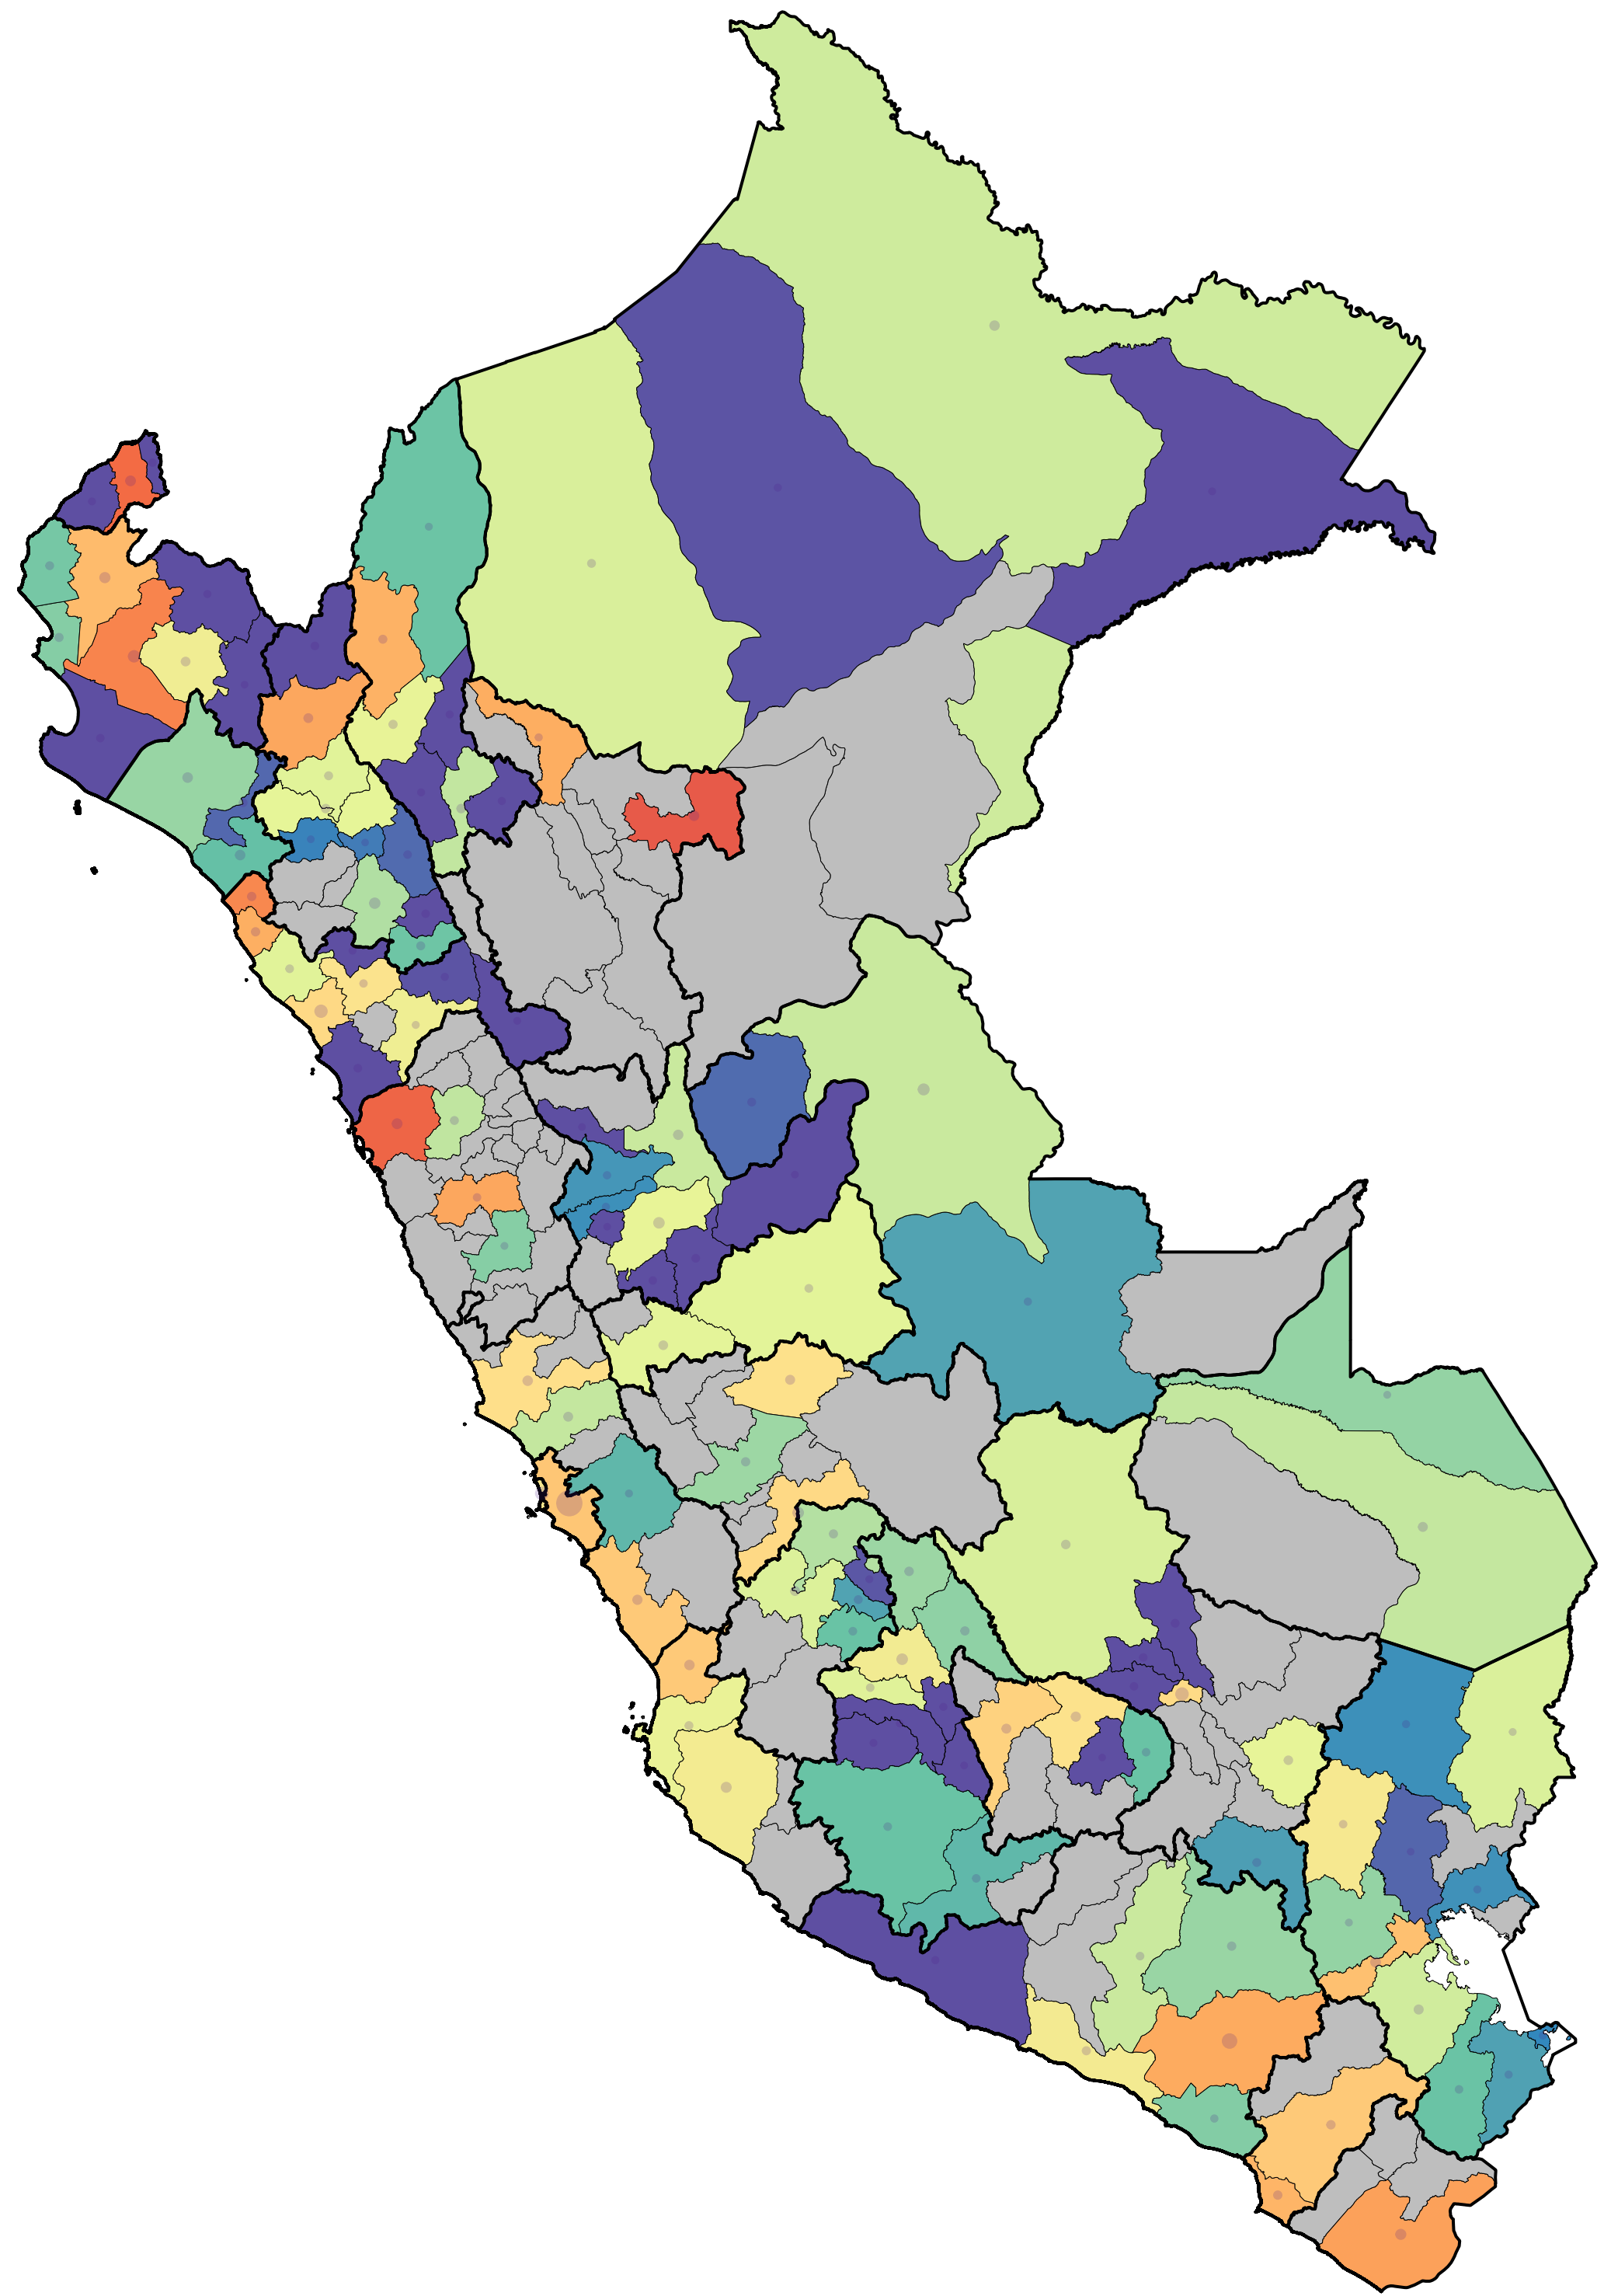

Prevalence of cesarean delivery (%), 2014



Number of births



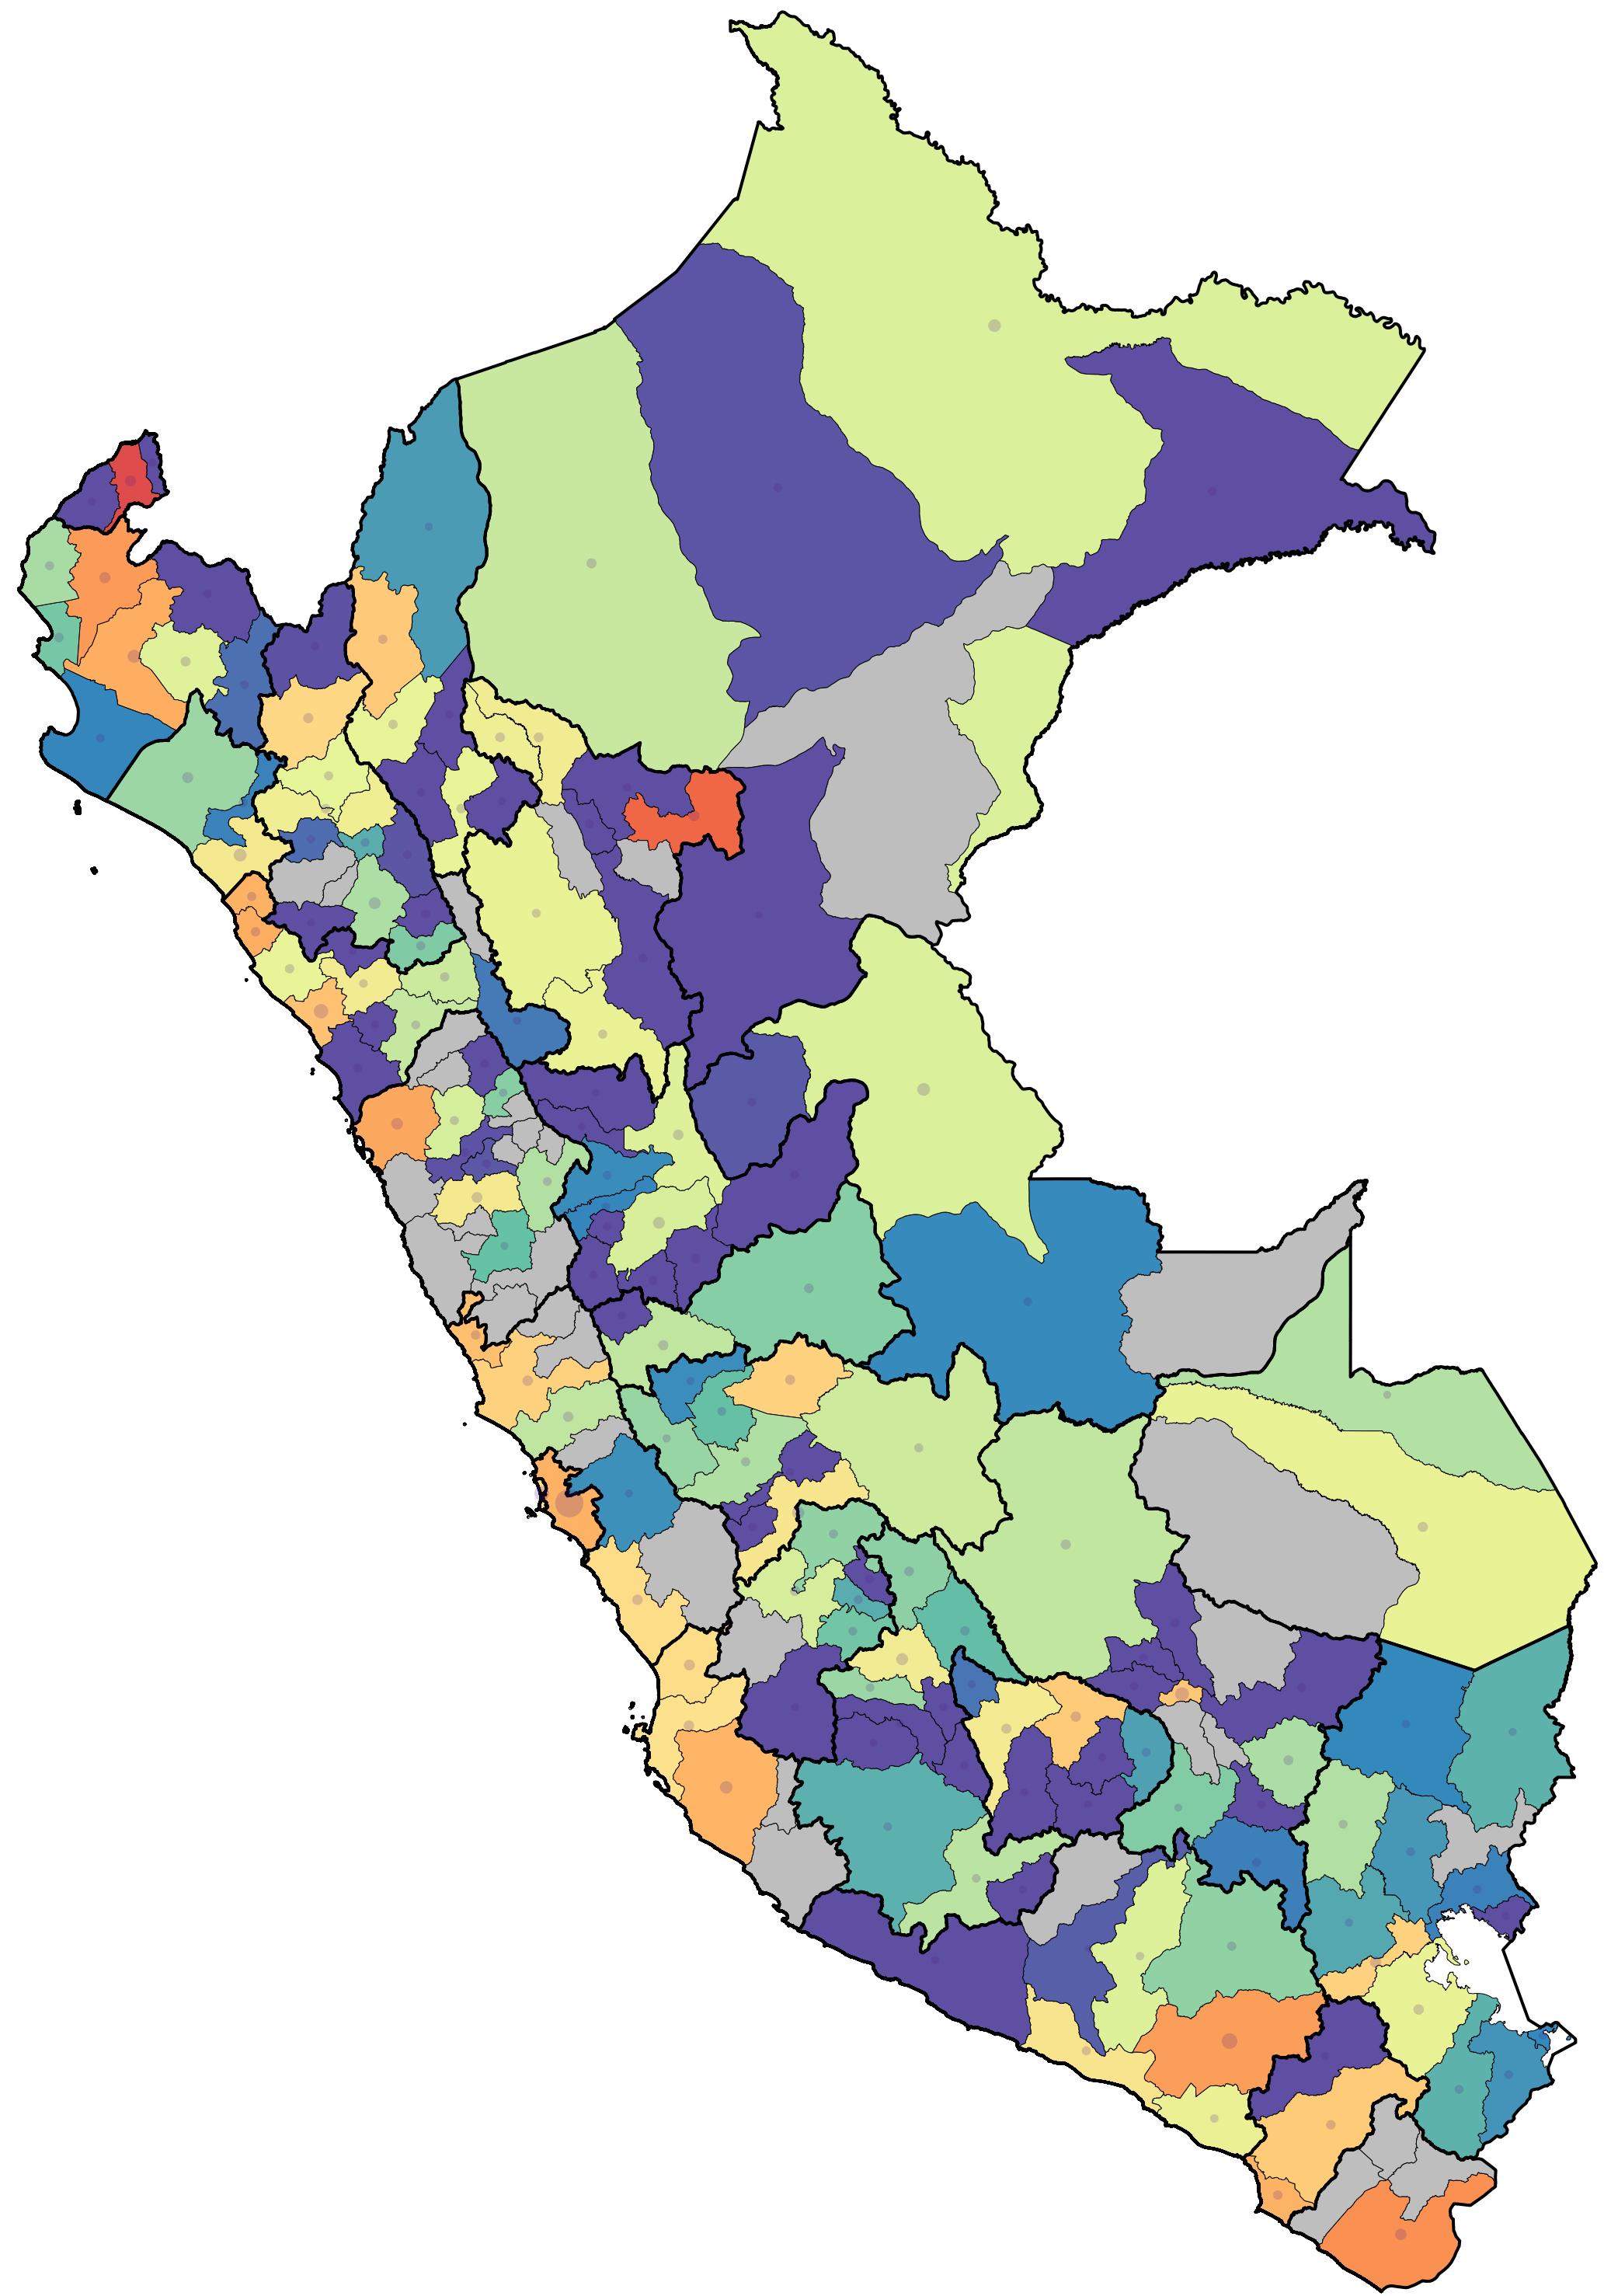

Prevalence of cesarean delivery (%), 2015



Number of births





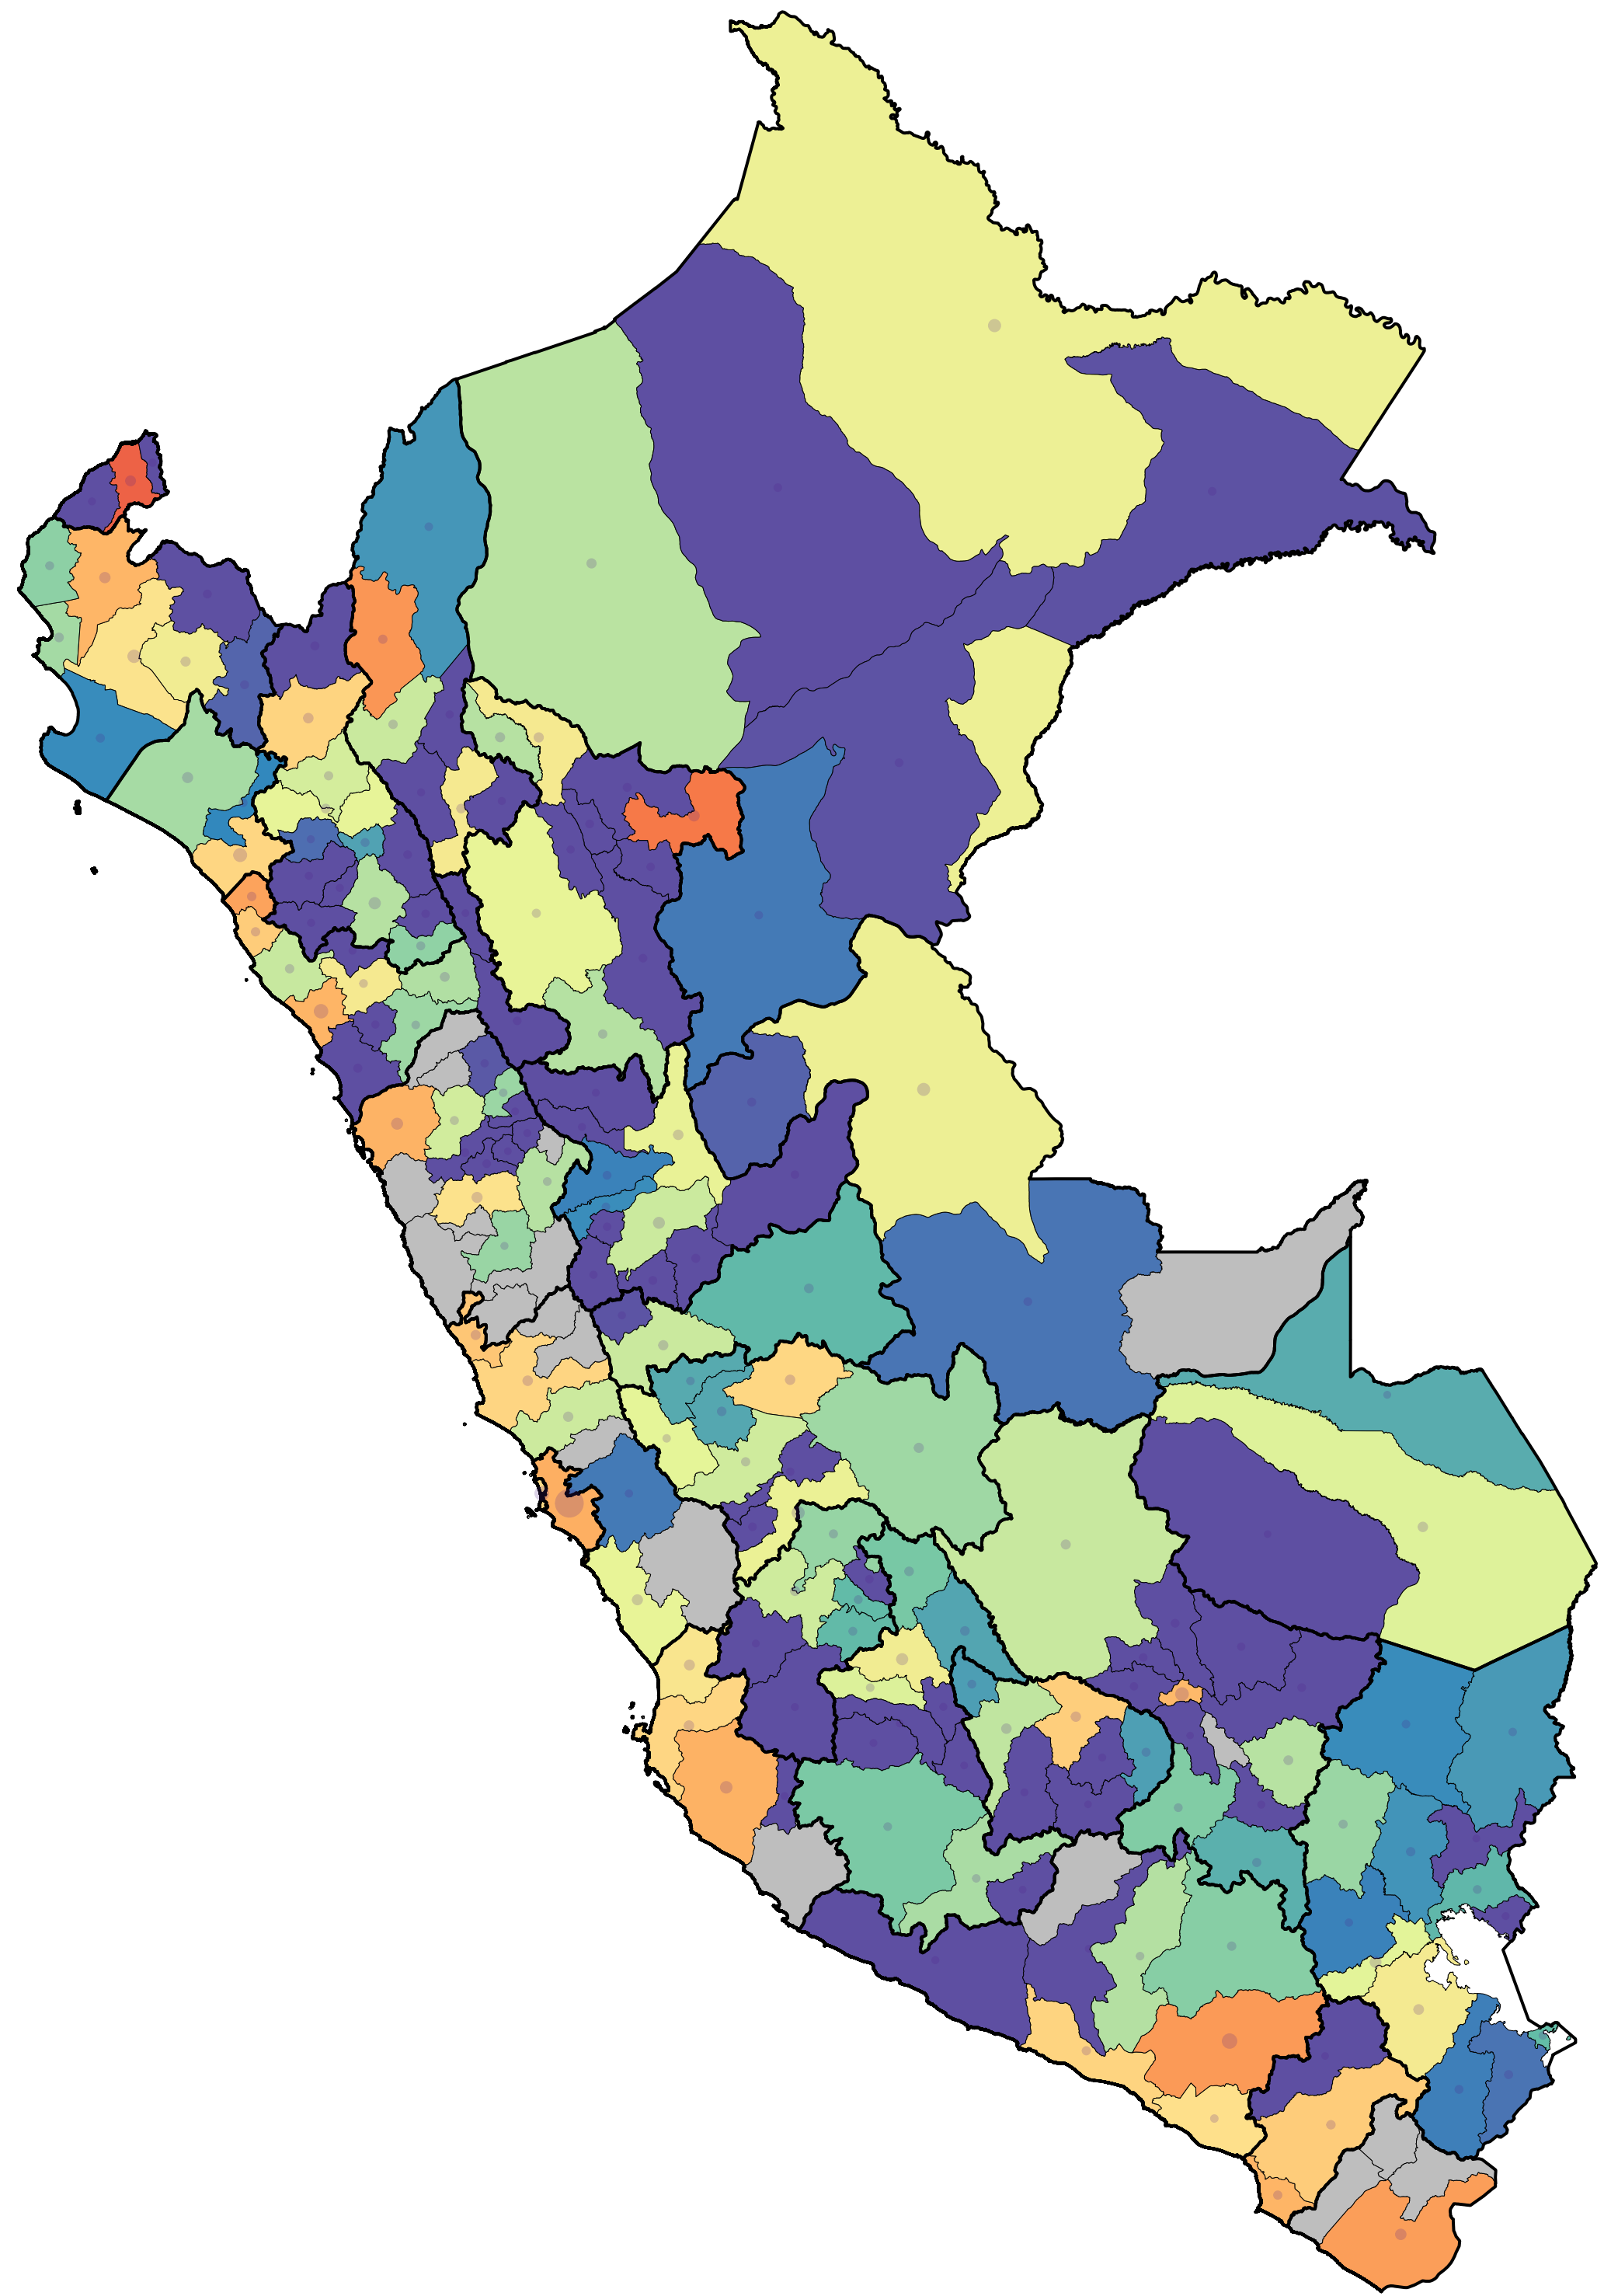

Prevalence of cesarean delivery (%), 2016



Number of births



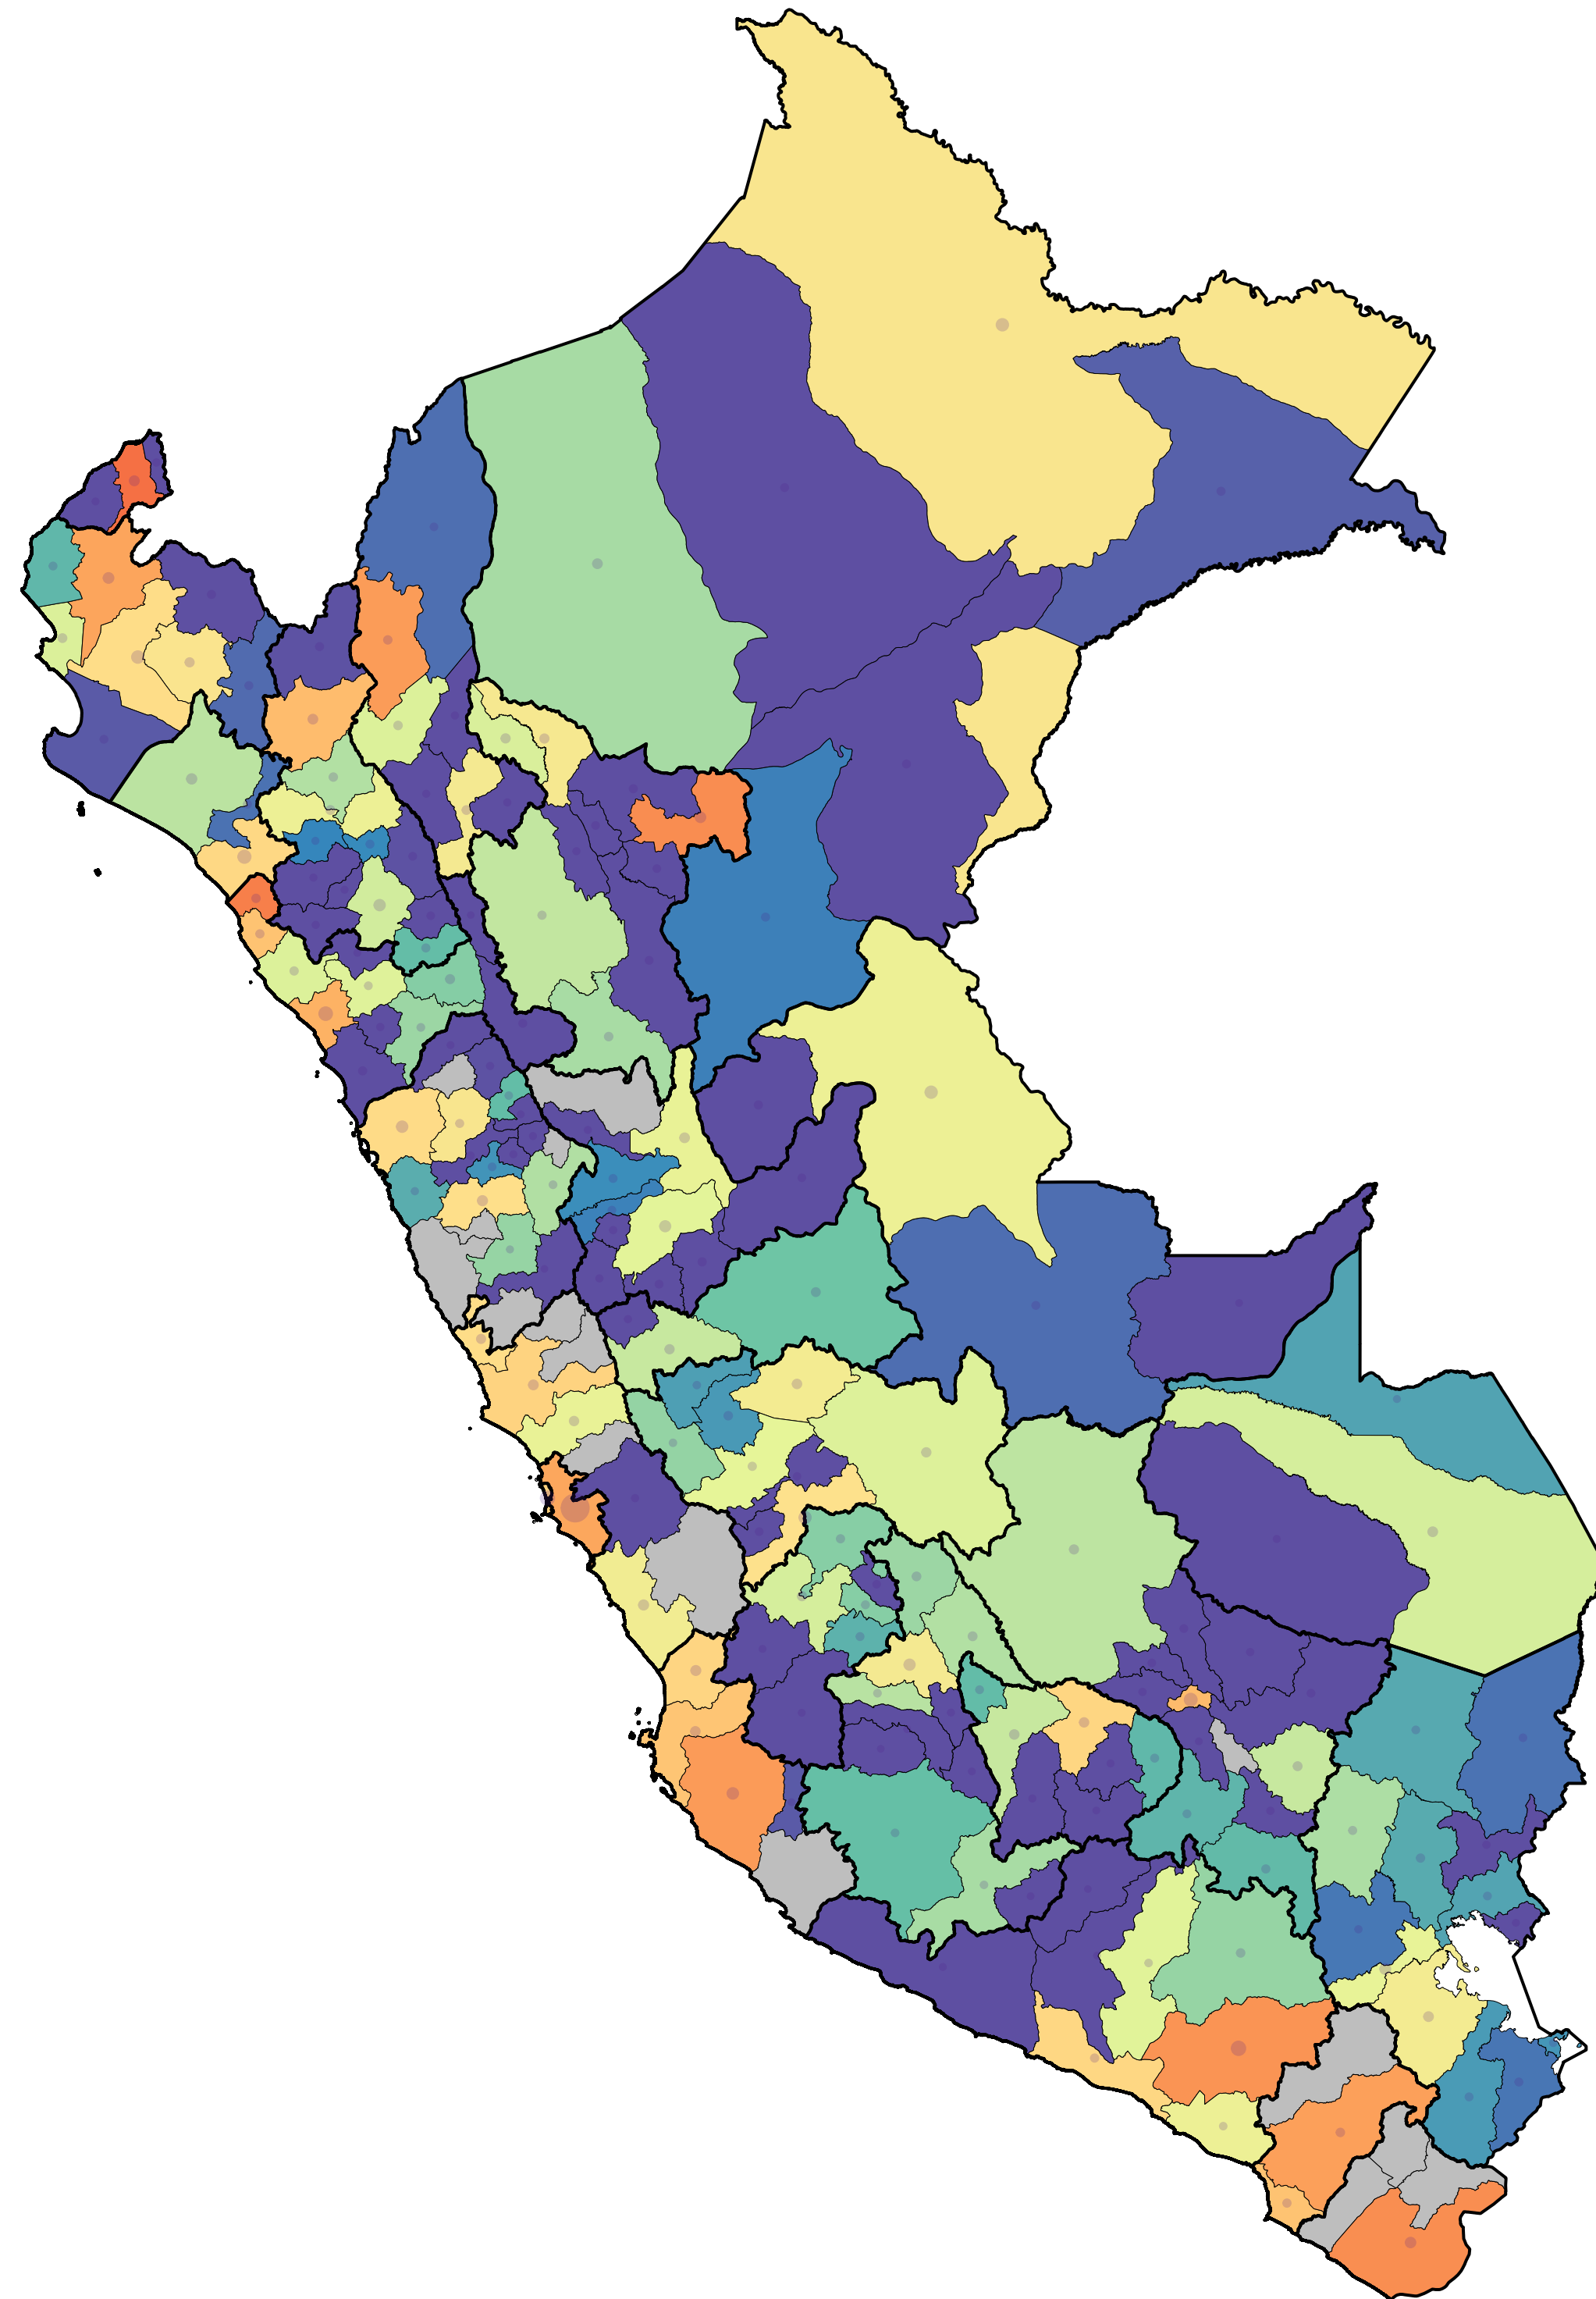

Prevalence of cesarean delivery (%), 2017



Number of births





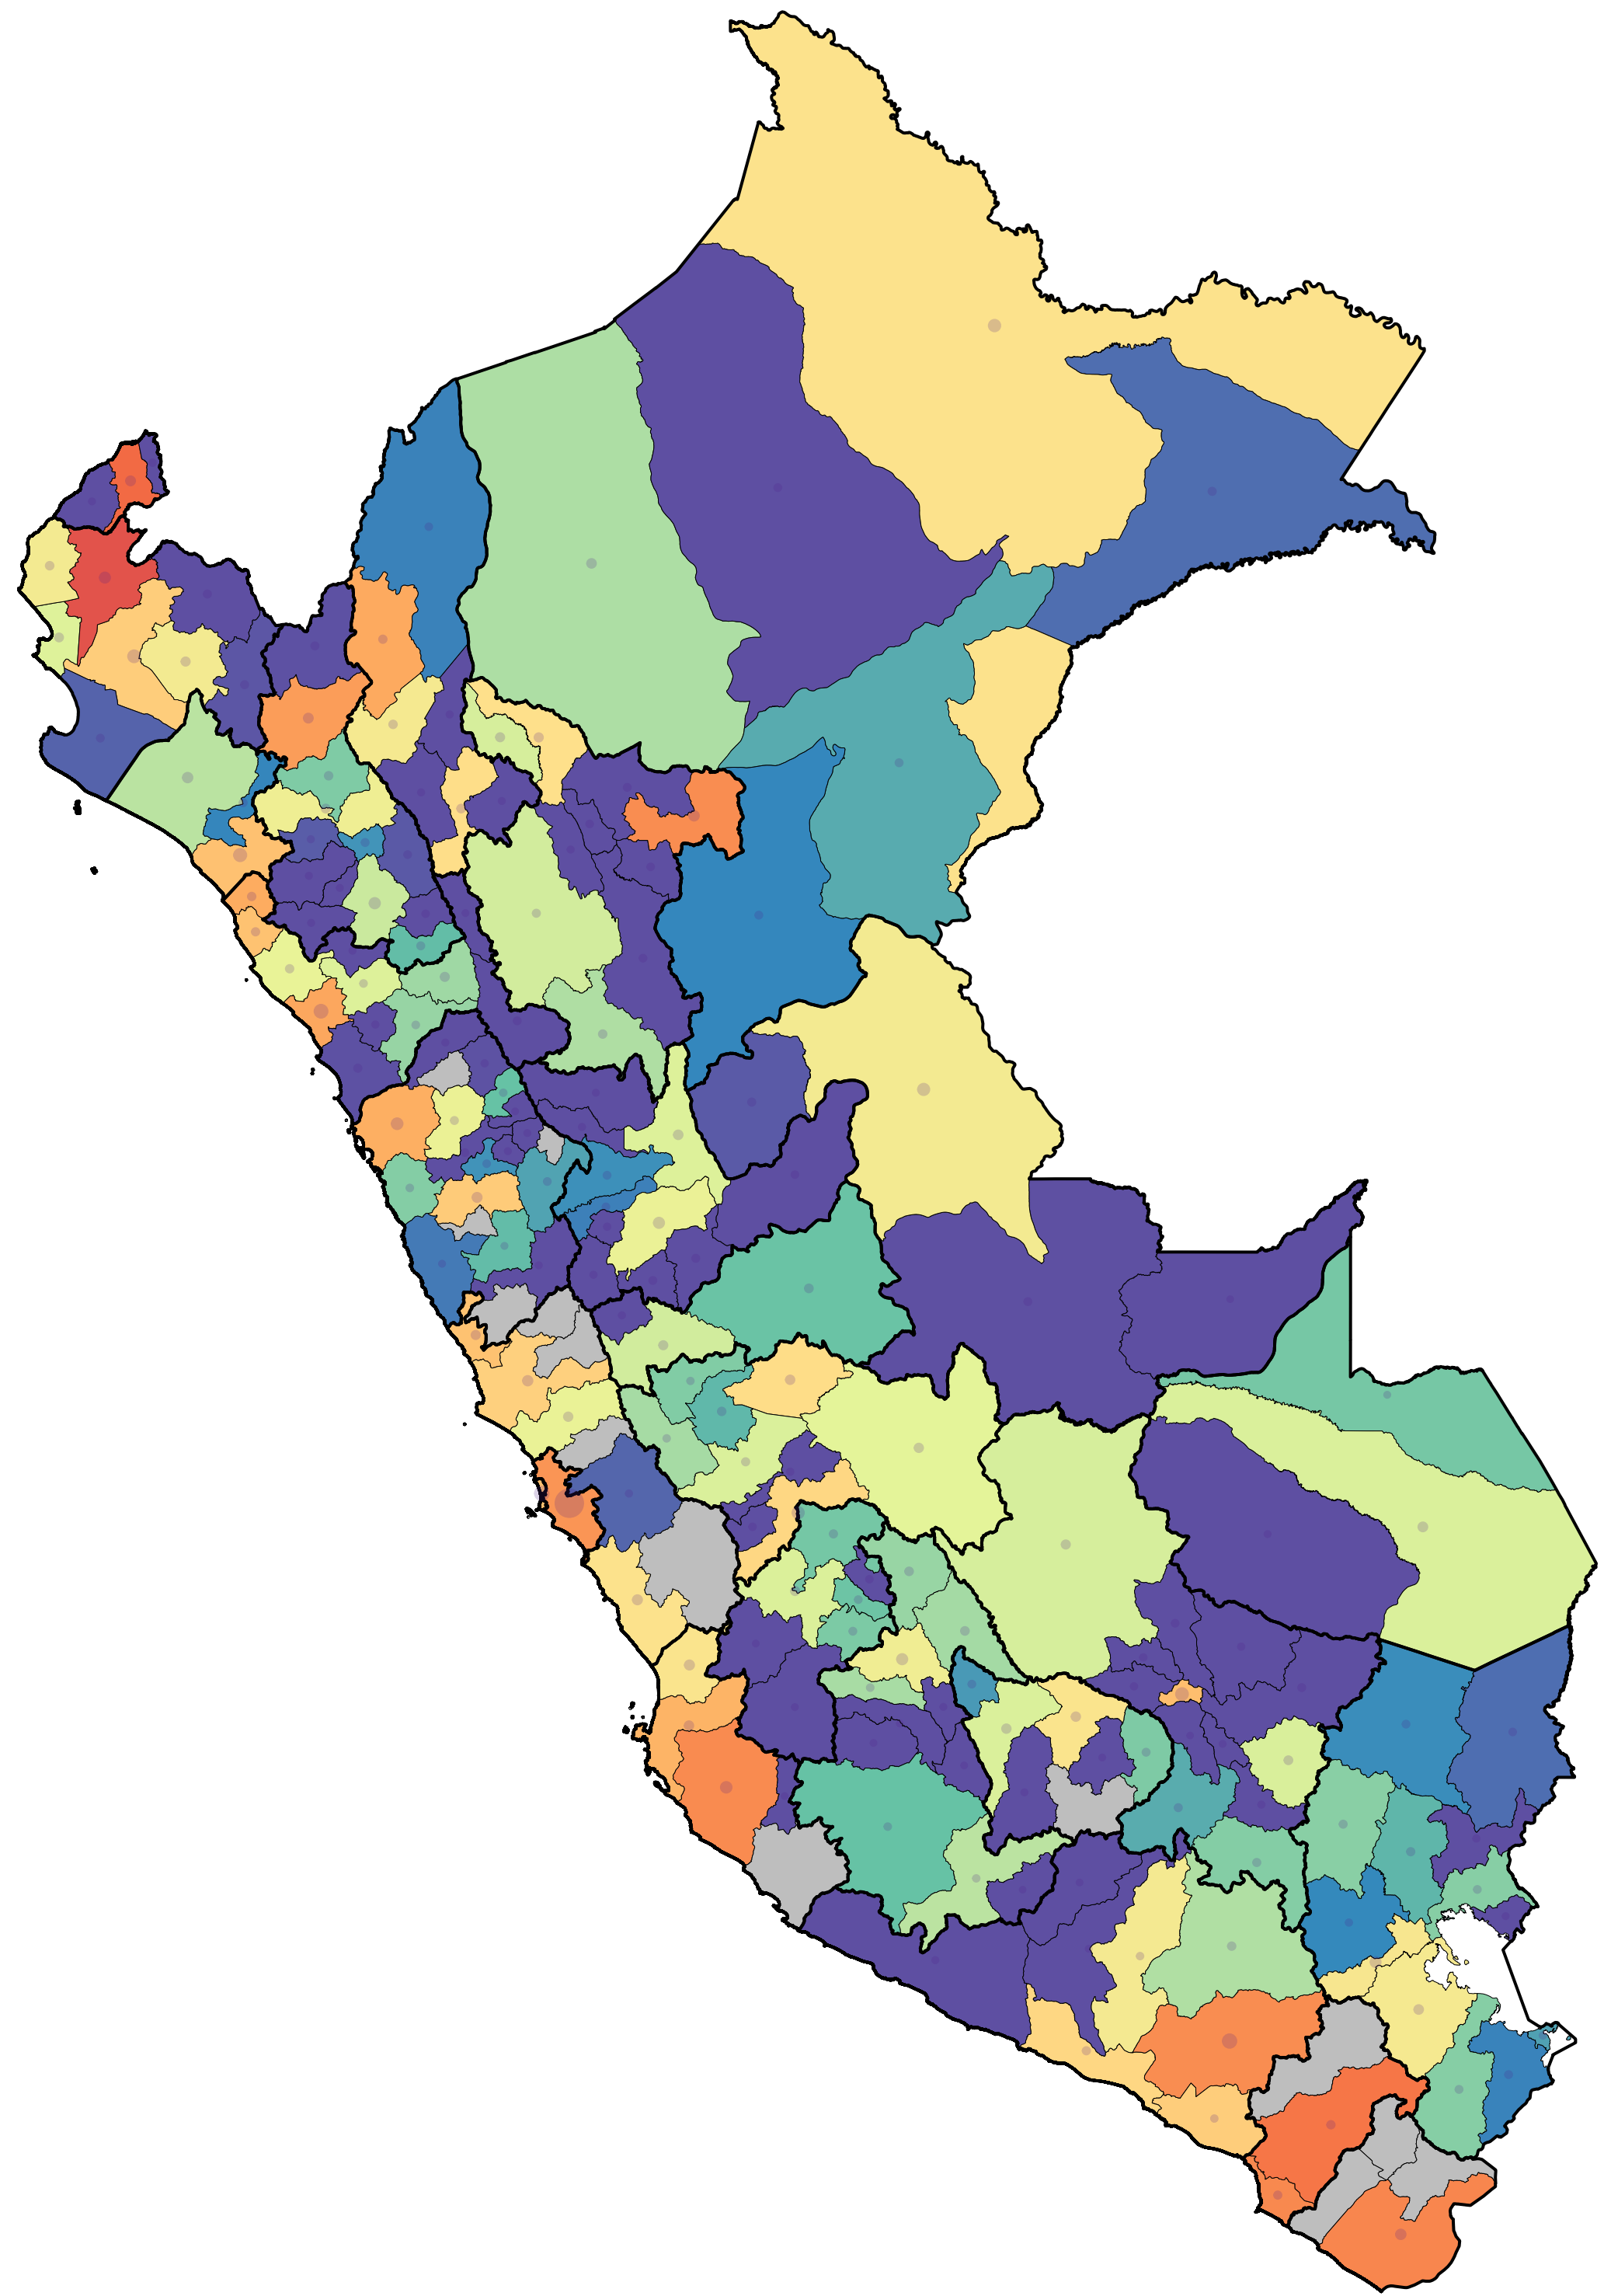

Prevalence of cesarean delivery (%), 2018



Number of births



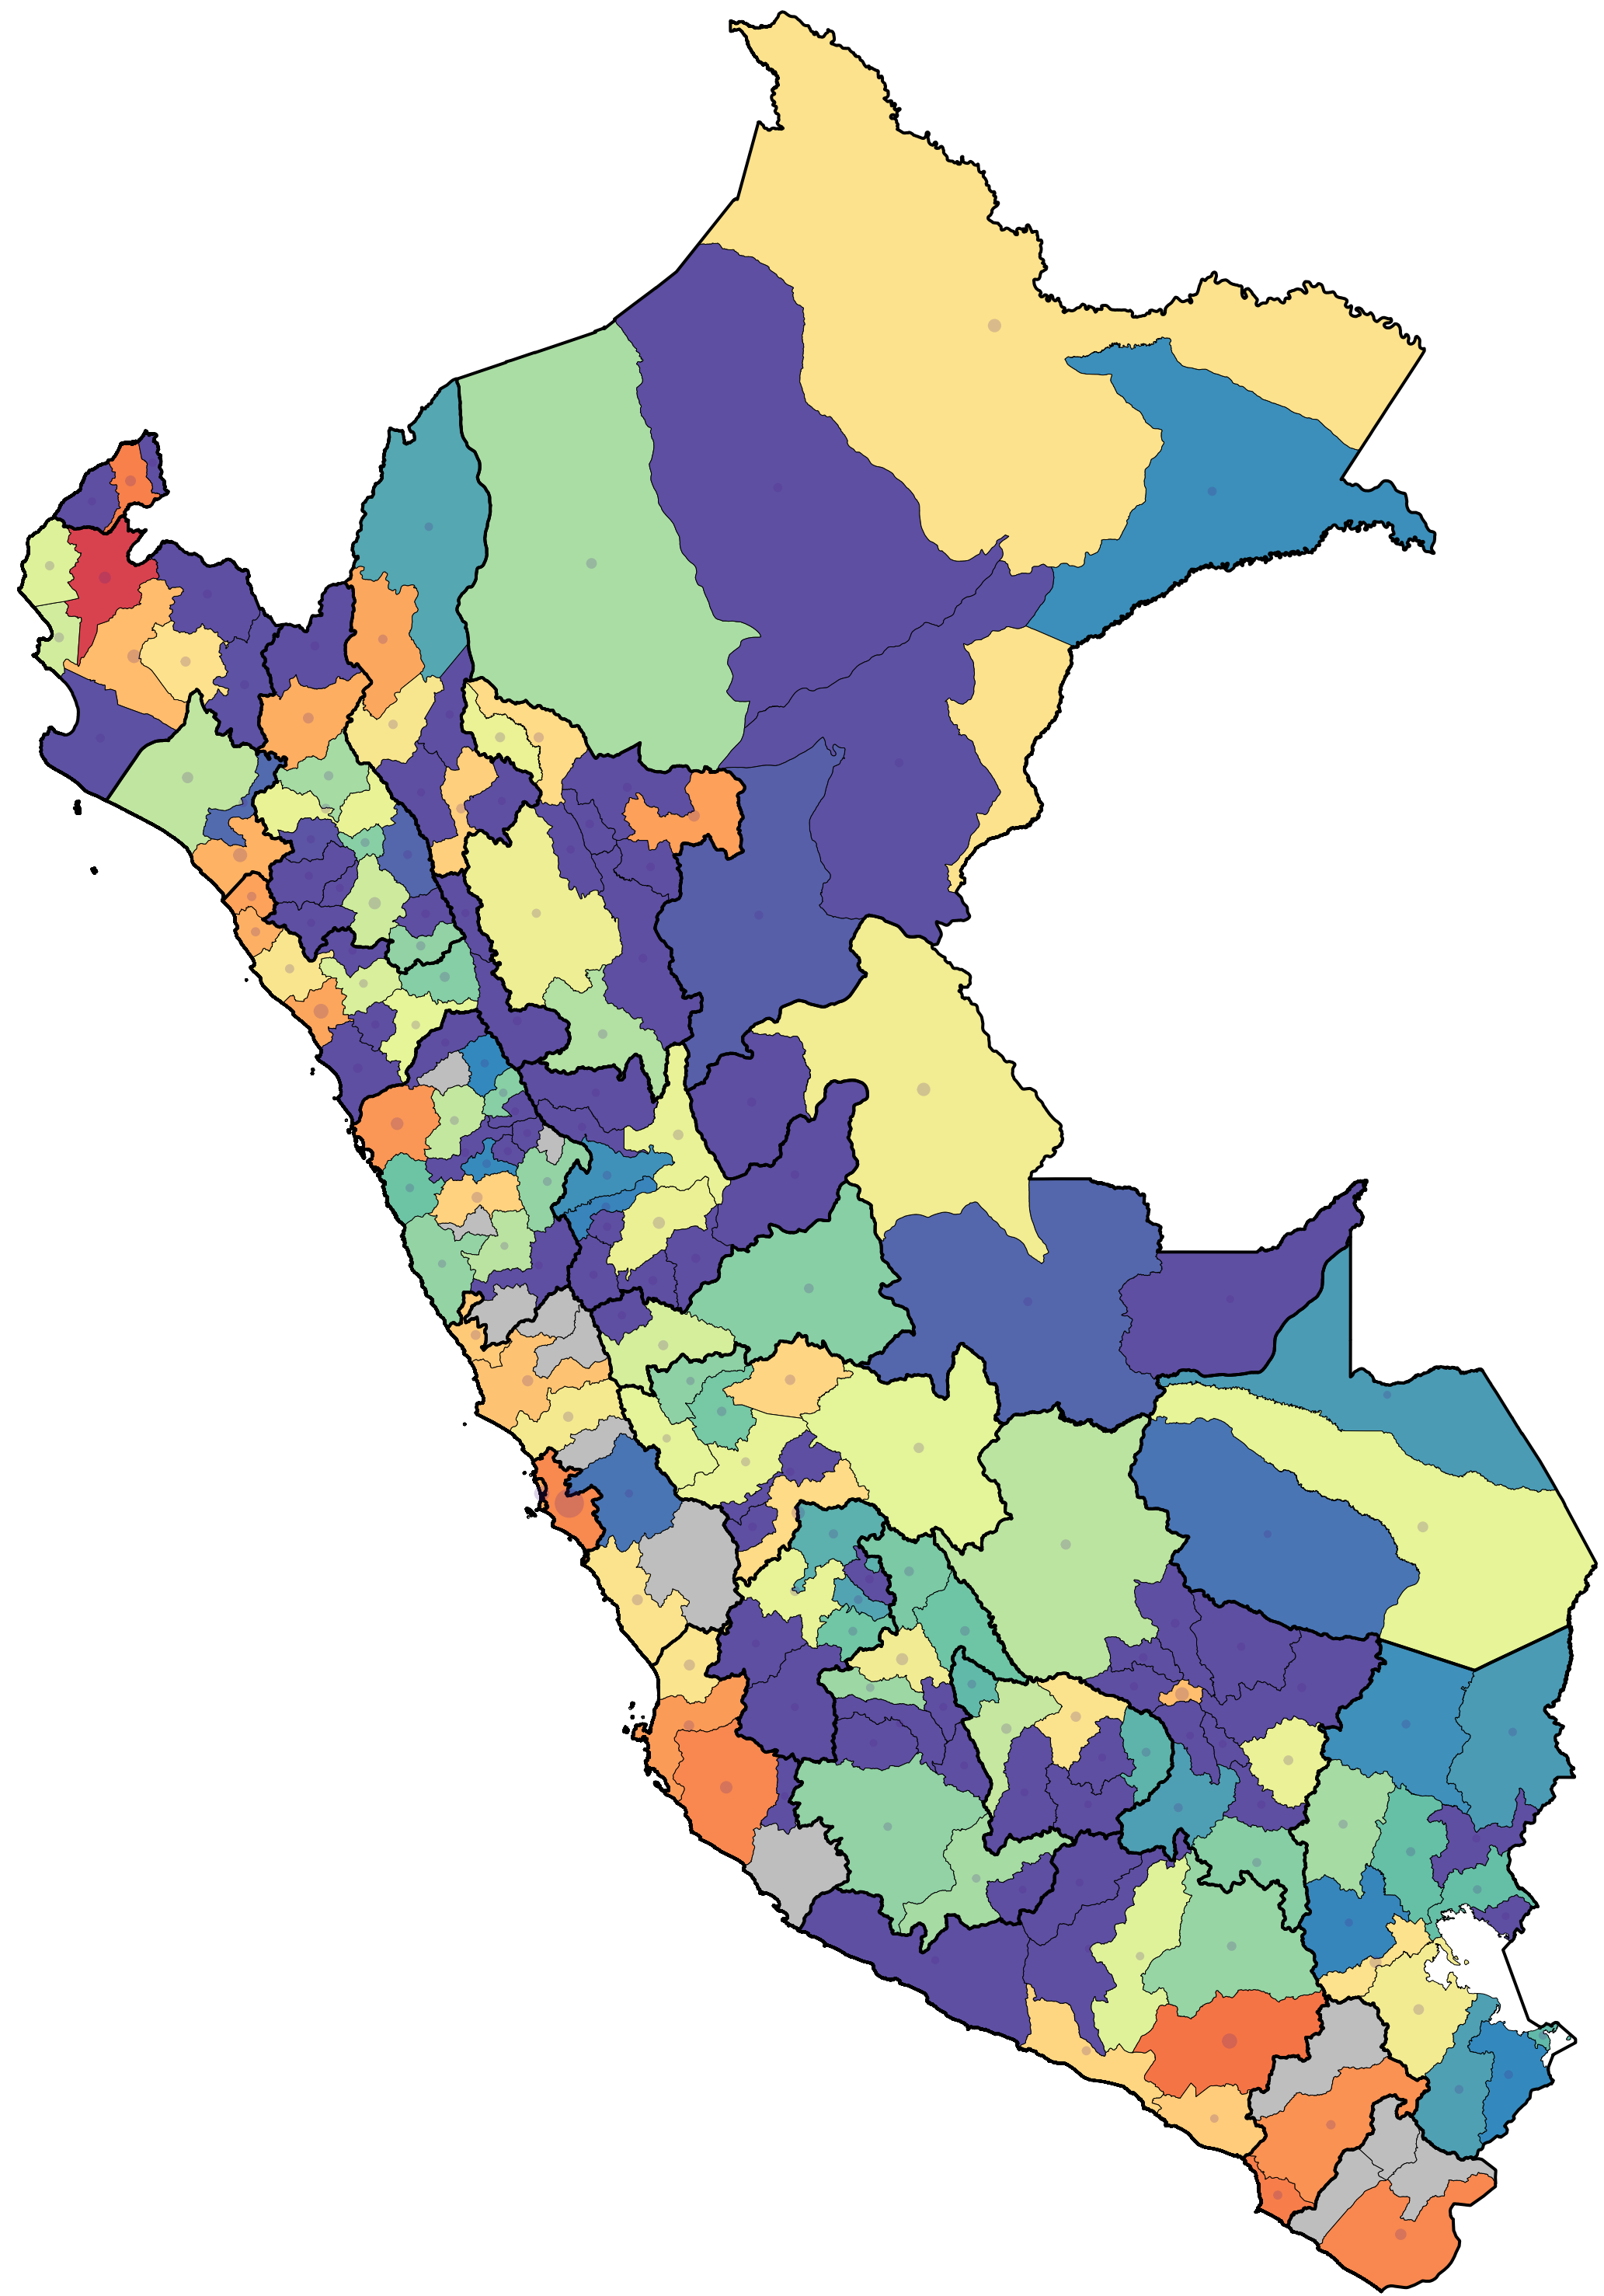

Prevalence of cesarean delivery (%), 2019



Number of births



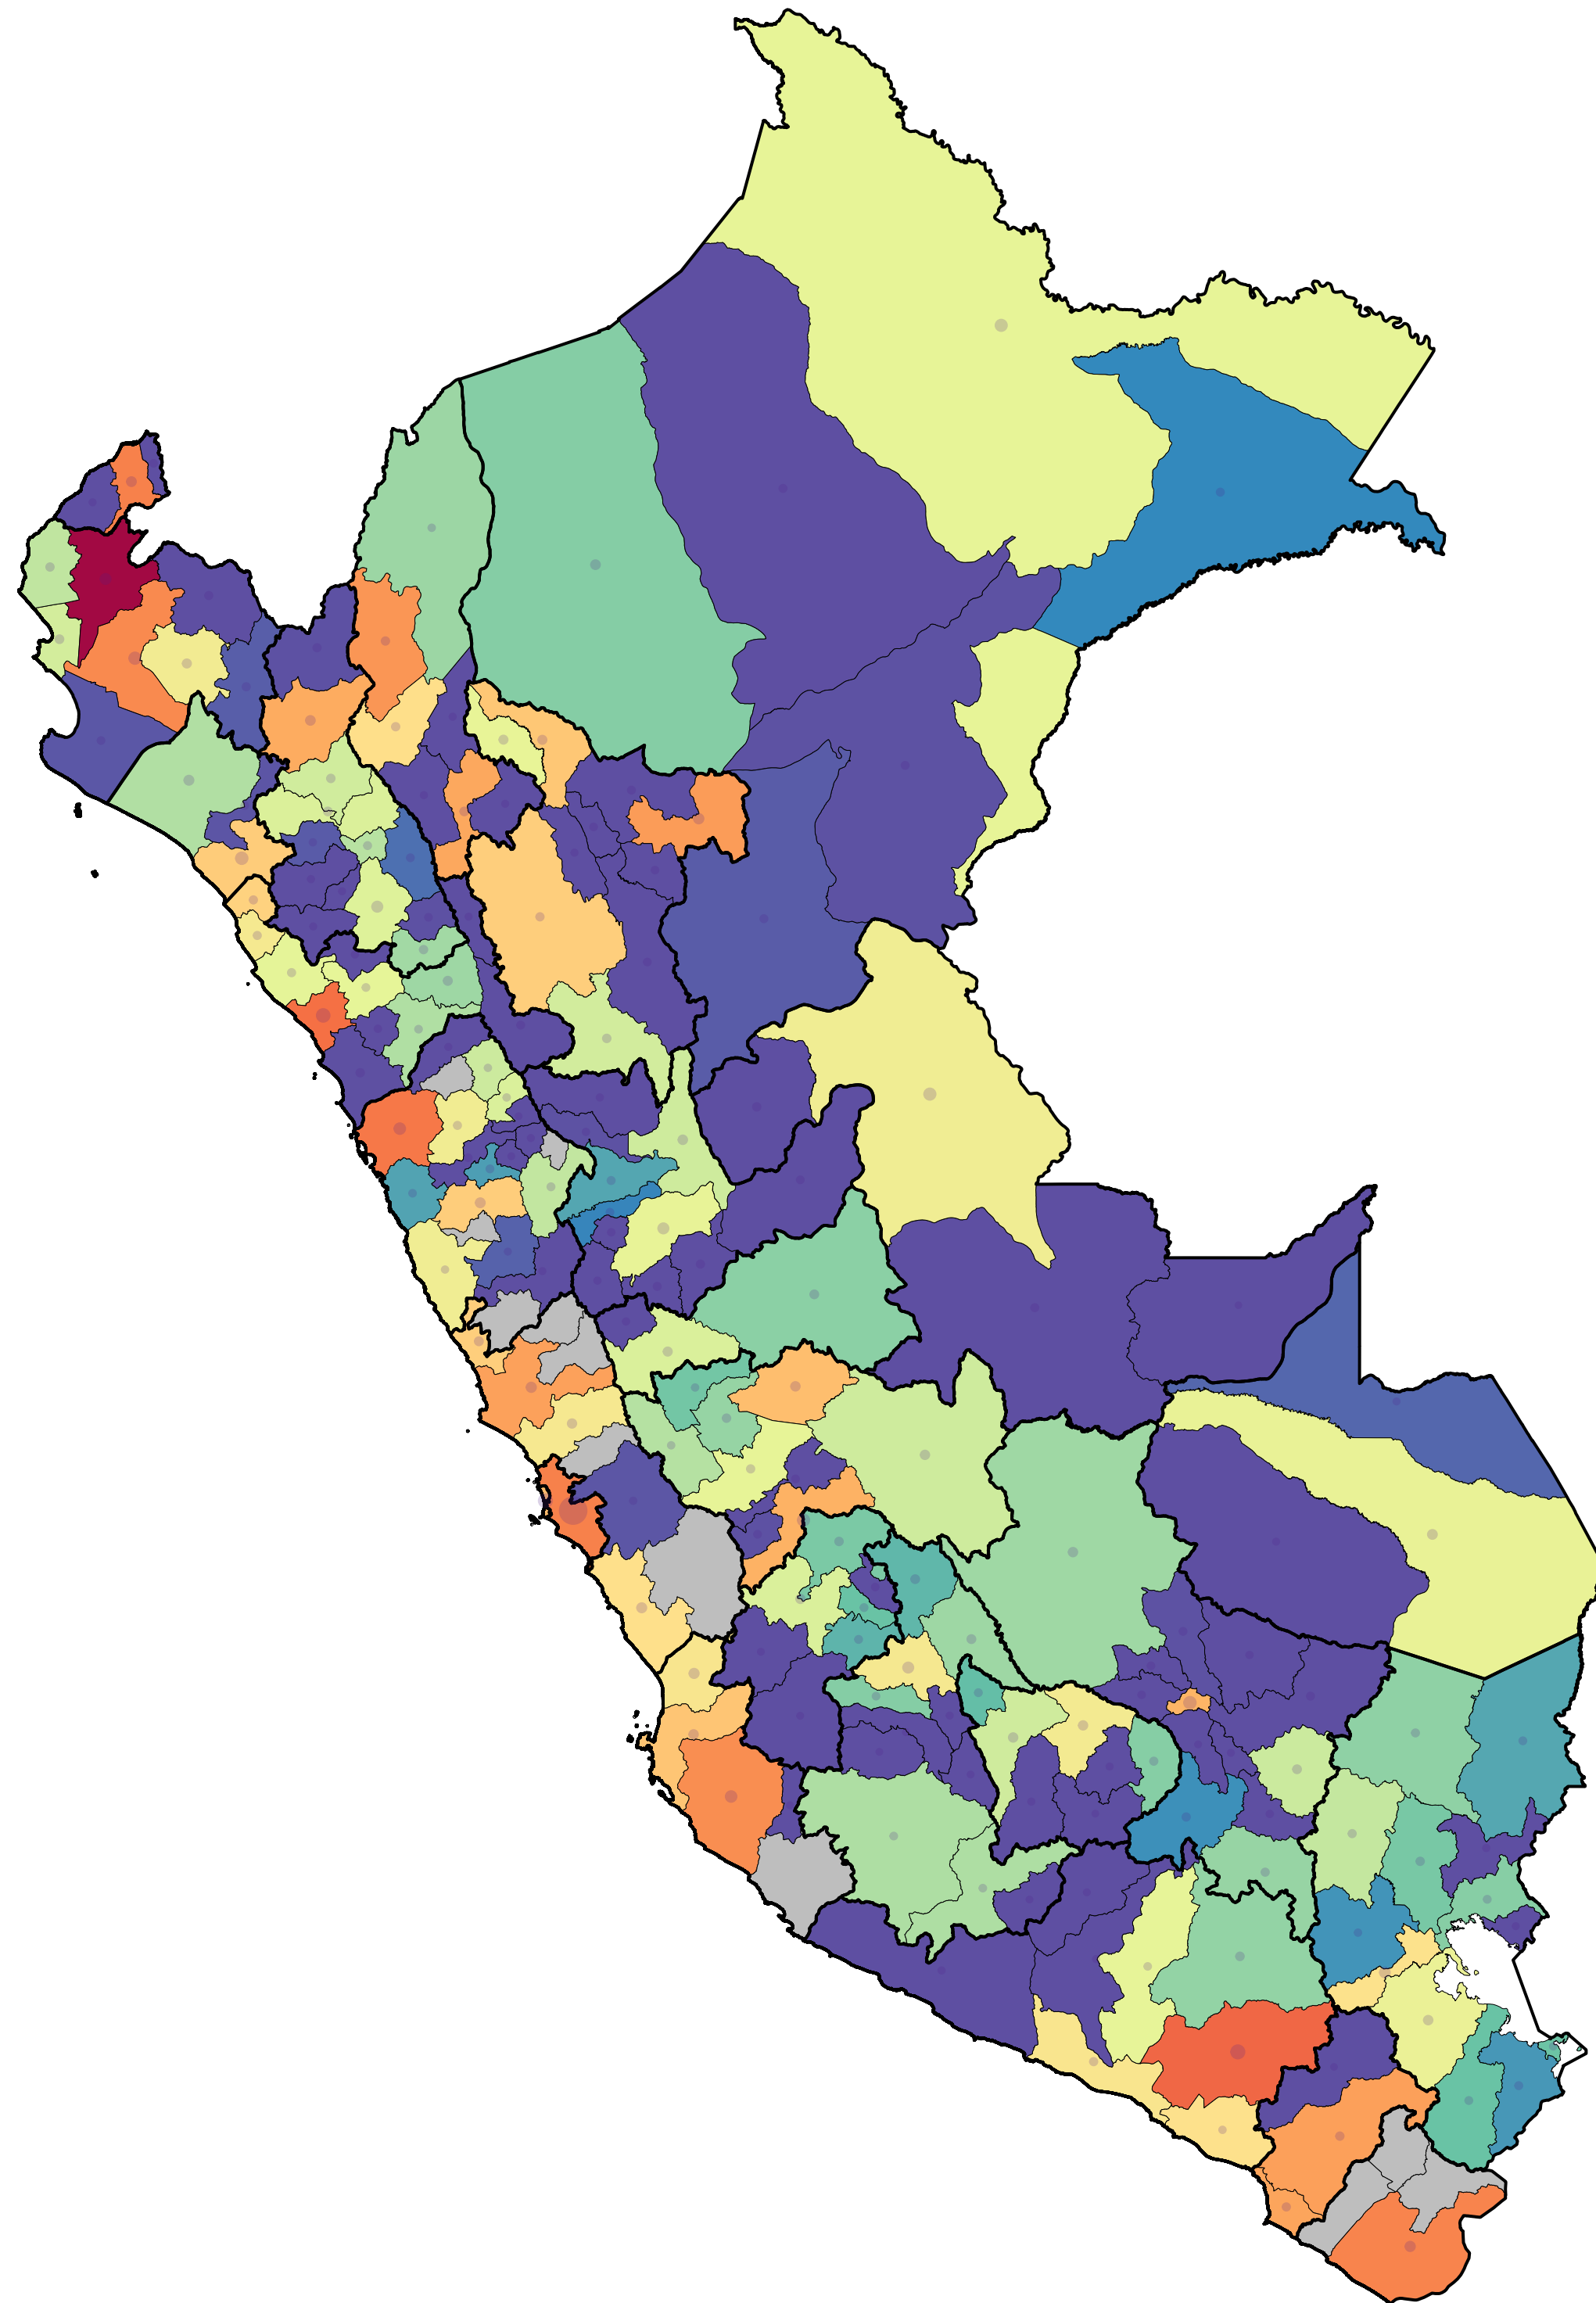

Prevalence of cesarean delivery (%), 2020



Number of births



STROBE Statement—Checklist of items that should be included in reports of *cohort studies*

|                              | Item No | Recommendation                                                                                                                                                                                                                                                                                                         | Page No |
|------------------------------|---------|------------------------------------------------------------------------------------------------------------------------------------------------------------------------------------------------------------------------------------------------------------------------------------------------------------------------|---------|
| <b>Title and abstract</b>    | 1       | (a) Indicate the study’s design with a commonly used term in the title or the abstract<br>(b) Provide in the abstract an informative and balanced summary of what was done and what was found                                                                                                                          | 1, 4    |
| <b>Introduction</b>          |         |                                                                                                                                                                                                                                                                                                                        |         |
| Background/rationale         | 2       | Explain the scientific background and rationale for the investigation being reported                                                                                                                                                                                                                                   | 7       |
| Objectives                   | 3       | State specific objectives, including any prespecified hypotheses                                                                                                                                                                                                                                                       | 7       |
| <b>Methods</b>               |         |                                                                                                                                                                                                                                                                                                                        |         |
| Study design                 | 4       | Present key elements of study design early in the paper                                                                                                                                                                                                                                                                | 8-9     |
| Setting                      | 5       | Describe the setting, locations, and relevant dates, including periods of recruitment, exposure, follow-up, and data collection                                                                                                                                                                                        | 8       |
| Participants                 | 6       | (a) Give the eligibility criteria, and the sources and methods of selection of participants. Describe methods of follow-up<br>(b) For matched studies, give matching criteria and number of exposed and unexposed                                                                                                      | 9       |
| Variables                    | 7       | Clearly define all outcomes, exposures, predictors, potential confounders, and effect modifiers. Give diagnostic criteria, if applicable                                                                                                                                                                               | 8       |
| Data sources/<br>measurement | 8*      | For each variable of interest, give sources of data and details of methods of assessment (measurement). Describe comparability of assessment methods if there is more than one group                                                                                                                                   | 8       |
| Bias                         | 9       | Describe any efforts to address potential sources of bias                                                                                                                                                                                                                                                              | 13      |
| Study size                   | 10      | Explain how the study size was arrived at                                                                                                                                                                                                                                                                              | 8       |
| Quantitative variables       | 11      | Explain how quantitative variables were handled in the analyses. If applicable, describe which groupings were chosen and why                                                                                                                                                                                           | 9       |
| Statistical methods          | 12      | (a) Describe all statistical methods, including those used to control for confounding<br>(b) Describe any methods used to examine subgroups and interactions<br>(c) Explain how missing data were addressed<br>(d) If applicable, explain how loss to follow-up was addressed<br>(e) Describe any sensitivity analyses | 9-10    |
| <b>Results</b>               |         |                                                                                                                                                                                                                                                                                                                        |         |
| Participants                 | 13*     | (a) Report numbers of individuals at each stage of study—eg numbers potentially eligible, examined for eligibility, confirmed eligible, included in the study, completing follow-up, and analysed<br>(b) Give reasons for non-participation at each stage<br>(c) Consider use of a flow diagram                        | 11      |
| Descriptive data             | 14*     | (a) Give characteristics of study participants (eg demographic, clinical, social) and information on exposures and potential confounders<br>(b) Indicate number of participants with missing data for each variable of interest<br>(c) Summarise follow-up time (eg, average and total amount)                         | 11, 12  |
| Outcome data                 | 15*     | Report numbers of outcome events or summary measures over time                                                                                                                                                                                                                                                         | 11,12   |

|                          |    |                                                                                                                                                                                                                                                                                                                                                                                                               |       |
|--------------------------|----|---------------------------------------------------------------------------------------------------------------------------------------------------------------------------------------------------------------------------------------------------------------------------------------------------------------------------------------------------------------------------------------------------------------|-------|
| Main results             | 16 | (a) Give unadjusted estimates and, if applicable, confounder-adjusted estimates and their precision (eg, 95% confidence interval). Make clear which confounders were adjusted for and why they were included<br>(b) Report category boundaries when continuous variables were categorized<br>(c) If relevant, consider translating estimates of relative risk into absolute risk for a meaningful time period | 11,12 |
| Other analyses           | 17 | Report other analyses done—eg analyses of subgroups and interactions, and sensitivity analyses                                                                                                                                                                                                                                                                                                                | 12    |
| <b>Discussion</b>        |    |                                                                                                                                                                                                                                                                                                                                                                                                               |       |
| Key results              | 18 | Summarise key results with reference to study objectives                                                                                                                                                                                                                                                                                                                                                      | 13    |
| Limitations              | 19 | Discuss limitations of the study, taking into account sources of potential bias or imprecision. Discuss both direction and magnitude of any potential bias                                                                                                                                                                                                                                                    | 13,14 |
| Interpretation           | 20 | Give a cautious overall interpretation of results considering objectives, limitations, multiplicity of analyses, results from similar studies, and other relevant evidence                                                                                                                                                                                                                                    | 13,14 |
| Generalisability         | 21 | Discuss the generalisability (external validity) of the study results                                                                                                                                                                                                                                                                                                                                         | 14,15 |
| <b>Other information</b> |    |                                                                                                                                                                                                                                                                                                                                                                                                               |       |
| Funding                  | 22 | Give the source of funding and the role of the funders for the present study and, if applicable, for the original study on which the present article is based                                                                                                                                                                                                                                                 | 3     |

\*Give information separately for exposed and unexposed groups.

**Note:** An Explanation and Elaboration article discusses each checklist item and gives methodological background and published examples of transparent reporting. The STROBE checklist is best used in conjunction with this article (freely available on the Web sites of PLoS Medicine at <http://www.plosmedicine.org/>, Annals of Internal Medicine at <http://www.annals.org/>, and Epidemiology at <http://www.epidem.com/>). Information on the STROBE Initiative is available at <http://www.strobe-statement.org>.
